# Supplementary material for: Catalytic enantioselective and regioselective substitution of 2,3-indolyldimethanols with enaminones
Source: Royal Society of Chemistry journal article supplement (doi:10.1039/c8qo00565f), 2018-01-01
Supplement: c8qo00565f1.pdf [file c8qo00565f1.pdf]

## *Supporting Information for*

### **Catalytic Enantioselective and Regioselective Substitution of 2,3-Indolyldimethanols with Enaminones**

Yi-Nan Lu,<sup>a</sup> Chun Ma,<sup>a</sup> Jin-Ping Lan,<sup>a</sup> Caiqiang Zhu,<sup>b</sup> Yu-Jia Mao,<sup>a</sup> Guang-Jian Mei,<sup>a</sup> Shu

Zhang,<sup>\*b</sup> and Feng Shi<sup>\*a</sup>

<sup>a</sup>*School of Chemistry and Materials Science, Jiangsu Normal University, Xuzhou, 221116, China*

<sup>b</sup>*Department of Radiotherapy, The First Affiliated Hospital of Nanjing Medical University,*

*Nanjing, 210029, China*

E-mail: [fshi@jsnu.edu.cn](mailto:fshi@jsnu.edu.cn); [zhangshu@njmu.edu.cn](mailto:zhangshu@njmu.edu.cn)

#### **Contents:**

- 1. General procedure for the synthesis of substrates 1 and their characteristic data (S2-S5)**
- 2. NMR spectra of products 3 (S6-S26)**
- 3. HPLC spectra of product 3 (S27-S47)**
- 4. X-ray single-crystal data of product 3dg (S48-S49)**
- 5. Biological evaluation of compounds 3aa-3ae and 3ag (S50)**

## 1. General procedure for the synthesis of substrates 1 and their characteristic data

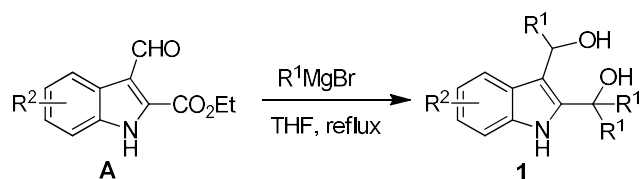

Under argon atmosphere at 0 °C, the solution of starting materials **A** (5 mmol) in THF (40 mL) was added to the Grignard reagents (30 mmol). Then, the reaction mixture was warmed up to 70 °C and stirred overnight. After completing the reaction, saturated NH<sub>4</sub>Cl aqueous solution was added to the reaction mixture, which was extracted by EtOAc. The resultant organic layer was dried by anhydrous Na<sub>2</sub>SO<sub>4</sub> and purified by flash column chromatography (petroleum ether/ethyl acetate = 6/1) to afford substrates **1**.

### (3-(hydroxy(phenyl)methyl)-1H-indol-2-yl)diphenylmethanol (**1a**):

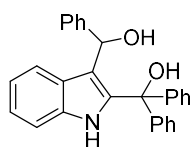

yield: 55% (1.11 g), yellow solid, m.p. 71-72 °C; <sup>1</sup>H NMR (400 MHz, CDCl<sub>3</sub>) δ (ppm): 7.59 (s, 1H), 7.42 – 7.36 (m, 8H), 7.35 – 7.32 (m, 4H), 7.29 (s, 2H), 7.25 – 7.19 (m, 2H), 7.13 – 7.08 (m, 2H), 6.99 (d, *J* = 7.8 Hz, 1H), 6.96 – 6.91 (m, 1H), 6.14 (s, 1H); <sup>13</sup>C NMR (100 MHz, CDCl<sub>3</sub>) δ (ppm): 146.3, 145.1, 142.7, 140.6, 133.9, 128.4, 128.3, 128.2, 128.0, 127.9, 127.7, 127.5, 127.4, 127.3, 126.8, 122.2, 120.0, 119.9, 113.8, 111.0, 78.8, 70.4; IR (KBr): 3689, 3005, 2359, 1733, 1684, 1507, 1457, 1275, 1260, 764, 750, 668 cm<sup>-1</sup>; HRMS (ESI-TOF) *m/z*: [M - H]<sup>-</sup> Calcd for C<sub>28</sub>H<sub>22</sub>NO<sub>2</sub> 404.1651, Found 404.1659.

### bis(3-fluorophenyl)(3-((3-fluorophenyl)(hydroxy)methyl)-1H-indol-2-yl)methanol (**1b**):

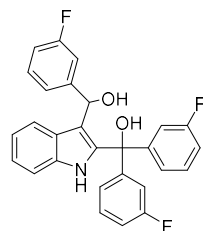

yield: 59% (1.32 g), yellow solid, m.p. 94-95 °C; <sup>1</sup>H NMR (400 MHz, CDCl<sub>3</sub>) δ (ppm): 7.57 (s, 1H), 7.37 – 7.29 (m, 2H), 7.24 (d, *J* = 1.1 Hz, 1H), 7.23 – 7.20 (m, 1H), 7.19 – 7.14 (m, 2H), 7.13 – 7.11 (m, 3H), 7.10 – 7.05 (m, 3H), 7.05 – 6.96 (m, 5H), 6.94 – 6.88 (m, 1H), 6.18 (s, 1H); <sup>13</sup>C NMR (100 MHz, CDCl<sub>3</sub>) δ (ppm): 162.9(d, *J* = 247.3 Hz), 162.8(d, *J* = 245.4 Hz), 162.7(d, *J* = 247.1 Hz), 148.3(d, *J* = 6.4 Hz), 147.1(d, *J* = 6.6 Hz), 145.0(d, *J* = 6.6 Hz), 139.3, 133.8, 130.0(d, *J* = 3.5 Hz), 129.9(d, *J* = 3.8 Hz), 129.8, 127.2, 123.1(d, *J* = 3.0 Hz), 123.0(d, *J* = 2.9 Hz), 122.7, 122.0(d, *J* = 2.9 Hz), 120.5, 119.4, 115.3(d, *J* = 6.2 Hz), 115.1(d, *J* = 6.1 Hz), 114.8(d, *J* = 2.3 Hz), 114.6(d, *J* = 2.2 Hz),

114.3, 113.6(d,  $J = 4.6$  Hz), 113.4, 111.3, 78.0, 69.5; IR (KBr): 3689, 3123, 2342, 1733, 1653, 1507, 1446, 1275, 1260, 764, 750, 668  $\text{cm}^{-1}$ ; HRMS (ESI-TOF)  $m/z$ :  $[M - H]^-$  Calcd for  $\text{C}_{28}\text{H}_{19}\text{F}_3\text{NO}_2$  458.1368, Found 458.1382.

**bis(4-fluorophenyl)(3-((4-fluorophenyl)(hydroxy)methyl)-1*H*-indol-2-yl)methanol (1c):**

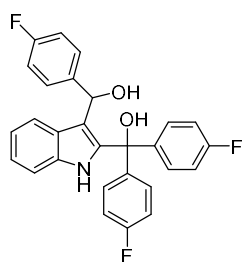

yield: 53% (1.22 g), yellow solid, m.p. 112-113 °C;  $^1\text{H}$  NMR (400 MHz,  $\text{CDCl}_3$ )  $\delta$  (ppm): 7.55 – 7.46 (m, 2H), 7.35 – 7.26 (m, 6H), 7.25 – 7.22 (m, 1H), 7.17 – 7.12 (m, 1H), 7.09 – 6.93 (m, 8H), 6.17 (s, 1H);  $^{13}\text{C}$  NMR (100 MHz,  $\text{CDCl}_3$ )  $\delta$  (ppm): 162.3(d,  $J = 246.2$  Hz), 140.4(d,  $J = 80.4$  Hz), 138.4, 133.8, 129.4(d,  $J = 8.2$  Hz), 129.2(d,  $J = 8.1$  Hz), 128.4(d,  $J = 8.2$  Hz), 127.3, 122.5, 120.3, 119.5, 115.2(d,  $J = 21.4$  Hz), 115.1(d,  $J = 21.4$  Hz), 113.7, 111.2, 77.9, 69.8; IR (KBr): 3750, 3123, 2360, 1733, 1653, 1507, 1275, 1260, 764, 750, 668  $\text{cm}^{-1}$ ; HRMS (ESI-TOF)  $m/z$ :  $[M - H]^-$  Calcd for  $\text{C}_{28}\text{H}_{19}\text{F}_3\text{NO}_2$  458.1368, Found 458.1373.

**bis(4-chlorophenyl)(3-((4-chlorophenyl)(hydroxy)methyl)-1*H*-indol-2-yl)methanol (1d):**

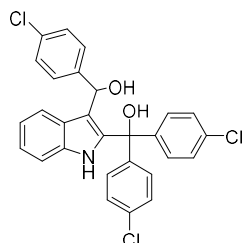

yield: 60% (1.52 g), white solid, m.p. 130-131 °C;  $^1\text{H}$  NMR (400 MHz,  $\text{CDCl}_3$ )  $\delta$  (ppm): 7.49 (s, 1H), 7.34 – 7.27 (m, 6H), 7.25 – 7.24 (m, 2H), 7.23 (d,  $J = 2.7$  Hz, 3H), 7.21 (s, 1H), 7.19 – 7.10 (m, 3H), 7.05 – 7.00 (m, 1H), 6.18 (s, 1H);  $^{13}\text{C}$  NMR (100 MHz,  $\text{CDCl}_3$ )  $\delta$  (ppm): 140.8, 134.2, 128.9, 128.8, 128.6, 128.5, 128.4, 127.9, 122.7, 120.5, 119.4, 111.3, 77.9, 69.7; IR (KBr): 3750, 3123, 2360, 1733, 1684, 1507, 1399, 1275, 1260, 764, 750, 668  $\text{cm}^{-1}$ ; HRMS (ESI-TOF)  $m/z$ :  $[M - H]^-$  Calcd for  $\text{C}_{28}\text{H}_{19}\text{Cl}_3\text{NO}_2$  506.0482, Found 506.0484.

**(5-chloro-3-((4-chlorophenyl)(hydroxy)methyl)-1*H*-indol-2-yl)bis(4-chlorophenyl)methanol**

**(1e):**

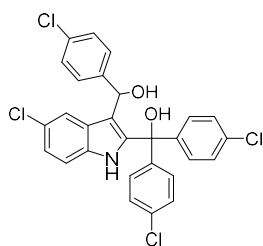

yield: 60% (1.62 g), yellow solid, m.p. 85-86 °C;  $^1\text{H}$  NMR (400 MHz,  $\text{CDCl}_3$ )  $\delta$  (ppm): 7.53 (s, 1H), 7.34 – 7.29 (m, 3H), 7.24 (s, 3H), 7.22 (s, 2H), 7.20 (s, 2H), 7.19 – 7.17 (m, 2H), 7.17 – 7.15 (m, 2H), 7.13 – 7.10 (m, 2H), 7.08 – 7.02 (m, 1H), 6.10 (s, 1H);  $^{13}\text{C}$  NMR (100 MHz,  $\text{CDCl}_3$ )

$\delta$  (ppm): 144.0, 142.9, 140.8, 140.4, 134.3, 134.2, 133.7, 132.0, 128.9, 128.8, 128.7, 128.6, 128.4, 128.3, 127.9, 127.8, 126.3, 123.1, 118.8, 113.3, 112.4, 77.9, 69.5; IR (KBr): 3750, 3122, 2359, 1733, 1669, 1521, 1399, 1275, 1260, 764, 750, 668  $\text{cm}^{-1}$ ; HRMS (ESI-TOF)  $m/z$ :  $[\text{M} - \text{H}]^-$  Calcd for  $\text{C}_{28}\text{H}_{18}\text{Cl}_4\text{NO}_2$  540.0092, Found 540.0102.

**(6-chloro-3-((4-chlorophenyl)(hydroxy)methyl)-1H-indol-2-yl)bis(4-chlorophenyl)methanol**

**(1f):**

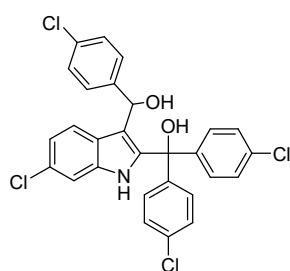

yield: 57% (1.54 g), yellow solid, m.p. 92-93  $^{\circ}\text{C}$ ;  $^1\text{H}$  NMR (400 MHz,  $\text{CDCl}_3$ )  $\delta$  (ppm): 7.50 (s, 1H), 7.35 – 7.30 (m, 3H), 7.28 – 7.27 (m, 2H), 7.25 – 7.23 (m, 4H), 7.22 – 7.17 (m, 7H), 6.97 (d,  $J = 1.2$  Hz, 2H), 6.10 (s, 1H);  $^{13}\text{C}$  NMR (100 MHz,  $\text{CDCl}_3$ )  $\delta$  (ppm): 143.9, 142.9, 140.6, 140.2, 134.4, 134.3, 134.1, 133.6, 128.8, 128.7, 128.6, 128.5,

127.8, 125.7, 121.3, 120.4, 113.8, 111.2, 77.9, 69.5; IR (KBr): 3750, 3005, 2359, 1733, 1683, 1540, 1436, 1275, 1260, 764, 750, 668  $\text{cm}^{-1}$ ; HRMS (ESI-TOF)  $m/z$ :  $[\text{M} - \text{H}]^-$  Calcd for  $\text{C}_{28}\text{H}_{18}\text{Cl}_4\text{NO}_2$  540.0092, Found 540.0091.

**(3-(hydroxy(phenyl)methyl)-1-methyl-1H-indol-2-yl)diphenylmethanol (1g):**

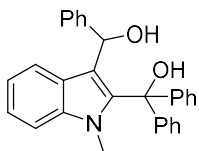

yield: 55% (1.15 g), red solid, m.p. 43-44  $^{\circ}\text{C}$ ;  $^1\text{H}$  NMR (400 MHz,  $\text{CDCl}_3$ )  $\delta$  (ppm): 7.45 (d,  $J = 8.0$  Hz, 1H), 7.40 – 7.32 (m, 8H), 7.28 (s, 1H), 7.25 – 7.21 (m, 5H), 7.18 (m, 3H), 7.09 – 7.04 (m, 1H), 5.82 (s, 1H), 3.23 (s, 3H);  $^{13}\text{C}$

NMR (100 MHz,  $\text{CDCl}_3$ )  $\delta$  (ppm): 146.5, 143.1, 143.0, 142.5, 140.9, 128.5, 128.4, 128.2, 128.1, 128.0, 127.9, 127.8, 127.7, 121.6, 121.4, 120.0, 119.2, 118.9, 109.9, 88.6, 81.4, 31.0; IR (KBr): 3752, 3415, 2360, 1636, 1617, 1541, 1507, 1275, 1261, 764, 749, 618  $\text{cm}^{-1}$ ; HRMS (ESI-TOF)  $m/z$ :  $[\text{M} - \text{H}]^-$  Calcd for  $\text{C}_{29}\text{H}_{24}\text{NO}_2$  418.1807, Found 418.1804.

**(2-benzhydryl-1H-indol-3-yl)(phenyl)methanol (1h):**

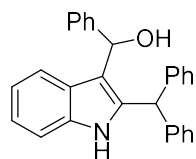

yield: 50% (0.97 g), yellow solid, m.p. 51-52  $^{\circ}\text{C}$ ;  $^1\text{H}$  NMR (400 MHz,  $\text{CDCl}_3$ )  $\delta$  (ppm): 7.65 (s, 1H), 7.43 (d,  $J = 8.0$  Hz, 1H), 7.37 (d,  $J = 7.6$  Hz, 2H), 7.34 – 7.28 (m, 6H), 7.25 – 7.18 (m, 4H), 7.15 – 7.09 (m, 5H), 7.00 (m, 1H), 6.21 (d,



$J = 3.8$  Hz, 1H), 5.91 (s, 1H);  $^{13}\text{C}$  NMR (100 MHz,  $\text{CDCl}_3$ )  $\delta$  (ppm): 143.3, 141.9, 141.8, 137.3, 128.9, 128.8, 128.7, 128.1, 127.2, 127.1, 126.8, 126.0, 121.8, 119.9, 115.0, 110.8, 68.8, 48.3; IR (KBr): 3415, 2360, 2342, 1636, 1617, 1559, 1430, 1275, 1261, 749, 668  $\text{cm}^{-1}$ ; HRMS (ESI-TOF)  $m/z$ :  $[\text{M} - \text{H}]^-$  Calcd for  $\text{C}_{28}\text{H}_{22}\text{NO}$  388.1702, Found 388.1699.

## 2. NMR spectra of products 3

### $^1\text{H}$ NMR (400 MHz, $\text{CDCl}_3$ ) of compound **3aa**

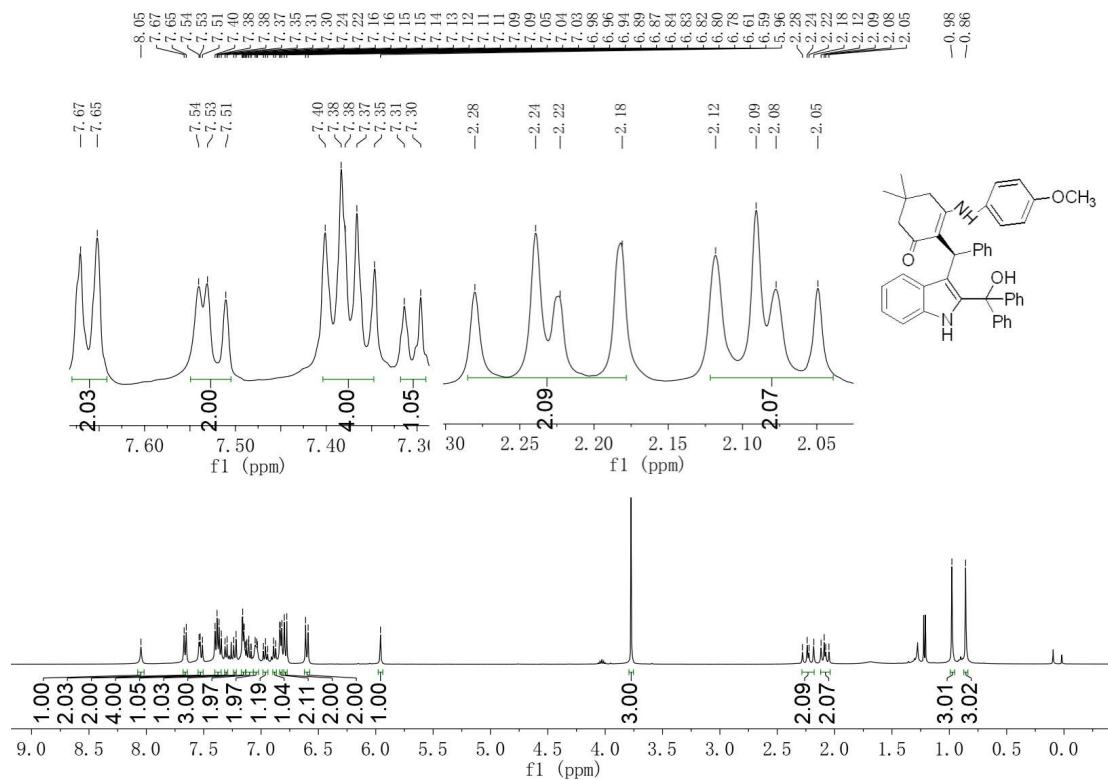

### $^{13}\text{C}$ NMR (100 MHz, $\text{CDCl}_3$ ) of compound **3aa**

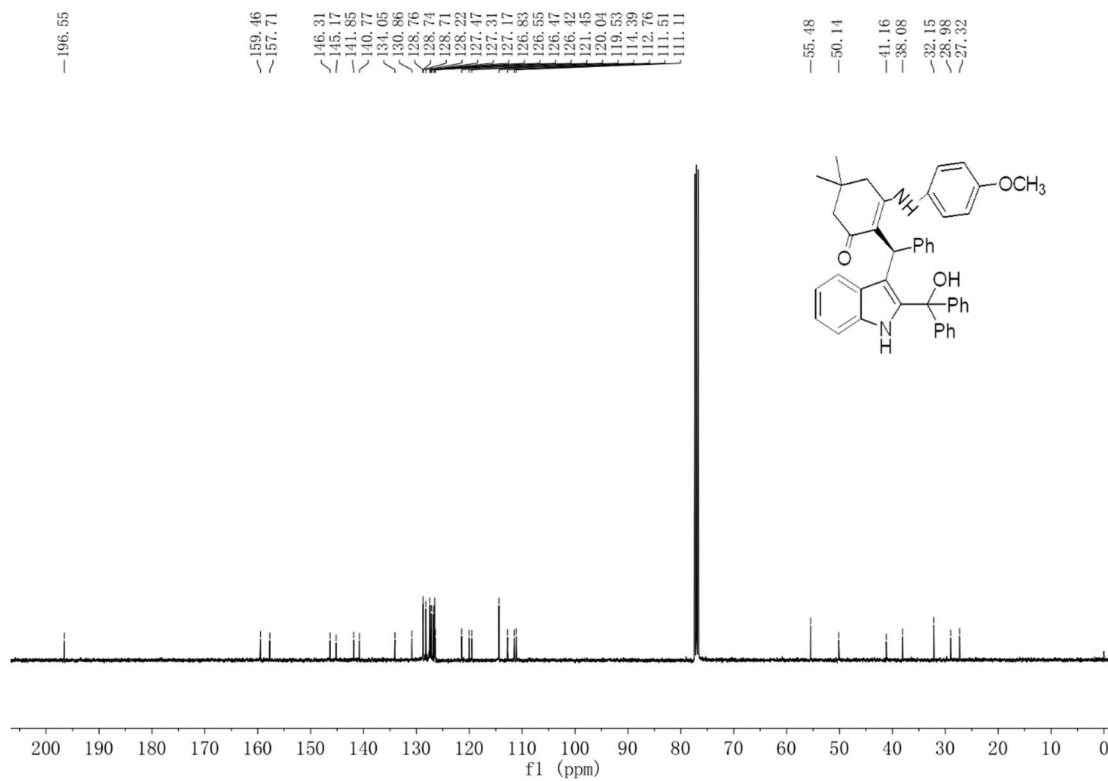

$^1\text{H}$  NMR (400 MHz,  $\text{CDCl}_3$ ) of compound **3ab**

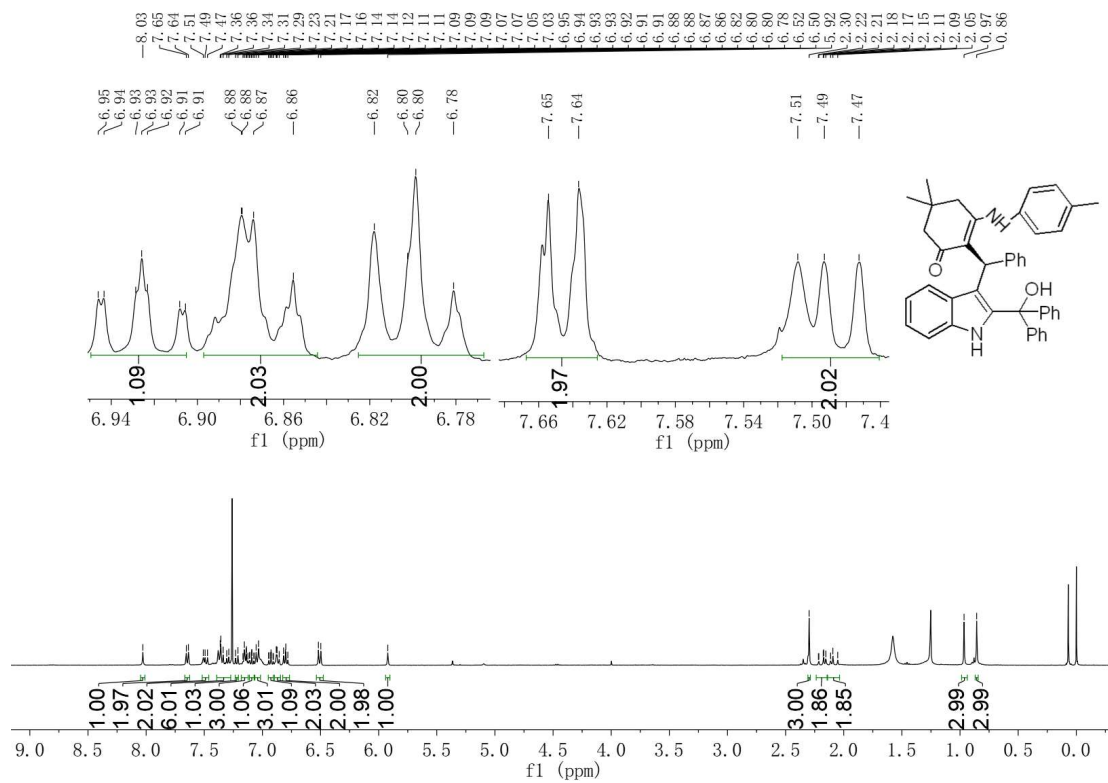

$^{13}\text{C}$  NMR (100 MHz,  $\text{CDCl}_3$ ) of compound **3ab**

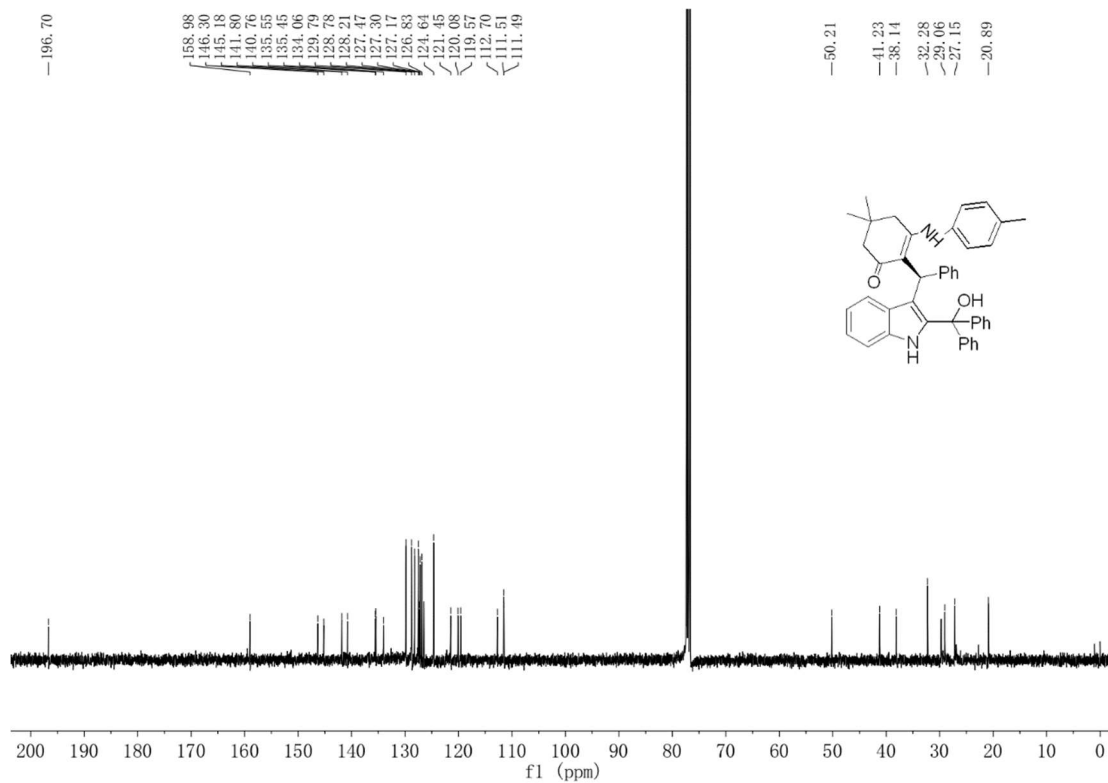

$^1\text{H}$  NMR (400 MHz,  $\text{CDCl}_3$ ) of compound **3ac**

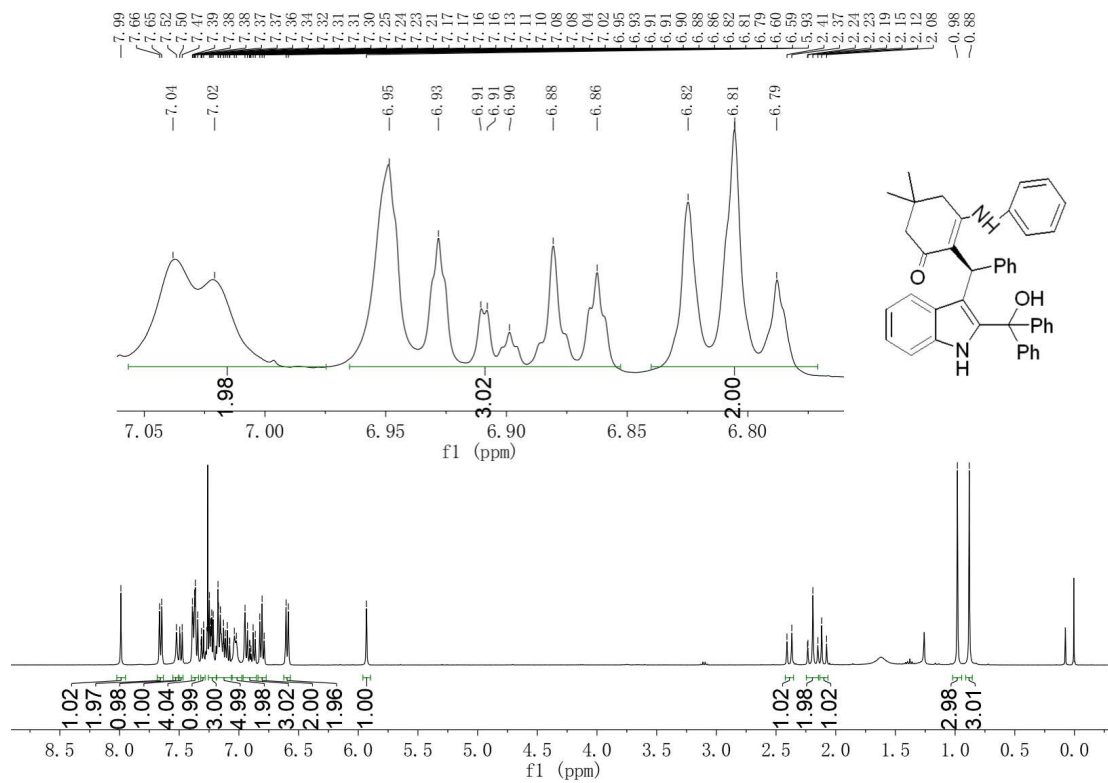

$^{13}\text{C}$  NMR (100 MHz,  $\text{CDCl}_3$ ) of compound **3ac**

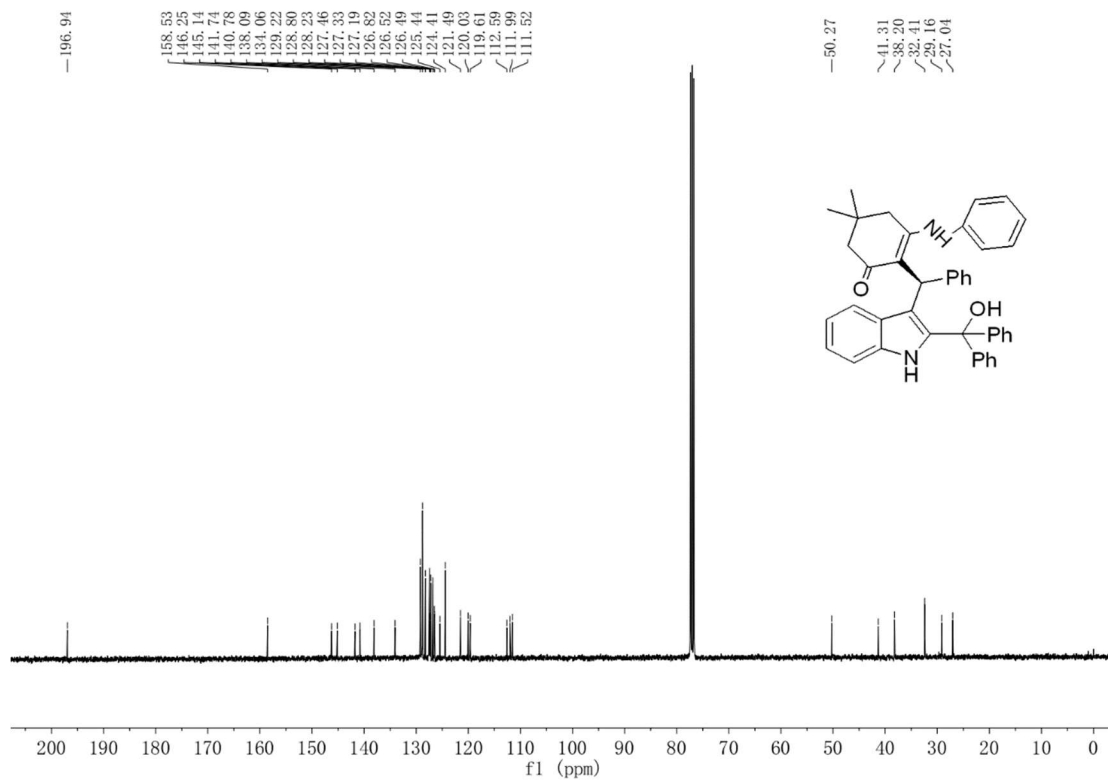

$^1\text{H}$  NMR (400 MHz,  $\text{CDCl}_3$ ) of compound **3ad**

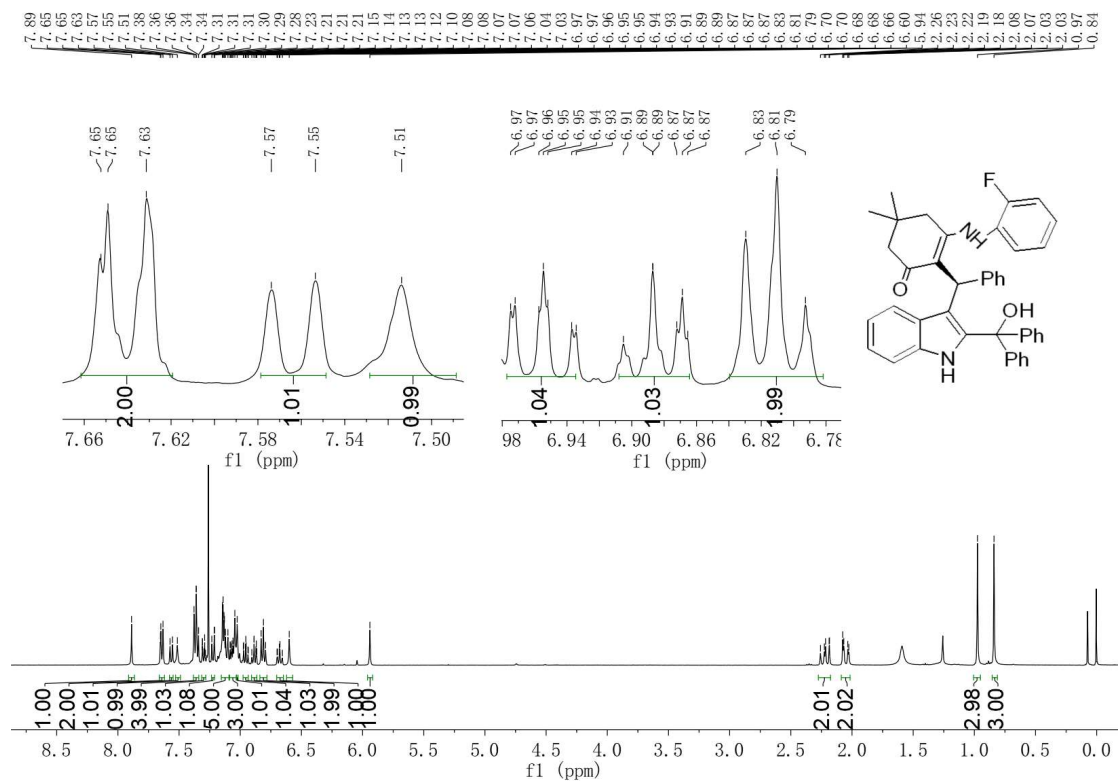

$^{13}\text{C}$  NMR (100 MHz,  $\text{CDCl}_3$ ) of compound **3ad**

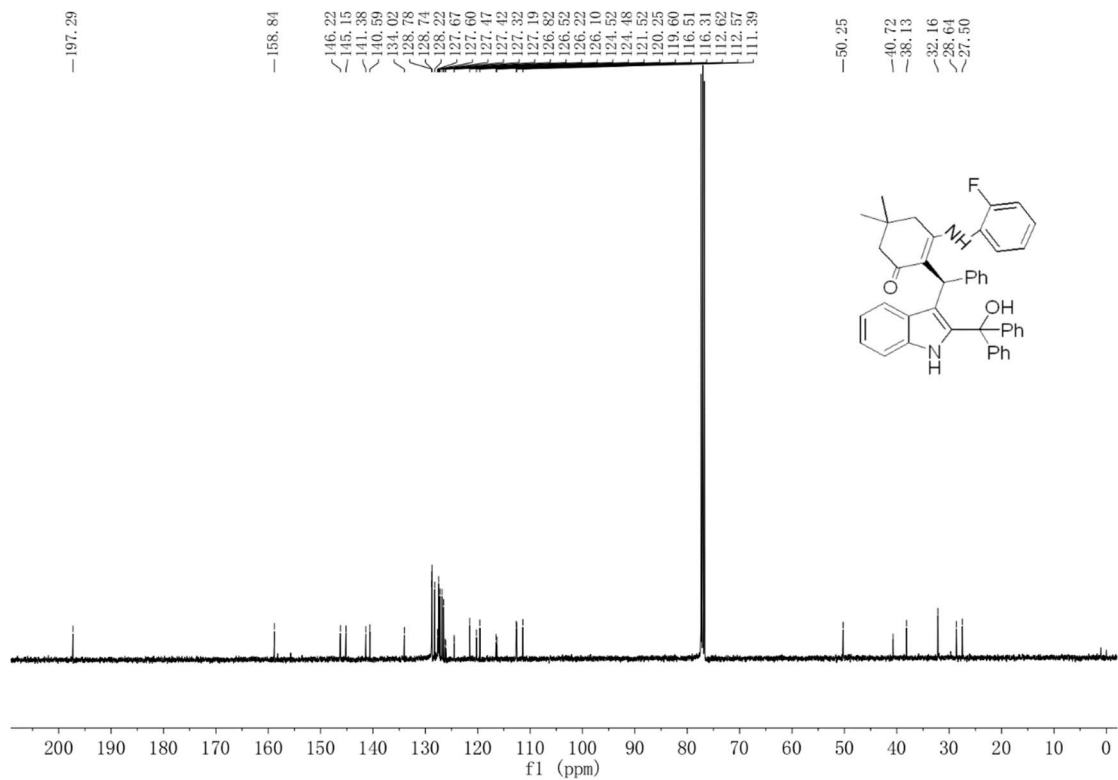

$^1\text{H}$  NMR (400 MHz,  $\text{CDCl}_3$ ) of compound **3ae**

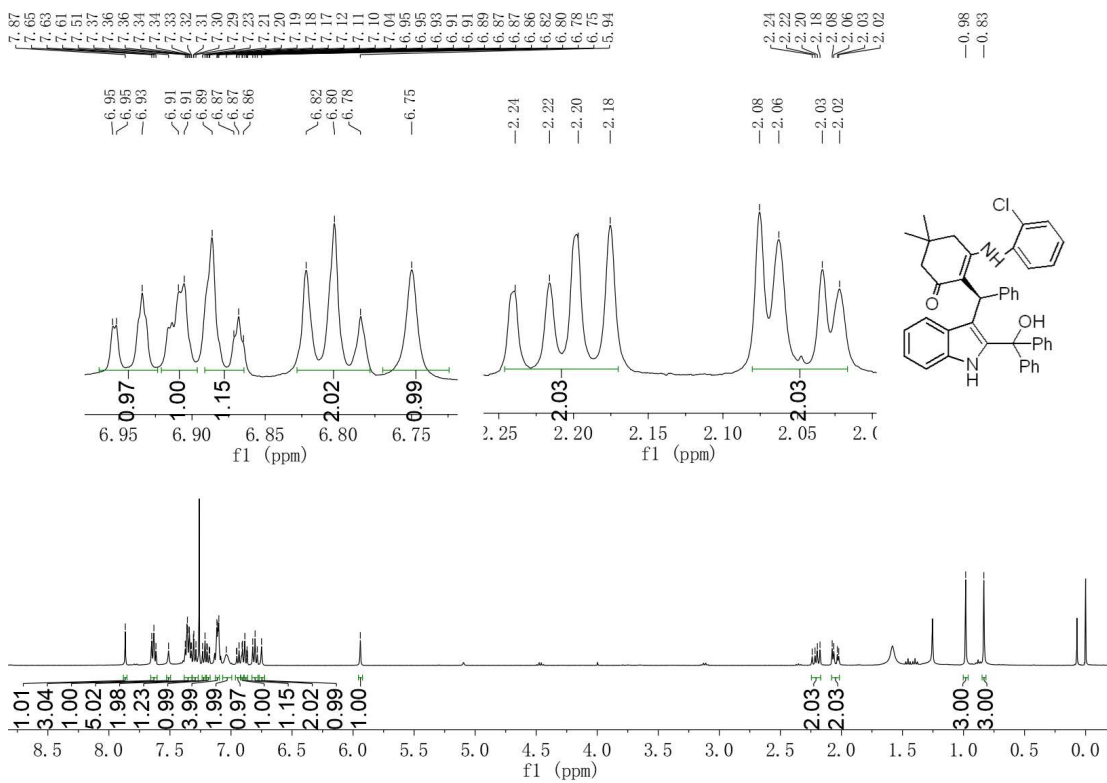

$^{13}\text{C}$  NMR (100 MHz,  $\text{CDCl}_3$ ) of compound **3ae**

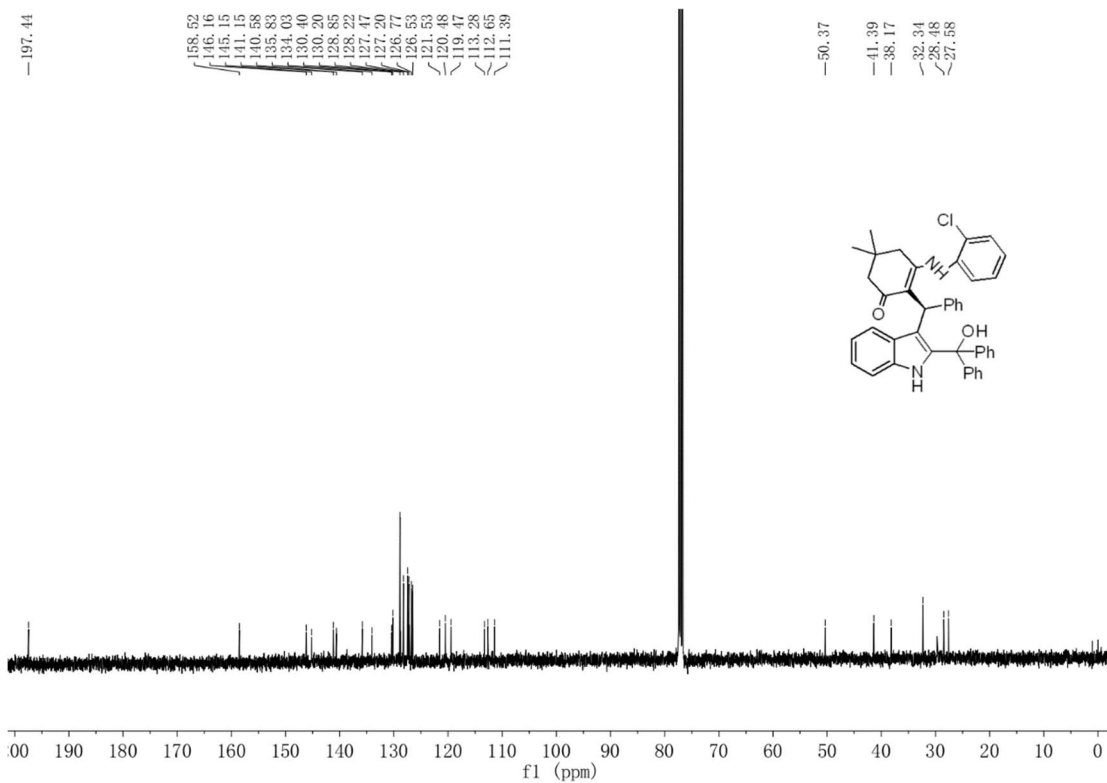

$^1\text{H}$  NMR (400 MHz,  $\text{CDCl}_3$ ) of compound **3af**

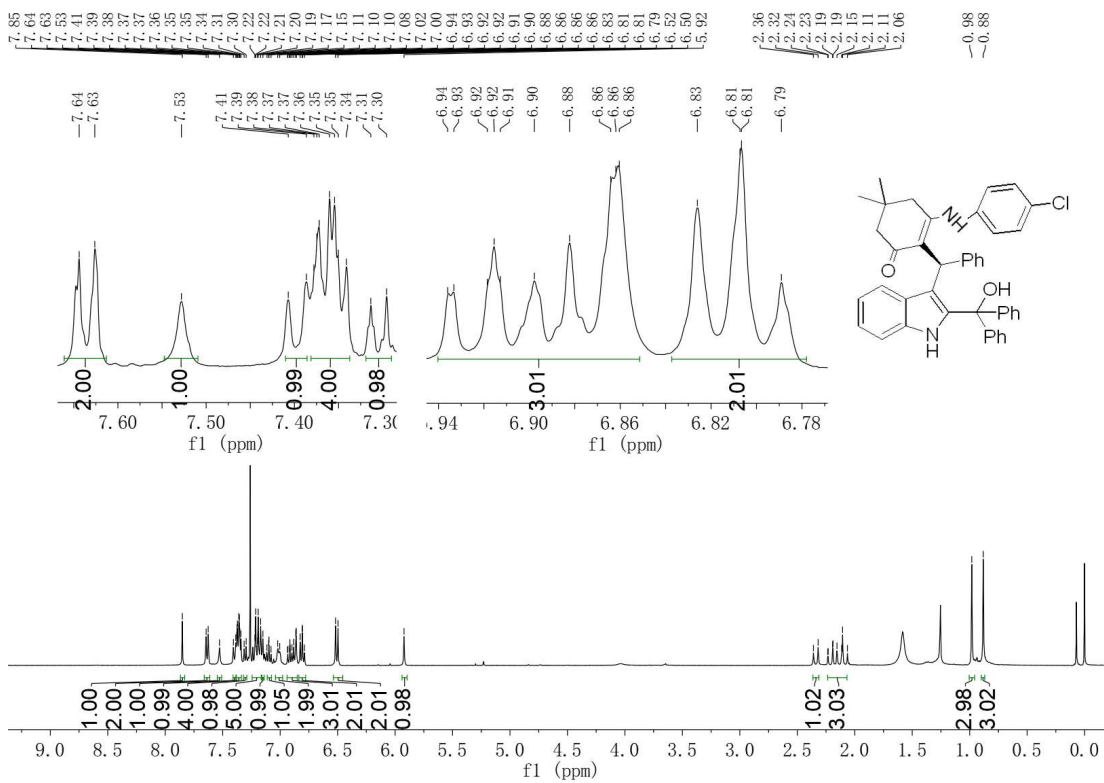

$^{13}\text{C}$  NMR (100 MHz,  $\text{CDCl}_3$ ) of compound **3af**

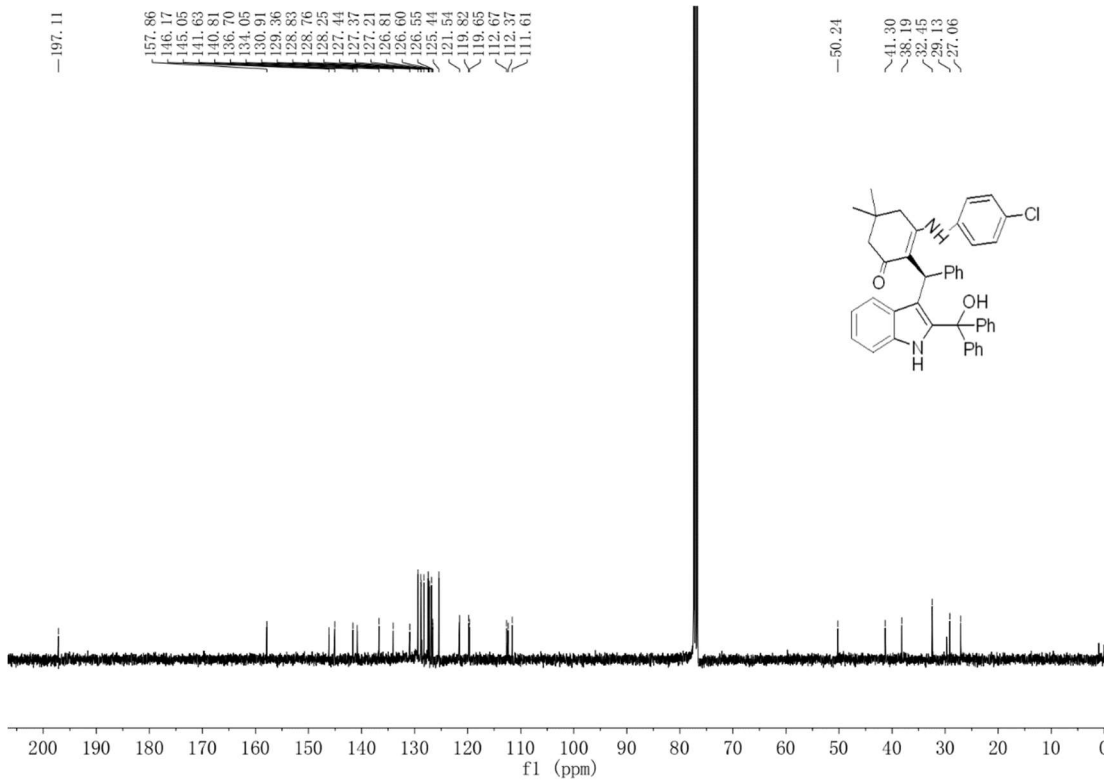

$^1\text{H}$  NMR (400 MHz,  $\text{CDCl}_3$ ) of compound **3ag**

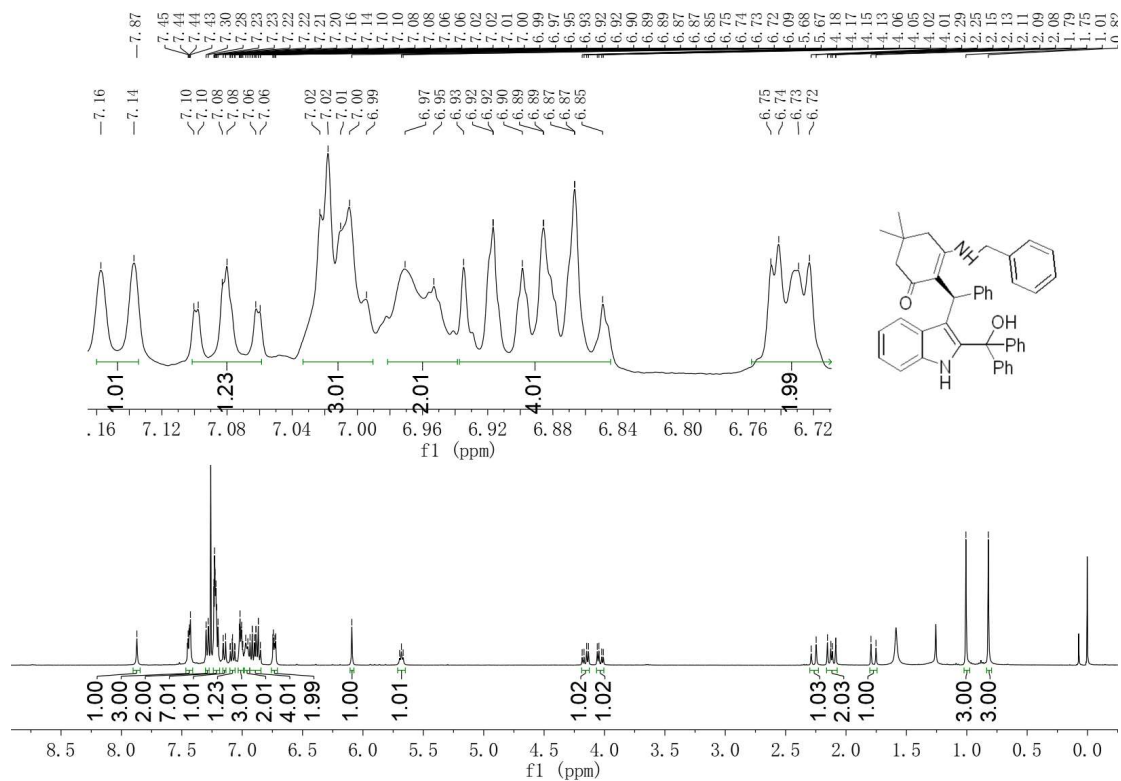

$^{13}\text{C}$  NMR (100 MHz,  $\text{CDCl}_3$ ) of compound **3ag**

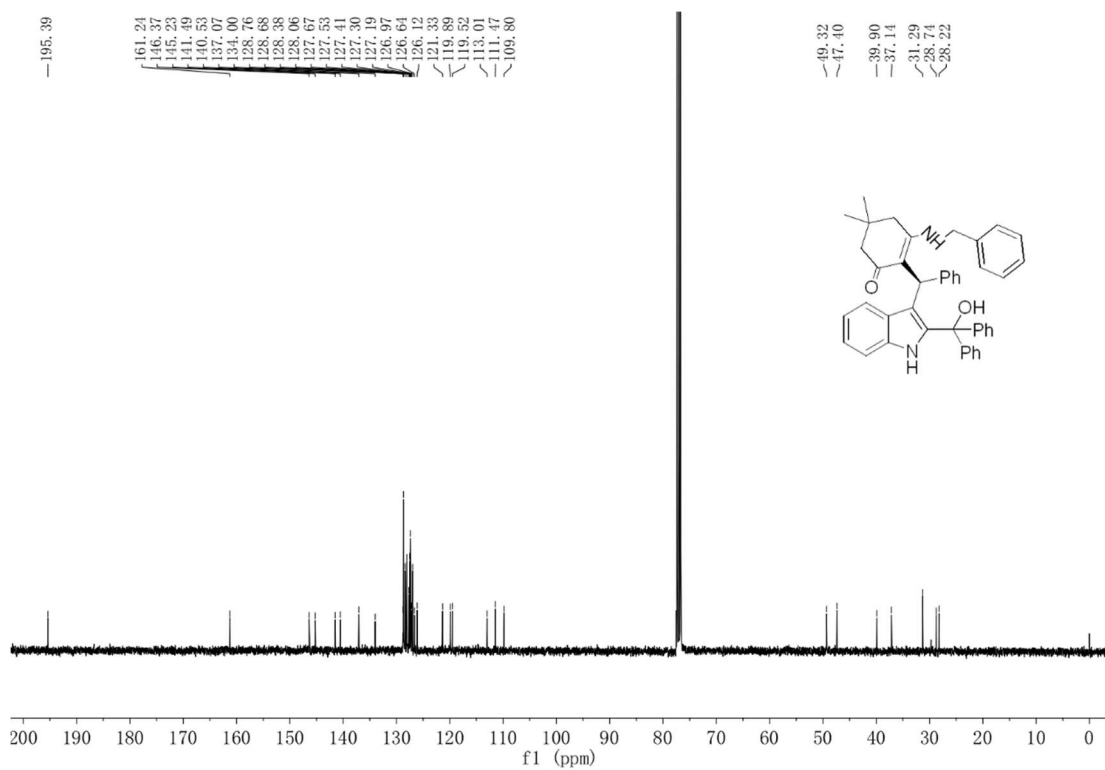



$^1\text{H}$  NMR (400 MHz,  $\text{CDCl}_3$ ) of compound **3ba**

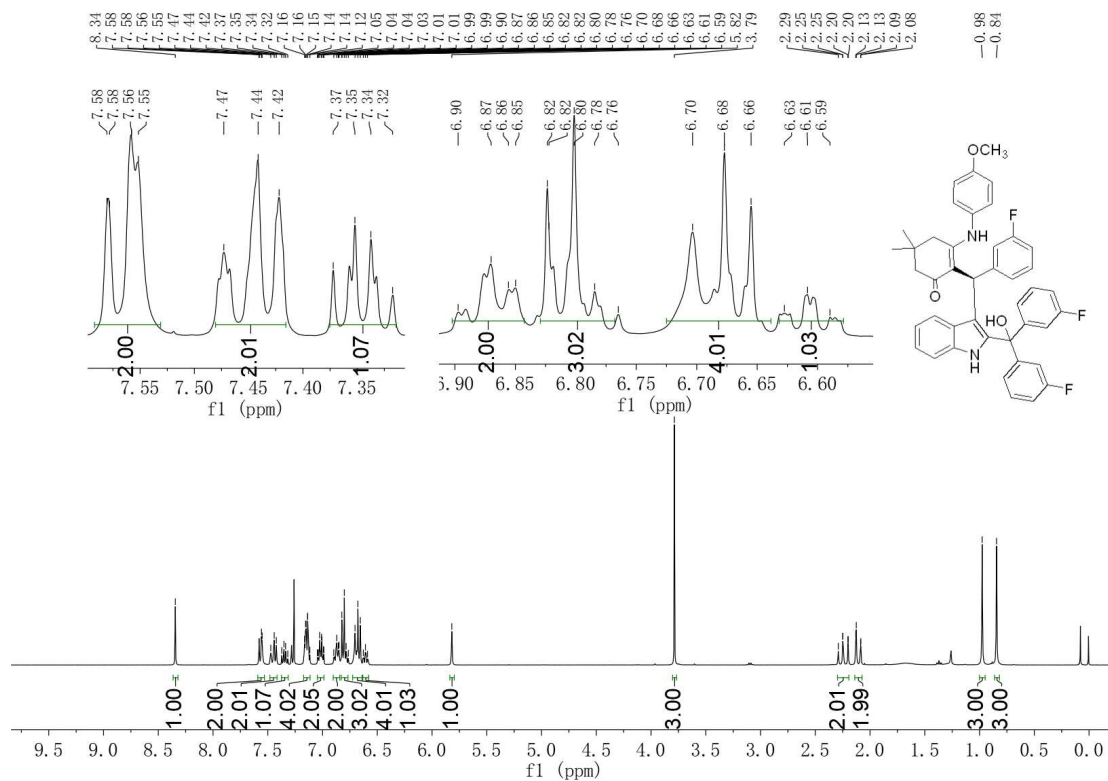

$^{13}\text{C}$  NMR (100 MHz,  $\text{CDCl}_3$ ) of compound **3ba**

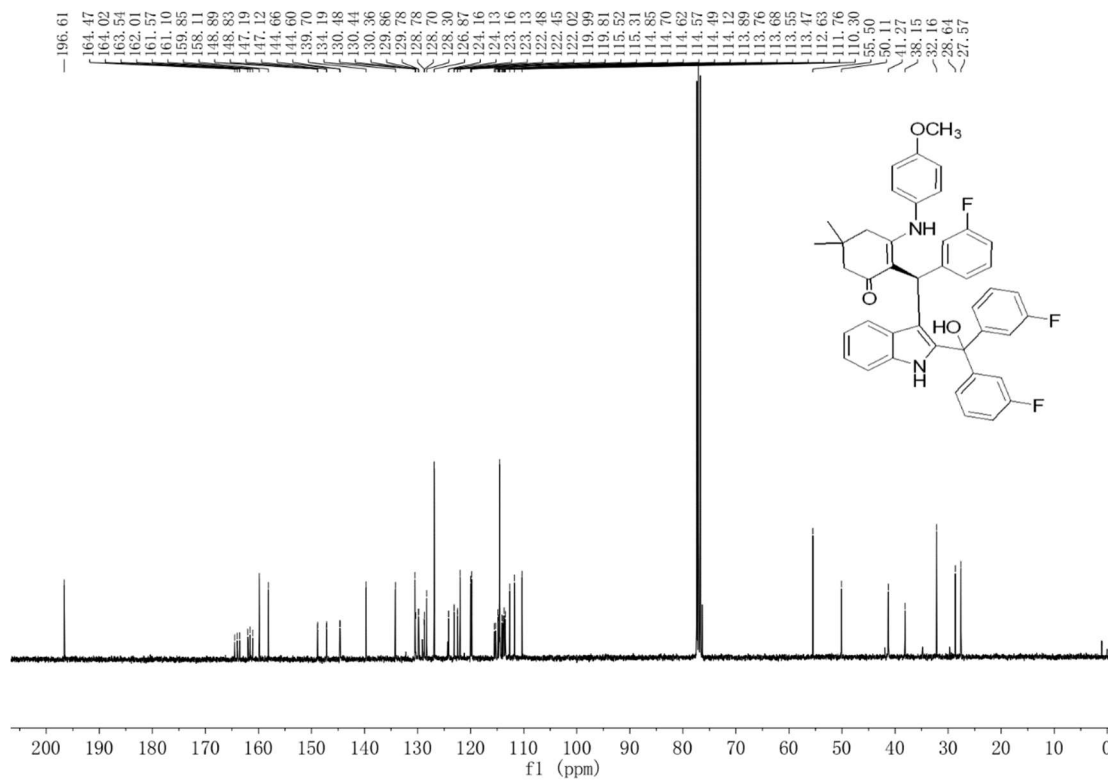

$^1\text{H}$  NMR (400 MHz,  $\text{CDCl}_3$ ) of compound **3ca**

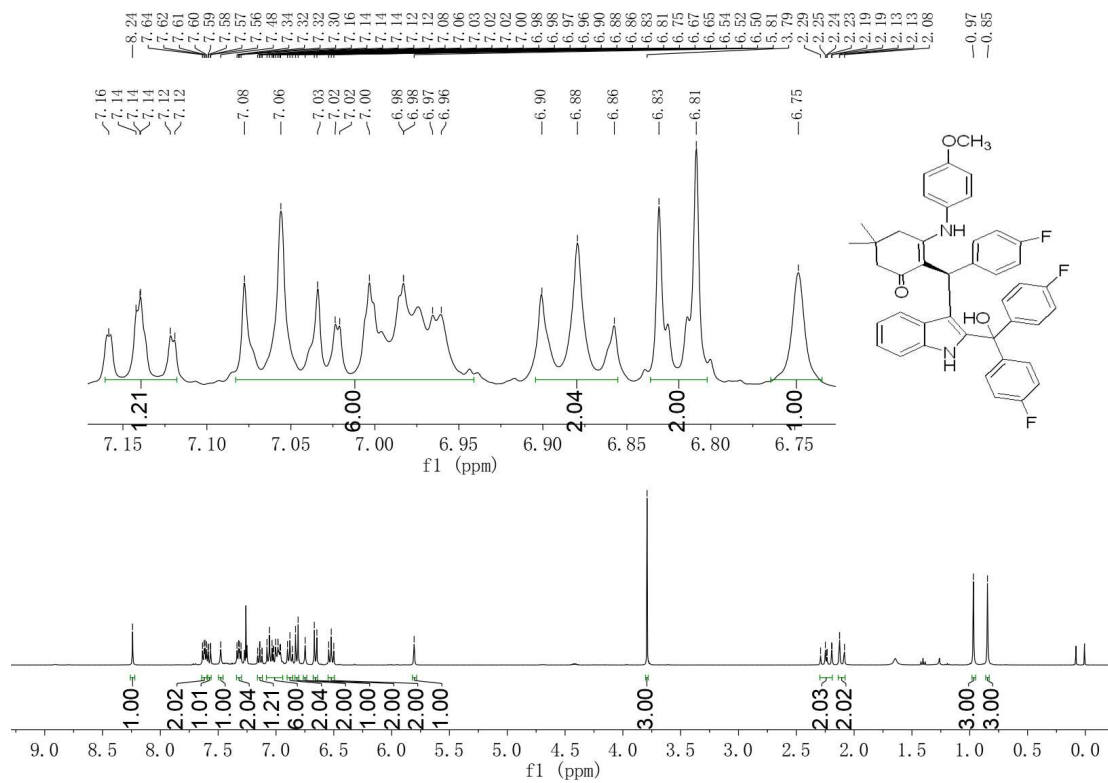

$^{13}\text{C}$  NMR (100 MHz,  $\text{CDCl}_3$ ) of compound **3ca**

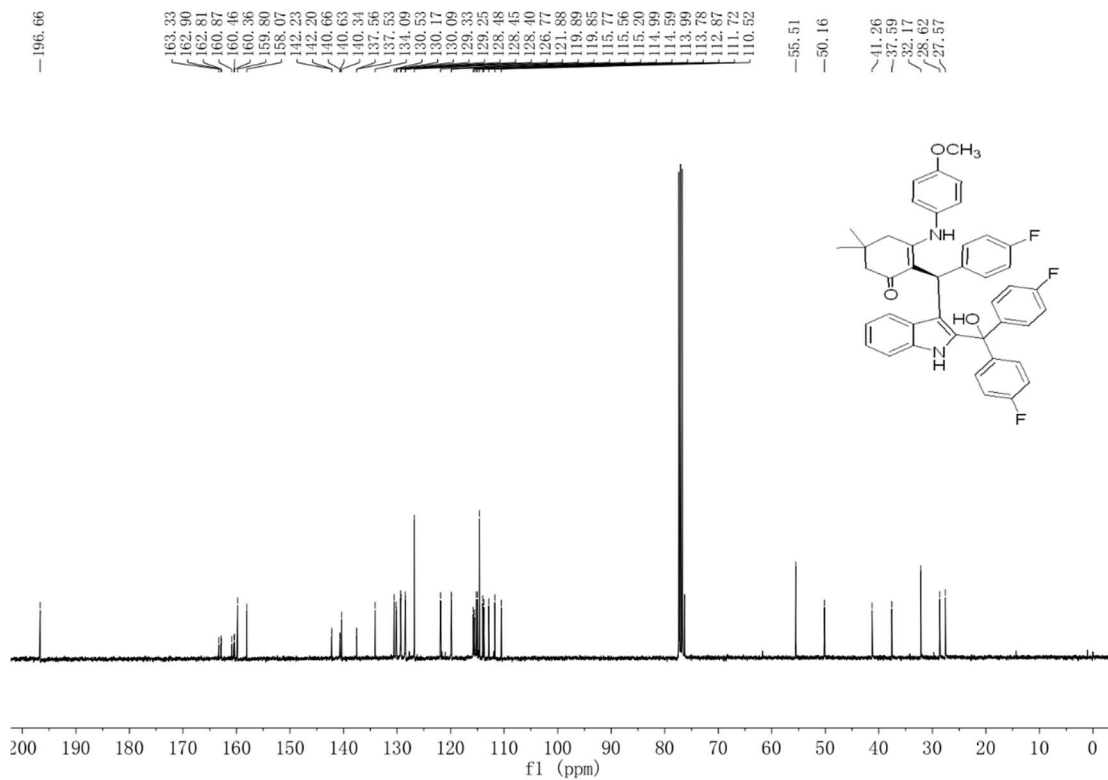

$^1\text{H}$  NMR (400 MHz,  $\text{CDCl}_3$ ) of compound **3da**

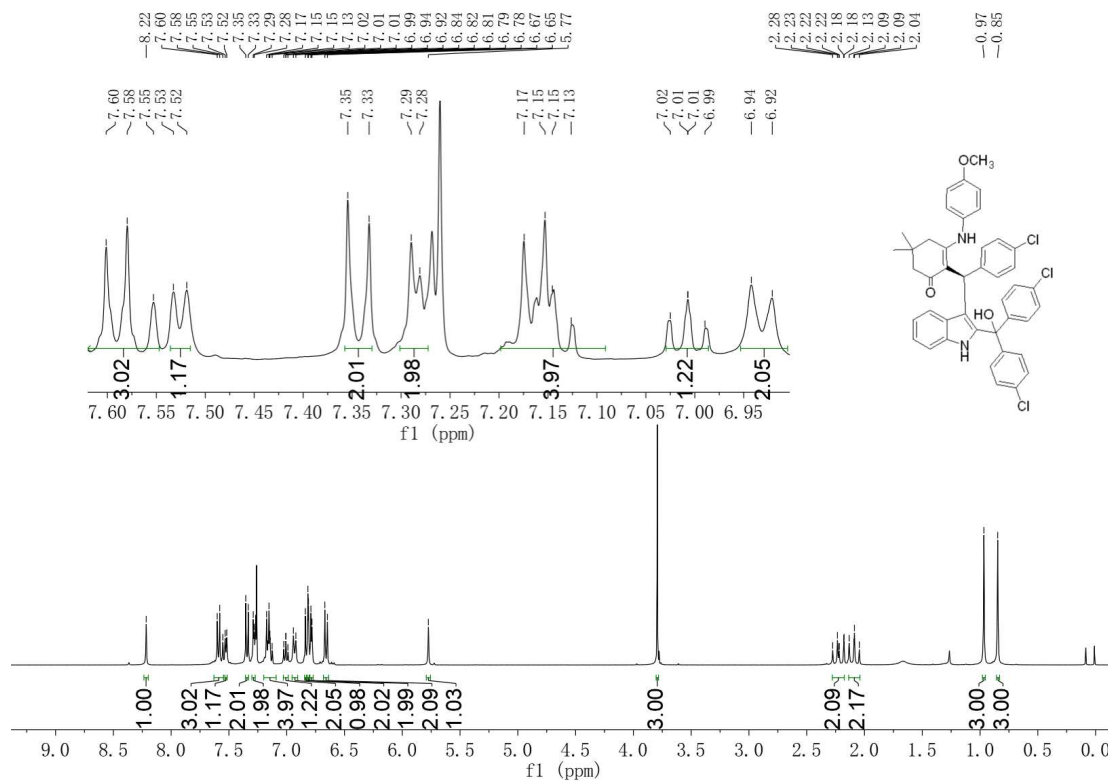

$^{13}\text{C}$  NMR (100 MHz,  $\text{CDCl}_3$ ) of compound **3da**

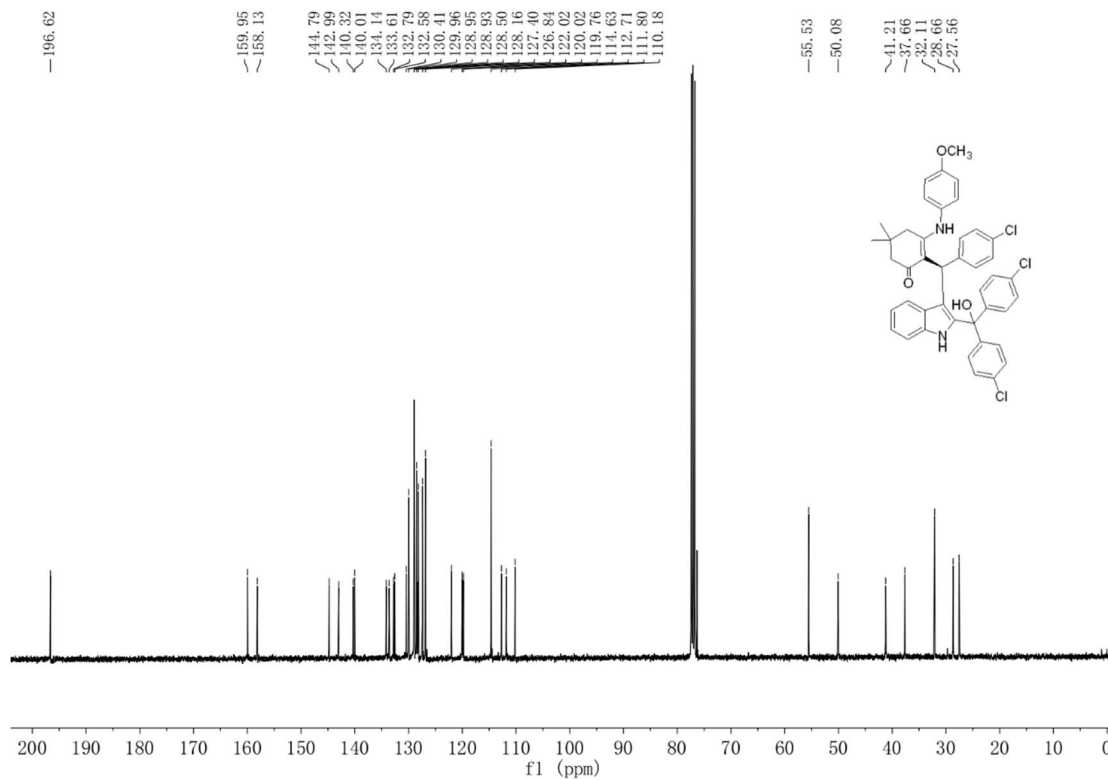

$^1\text{H}$  NMR (400 MHz,  $\text{CDCl}_3$ ) of compound **3dh**

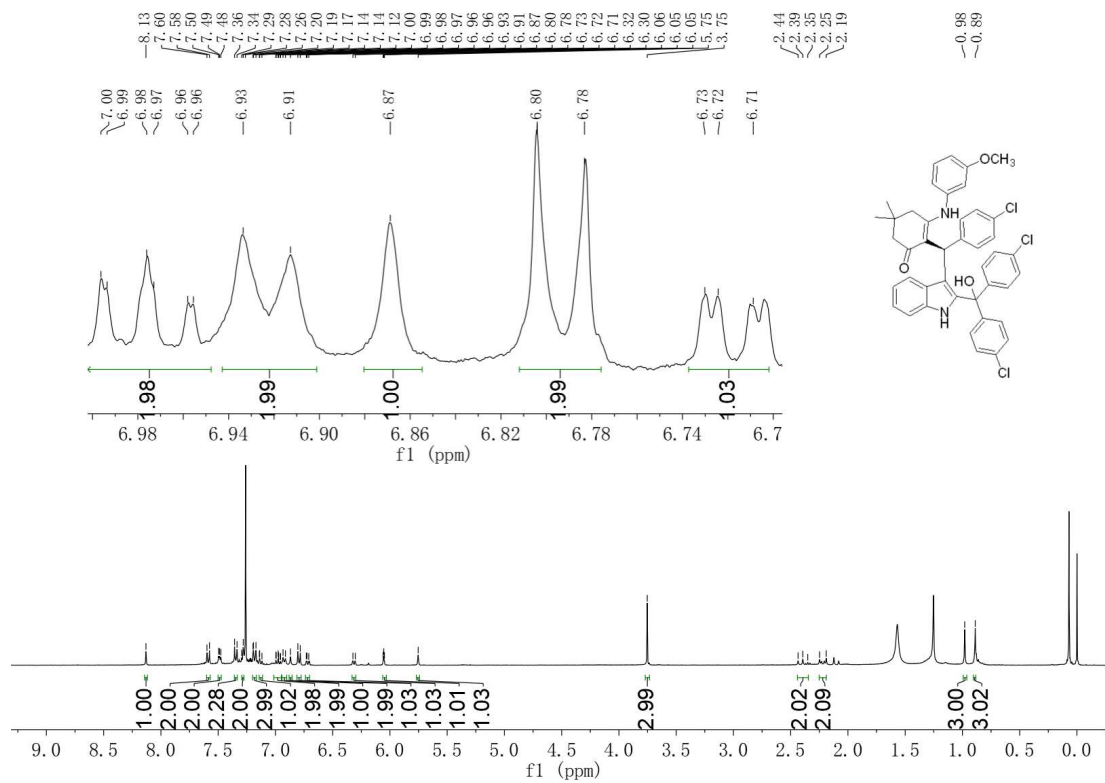

$^{13}\text{C}$  NMR (100 MHz,  $\text{CDCl}_3$ ) of compound **3dh**

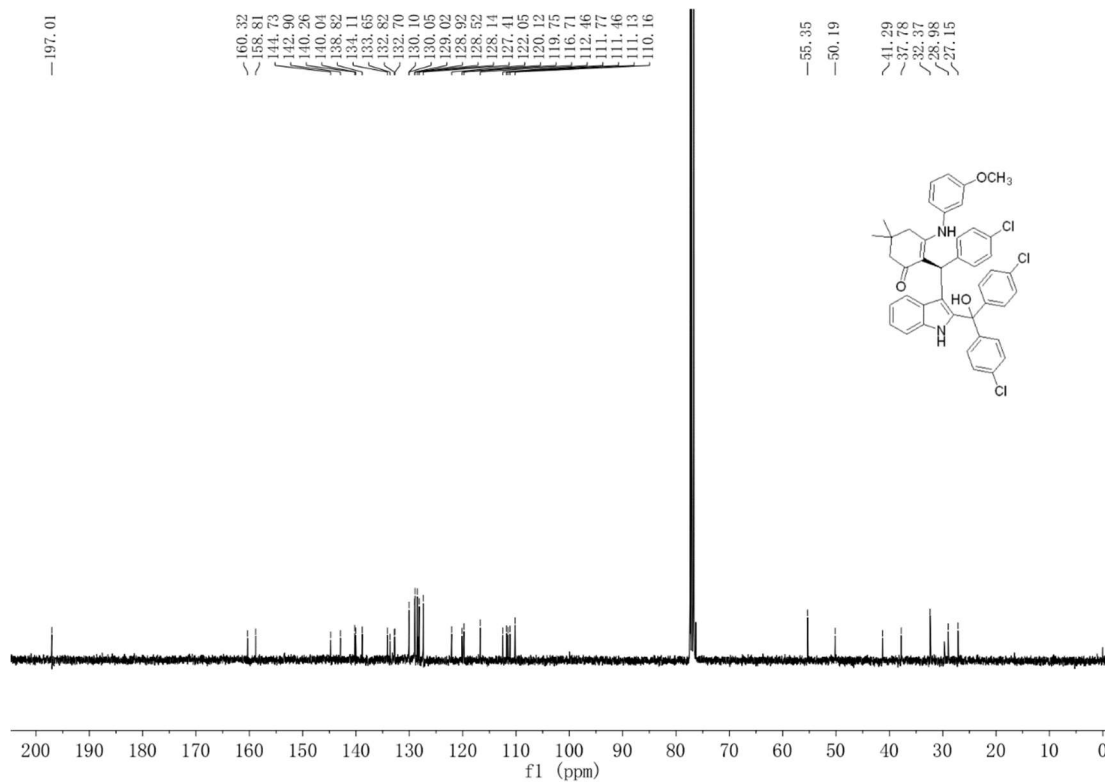

$^1\text{H}$  NMR (400 MHz,  $\text{CDCl}_3$ ) of compound **3dc**

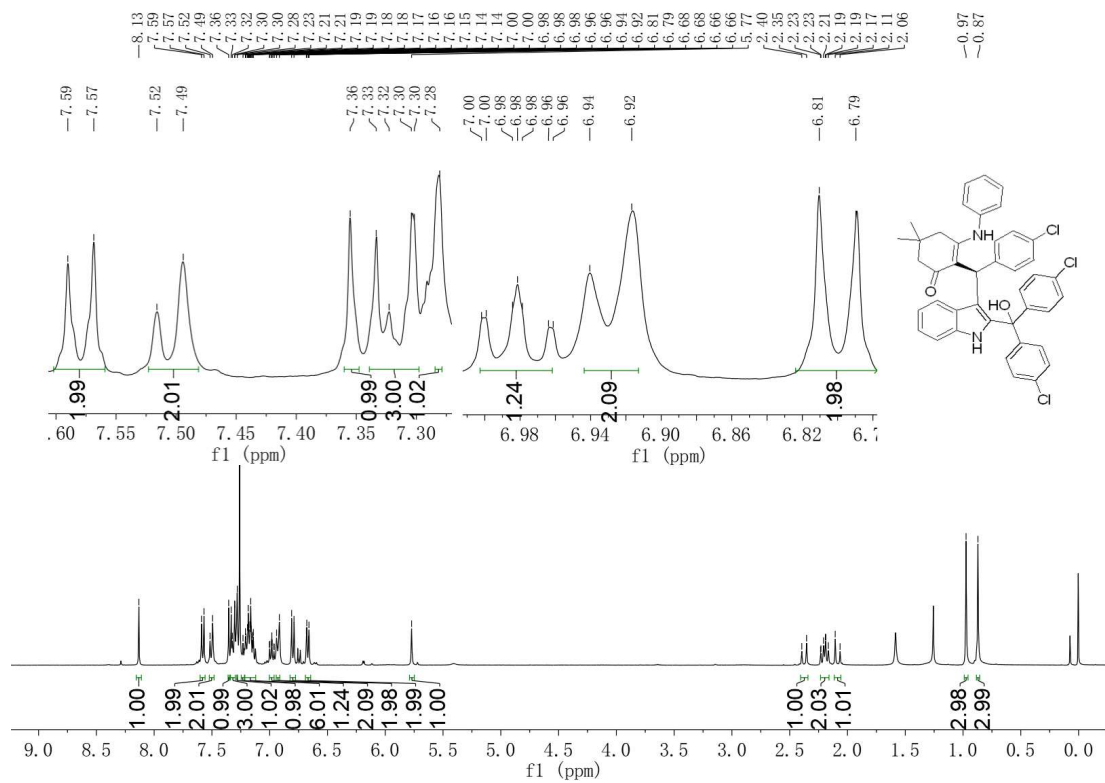

$^{13}\text{C}$  NMR (100 MHz,  $\text{CDCl}_3$ ) of compound **3dc**

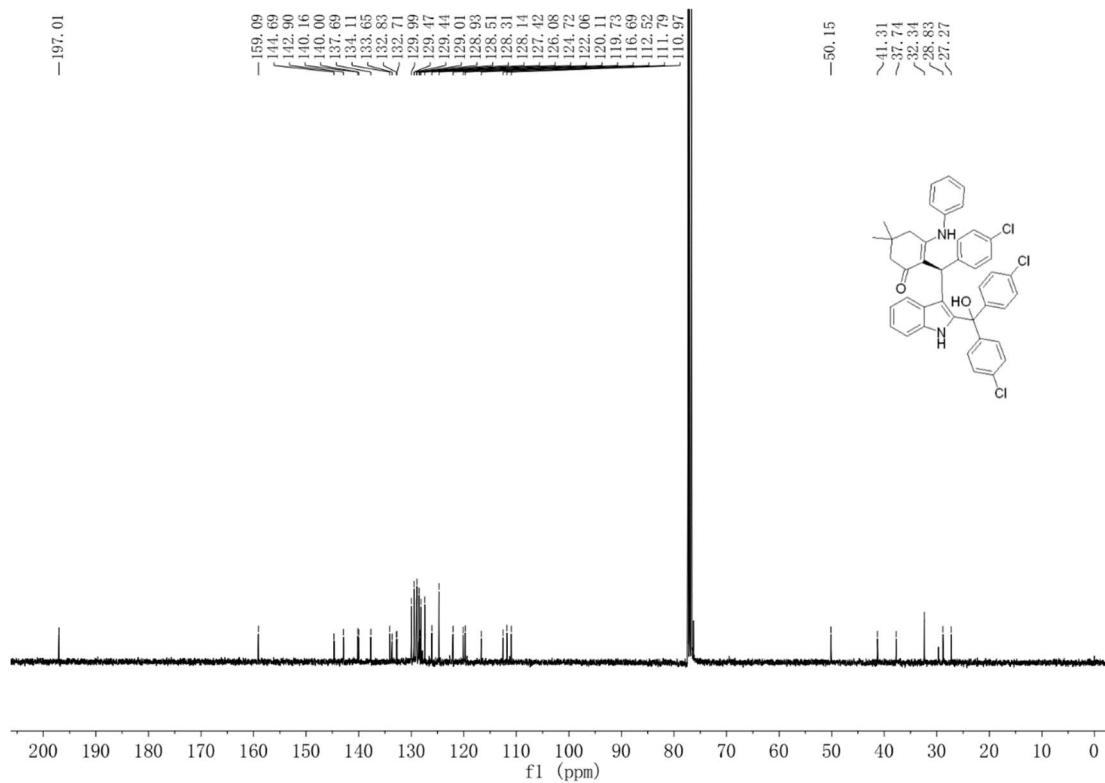

$^1\text{H}$  NMR (400 MHz,  $\text{CDCl}_3$ ) of compound **3df**

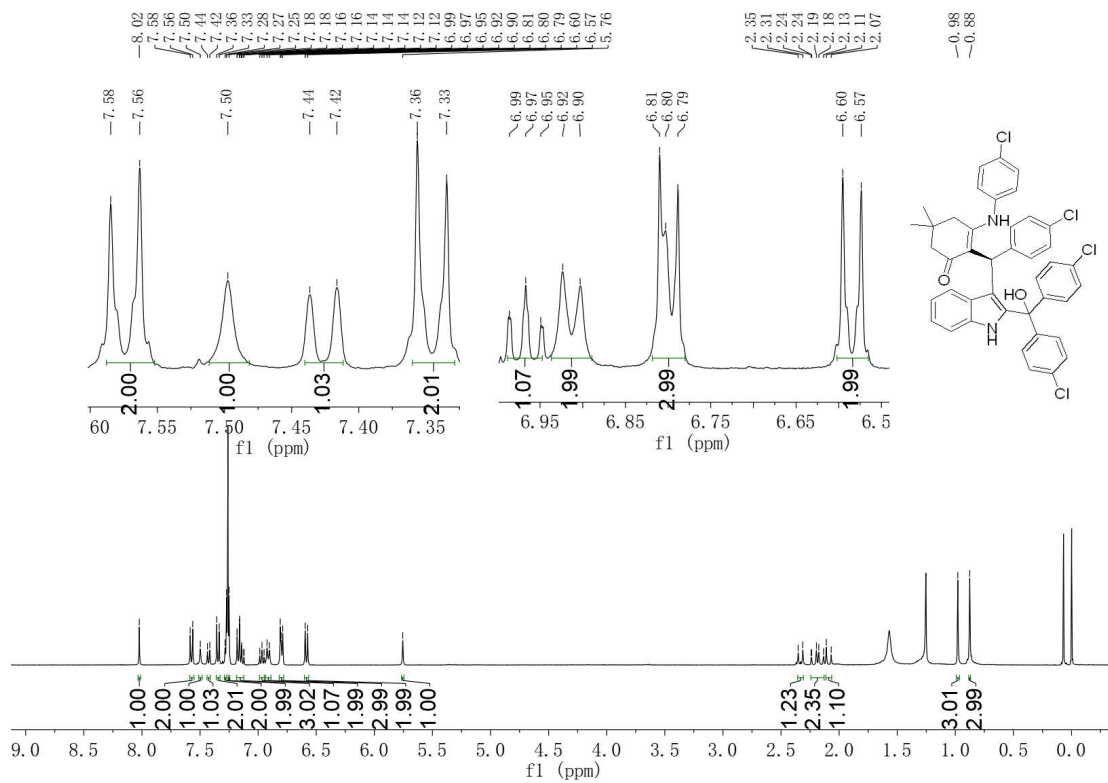

$^{13}\text{C}$  NMR (100 MHz,  $\text{CDCl}_3$ ) of compound **3df**

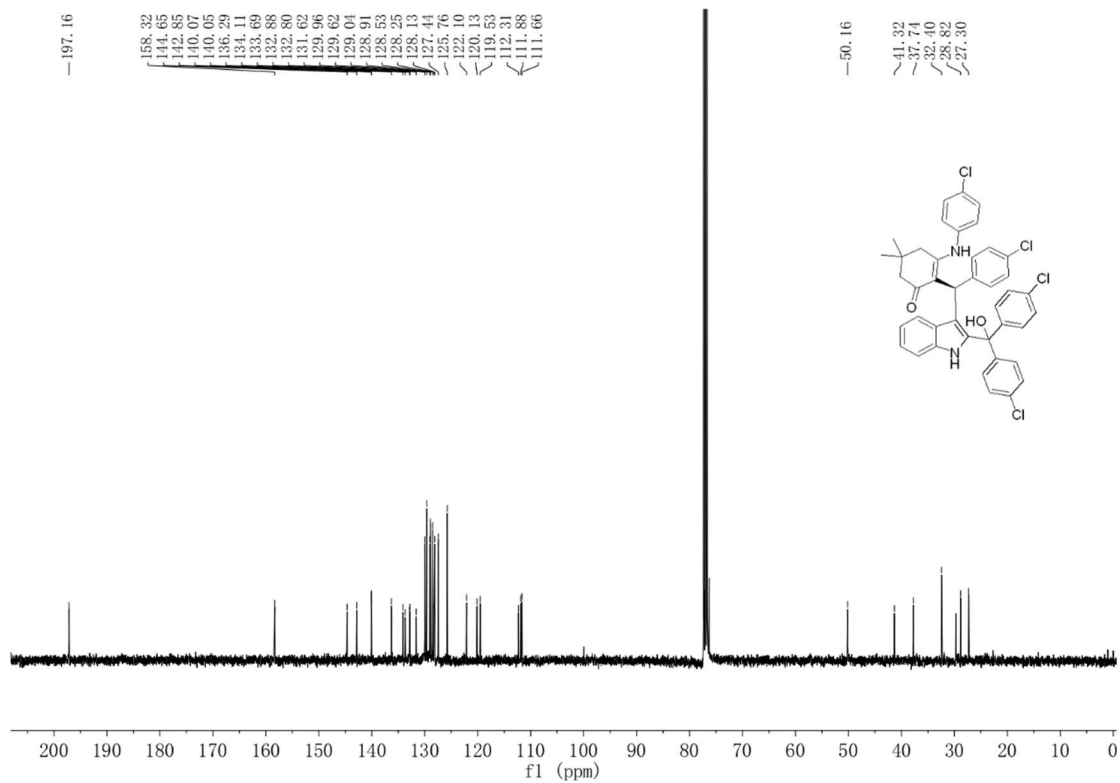

<sup>1</sup>H NMR (400 MHz, CDCl<sub>3</sub>) of compound **3dg**

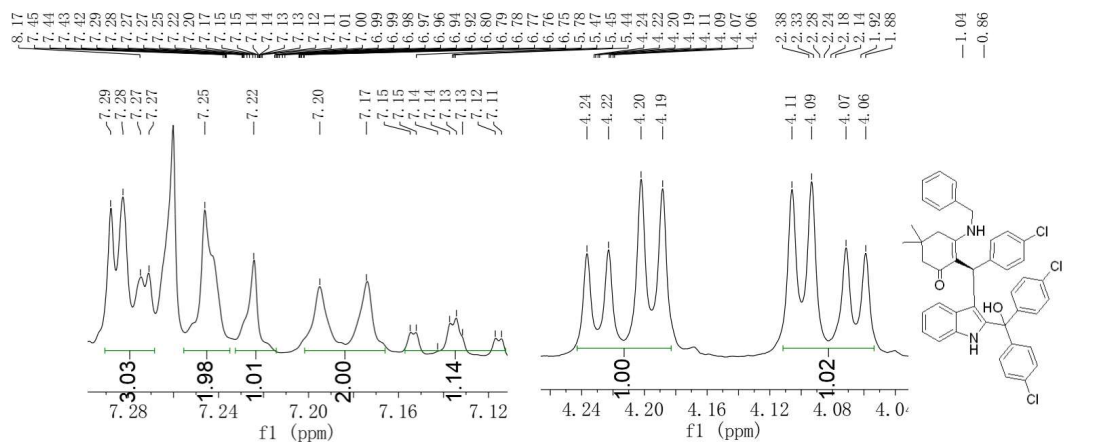

<sup>1</sup>H NMR (400 MHz, CDCl<sub>3</sub>) of compound **3ea**

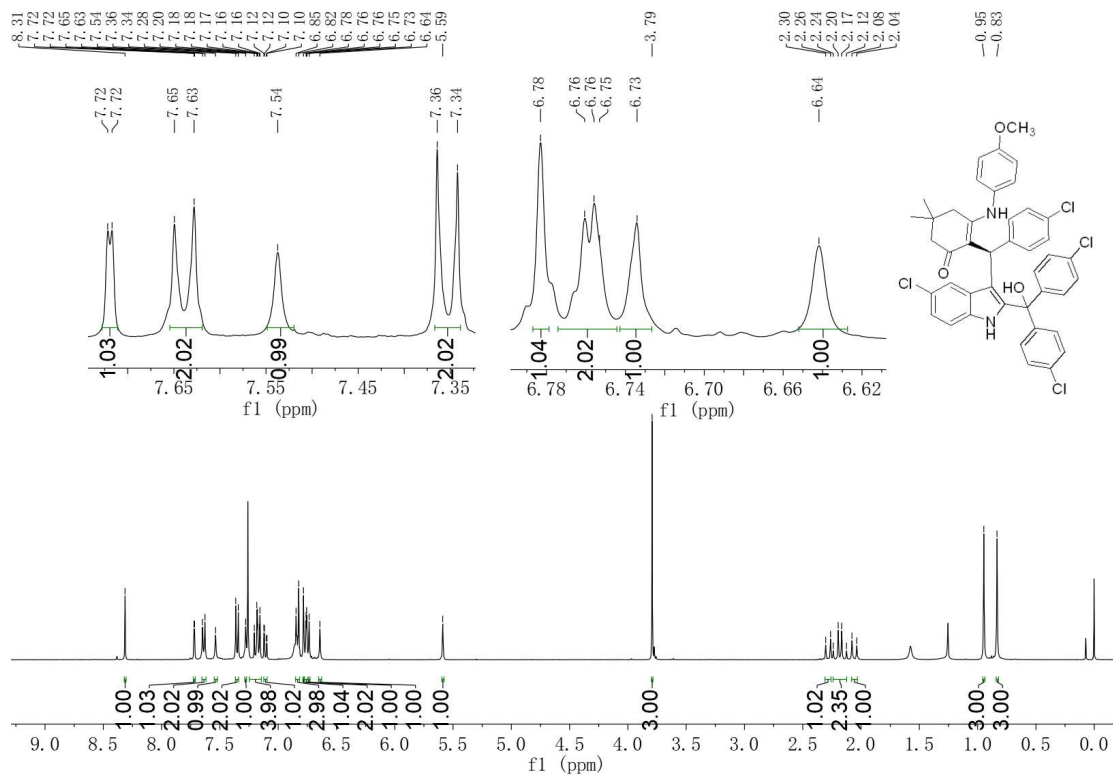

<sup>13</sup>C NMR (100 MHz, CDCl<sub>3</sub>) of compound **3ea**

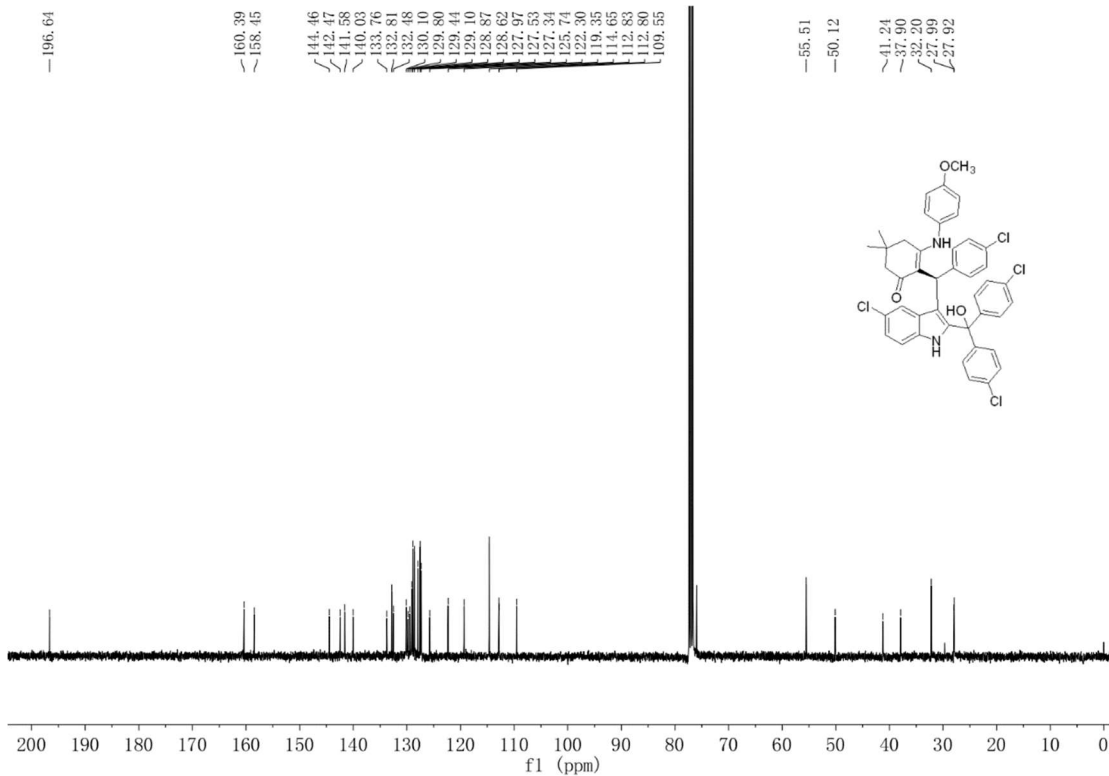



$^1\text{H}$  NMR (400 MHz,  $\text{CDCl}_3$ ) of compound **3fa**

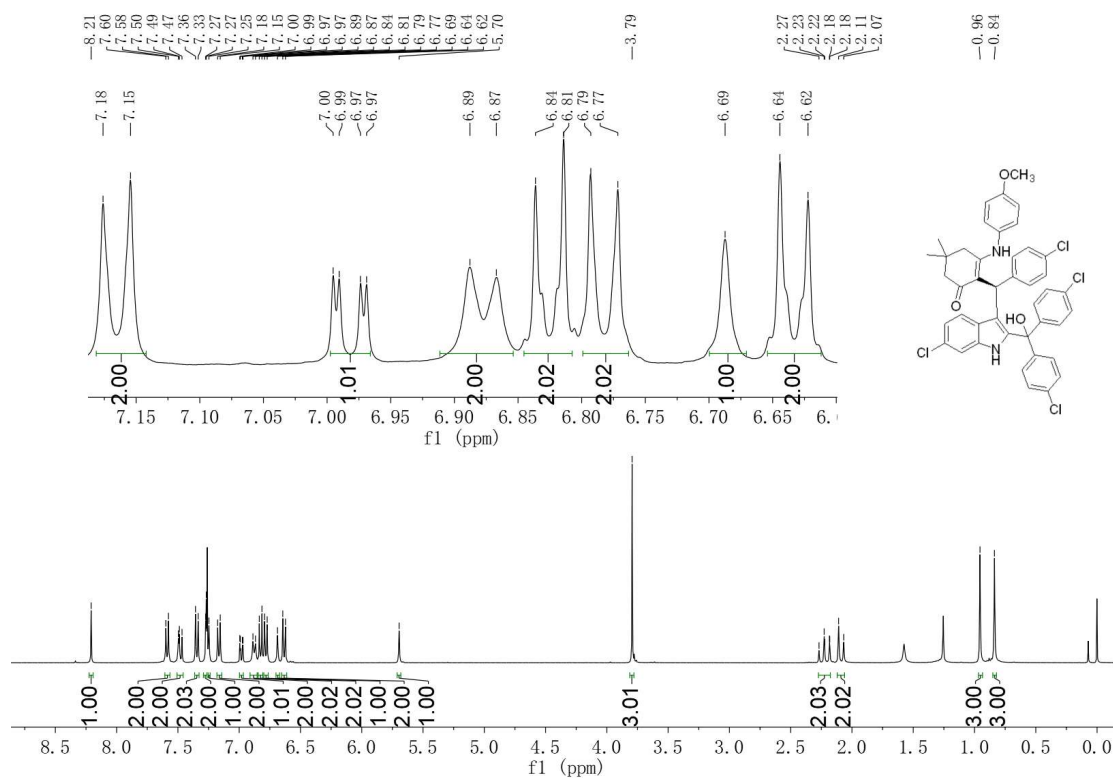

$^{13}\text{C}$  NMR (100 MHz,  $\text{CDCl}_3$ ) of compound **3fa**

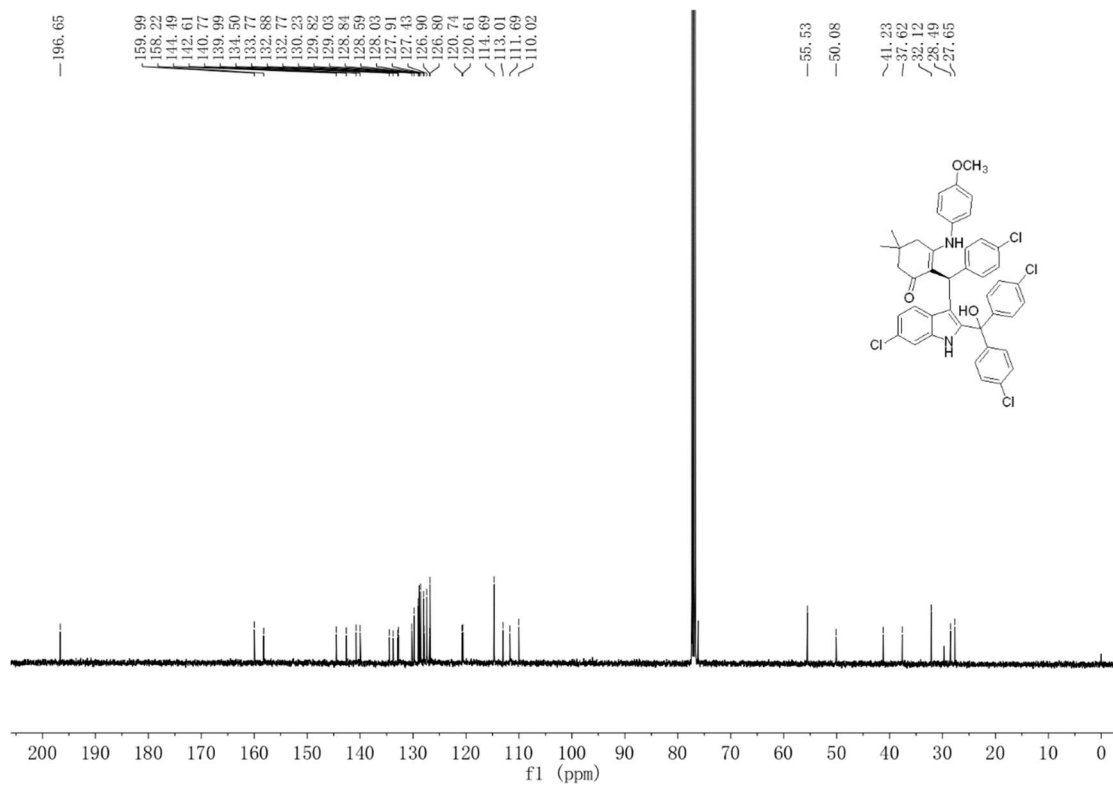

$^1\text{H}$  NMR (400 MHz,  $\text{CDCl}_3$ ) of compound **3di**

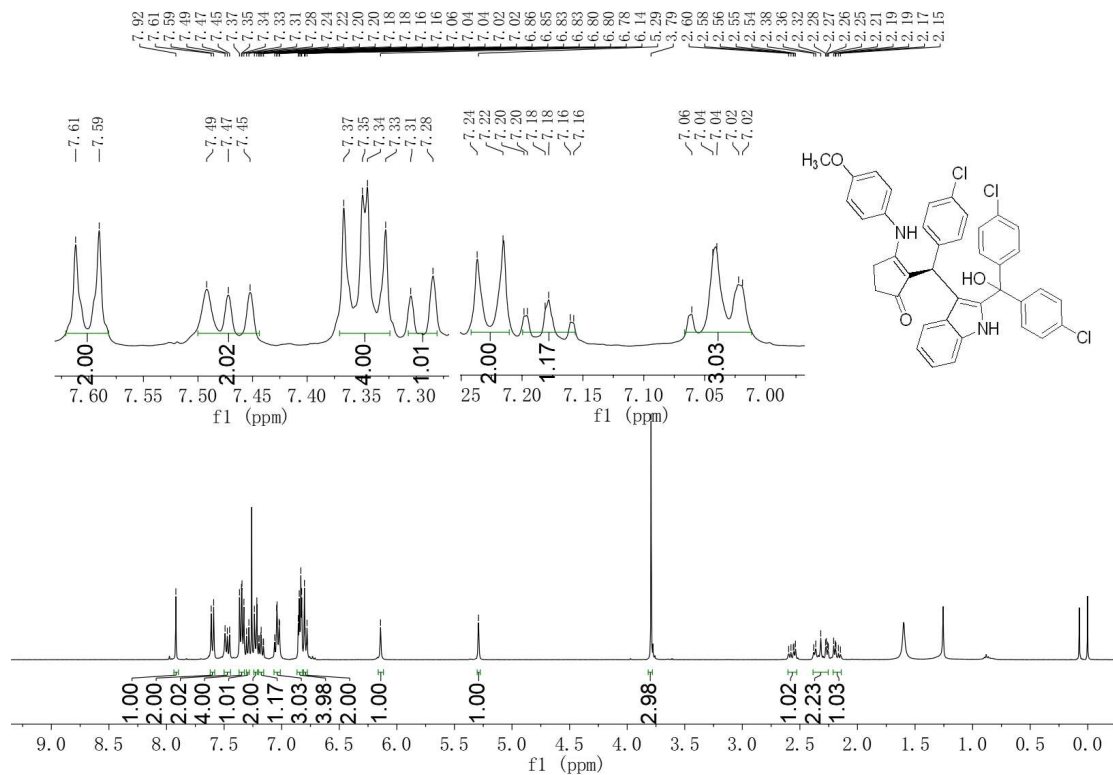

$^{13}\text{C}$  NMR (100 MHz,  $\text{CDCl}_3$ ) of compound **3di**

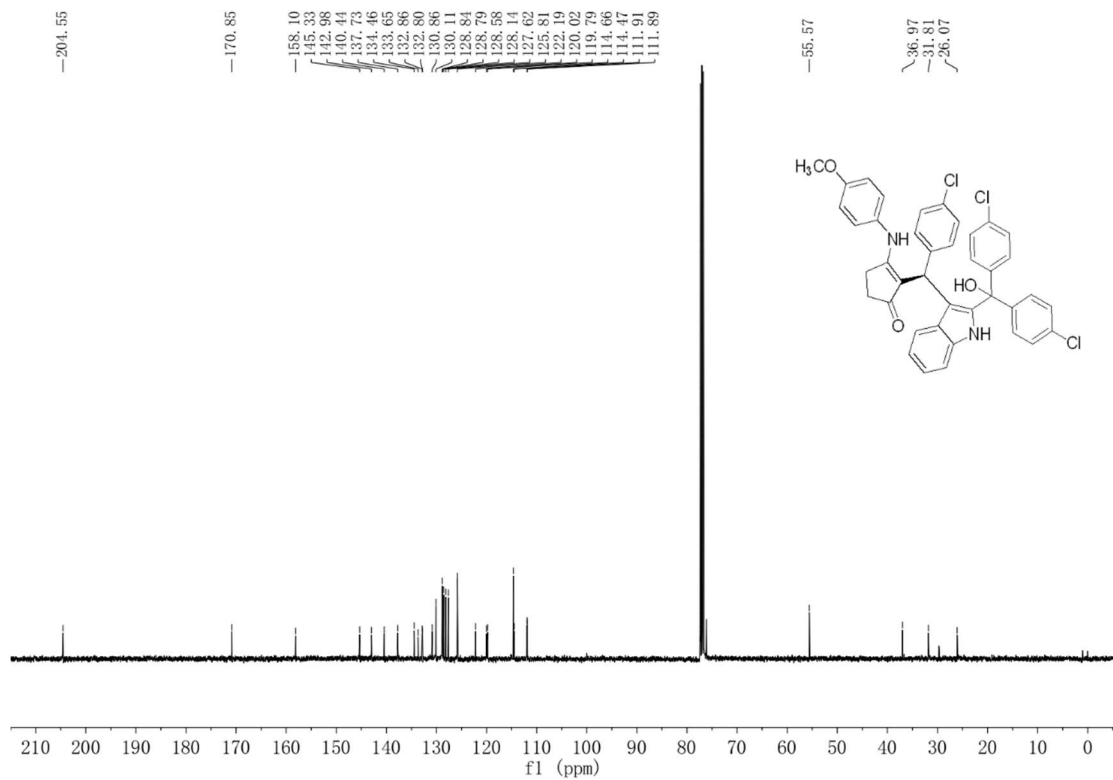

$^1\text{H}$  NMR (400 MHz,  $\text{CDCl}_3$ ) of compound **3aj**

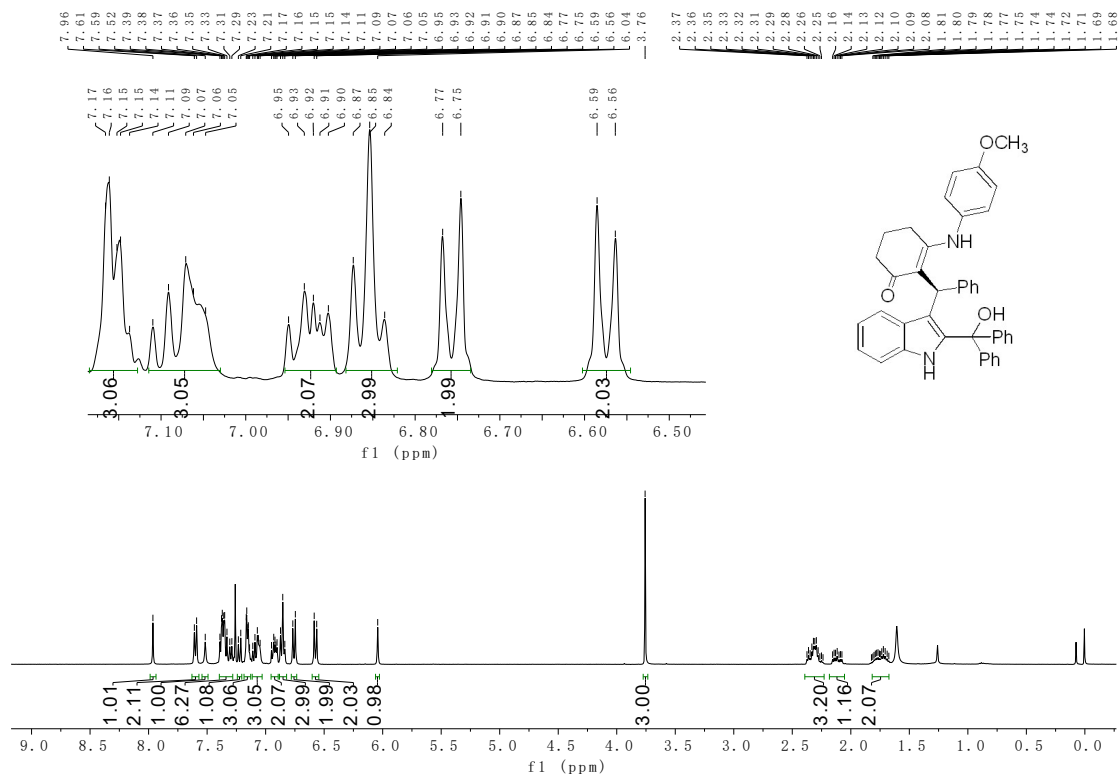

$^{13}\text{C}$  NMR (100 MHz,  $\text{CDCl}_3$ ) of compound **3aj**

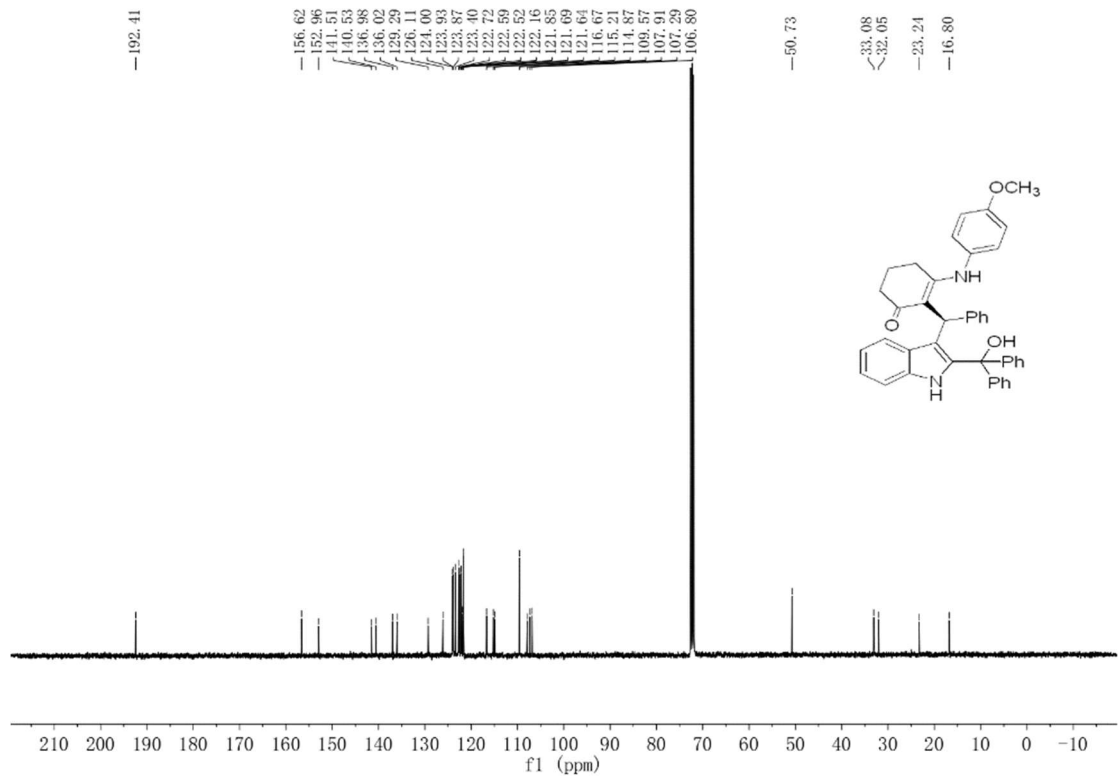

$^1\text{H}$  NMR (400 MHz,  $\text{CDCl}_3$ ) of compound **3ak**

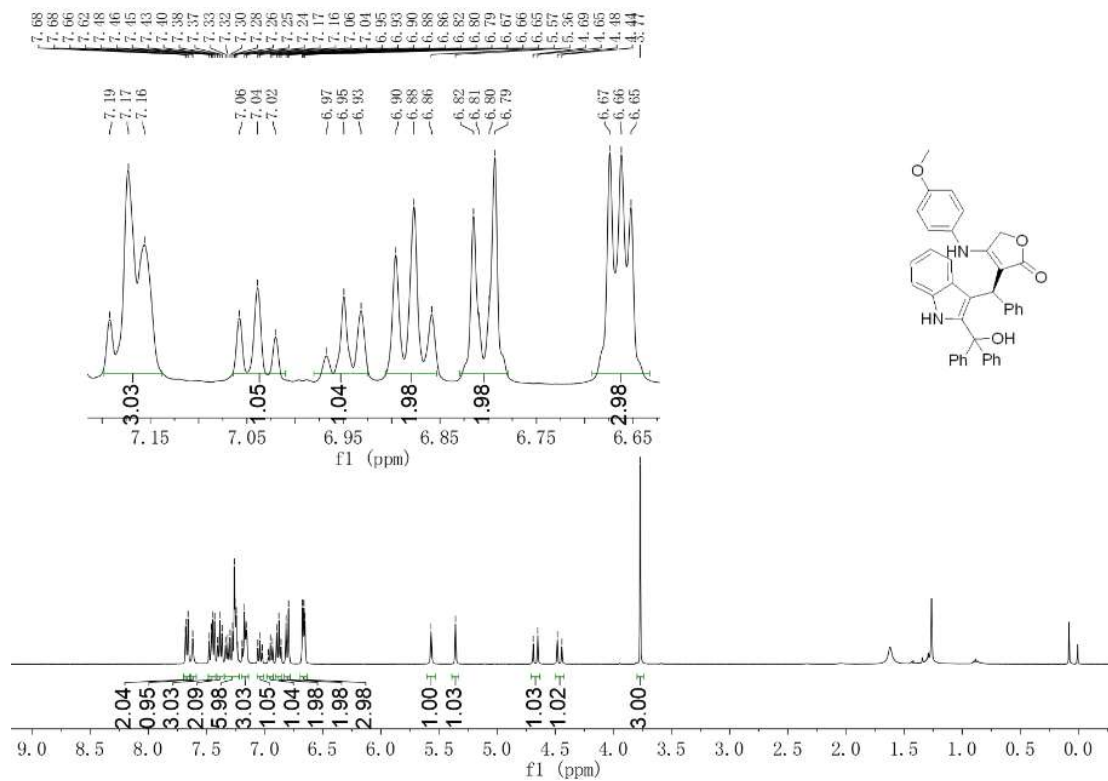

$^{13}\text{C}$  NMR (100 MHz,  $\text{CDCl}_3$ ) of compound **3ak**

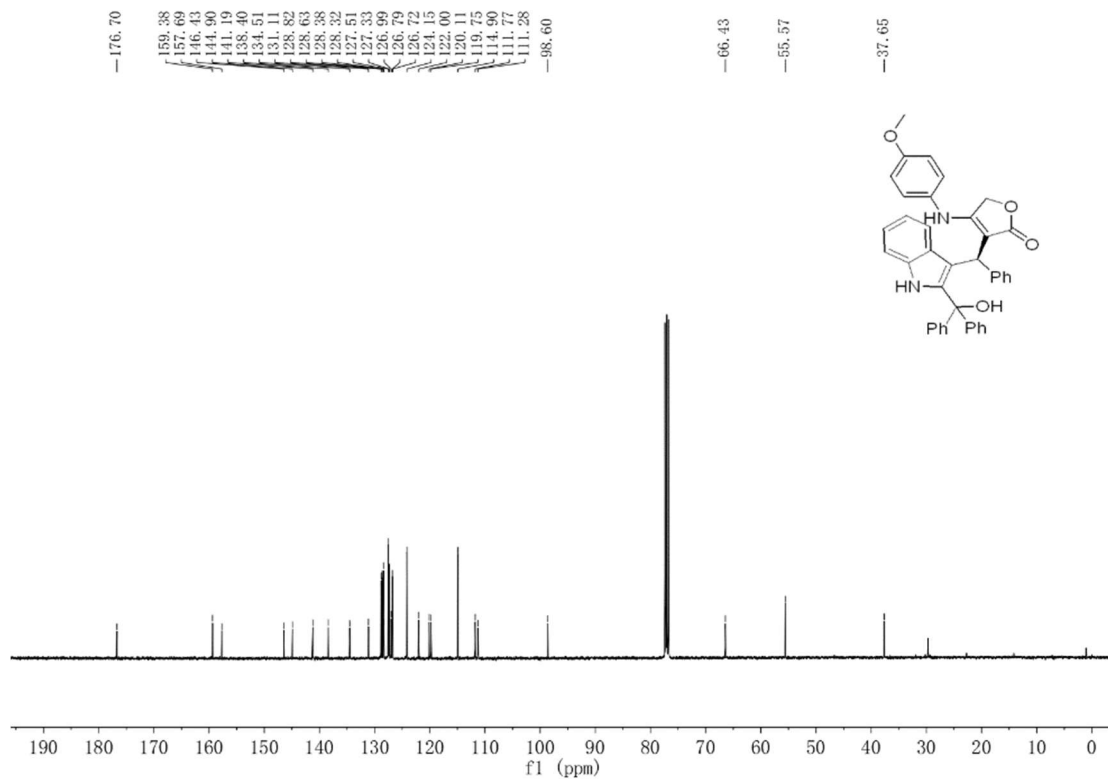

<sup>1</sup>H NMR (400 MHz, CDCl<sub>3</sub>) of compound **3ha**

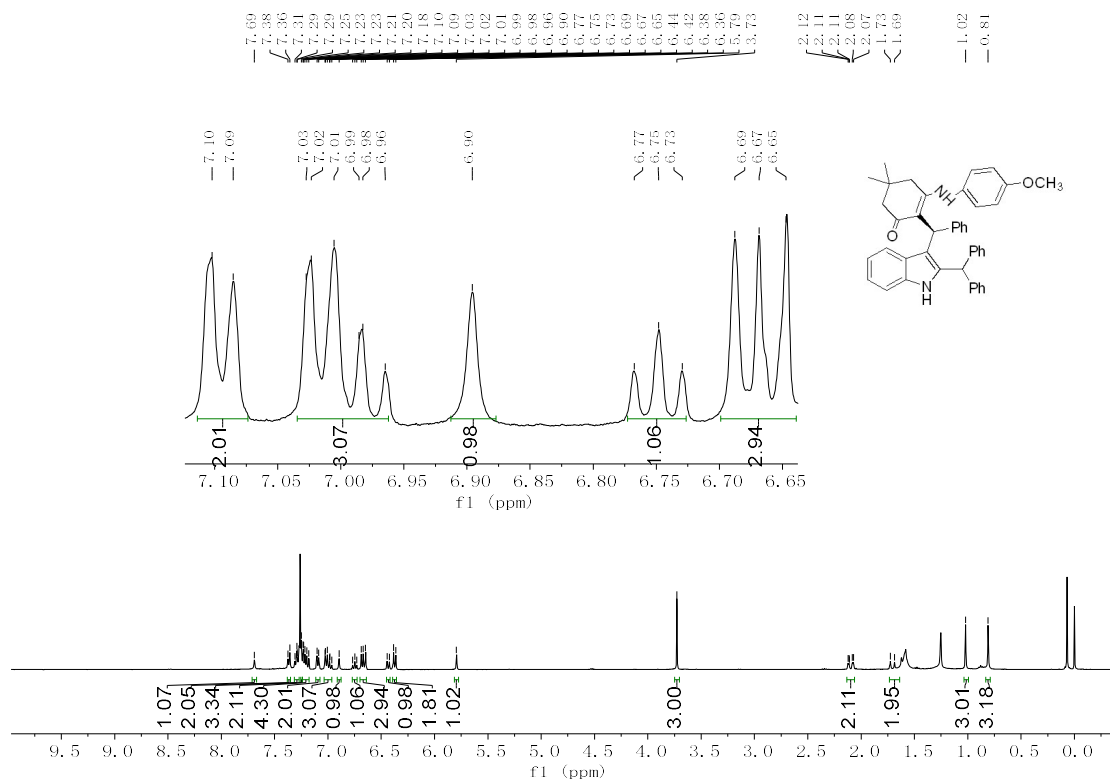

<sup>1</sup>H NMR (400 MHz, CDCl<sub>3</sub>) of compound **3ga**

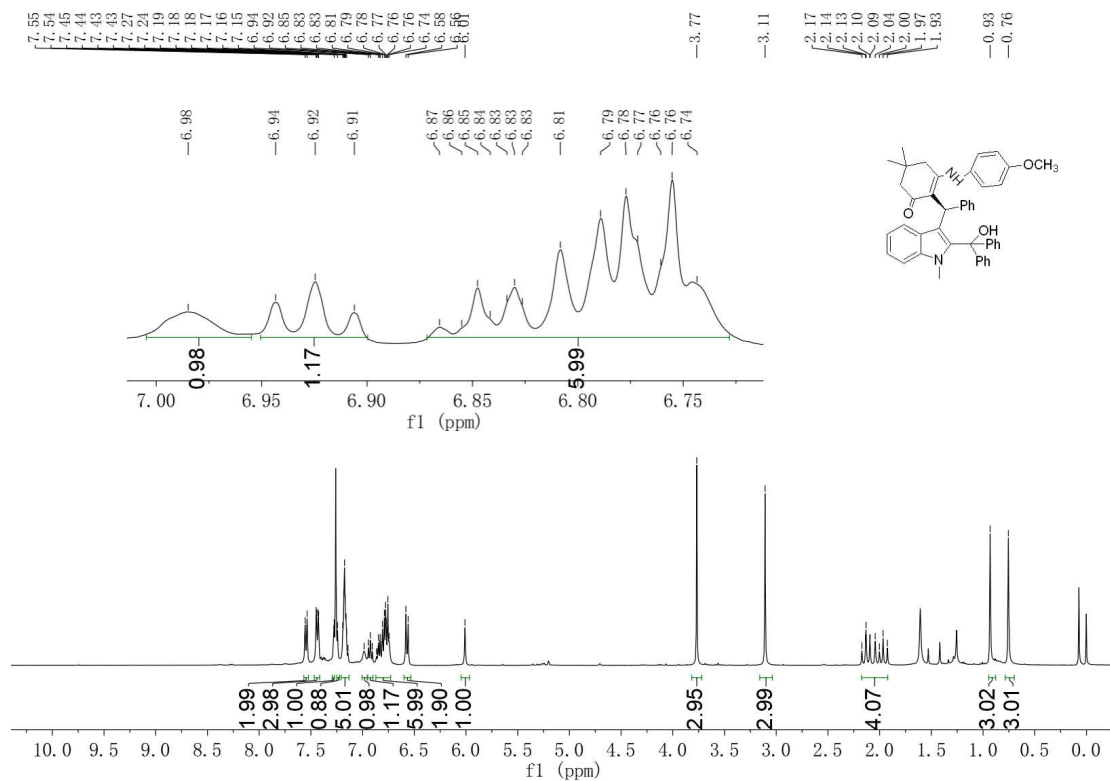

<sup>13</sup>C NMR (100 MHz, CDCl<sub>3</sub>) of compound **3ga**

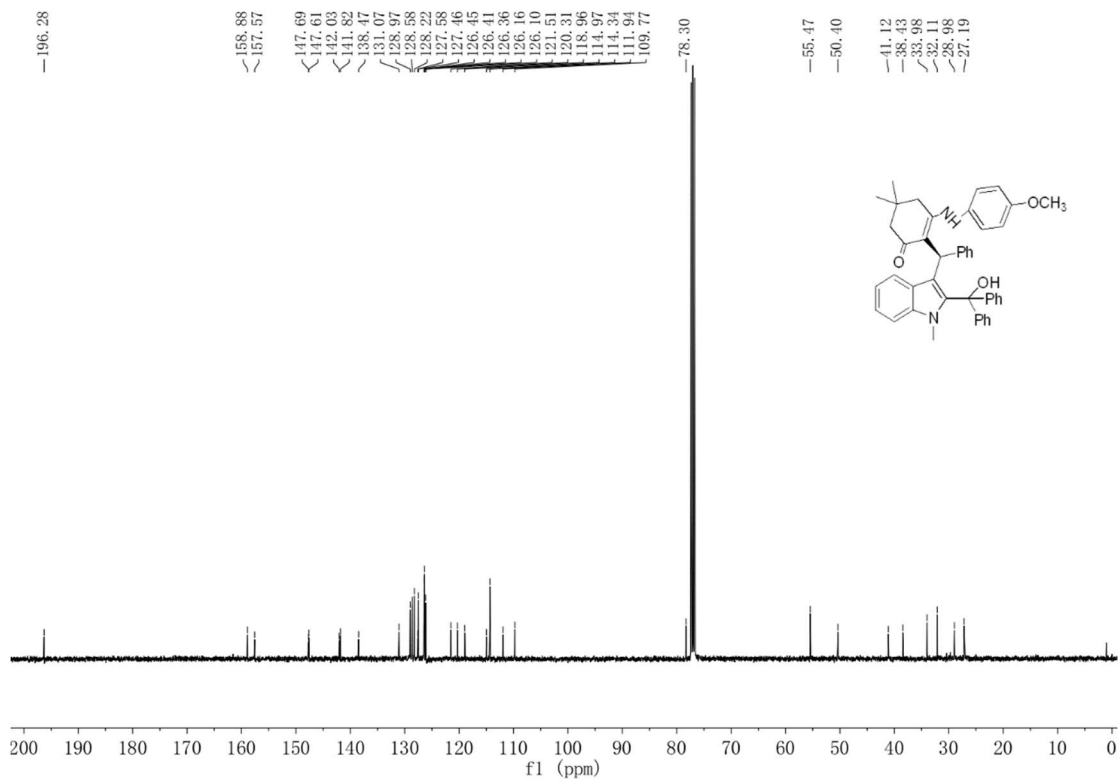

### 3. HPLC spectra of product 3

#### 3aa

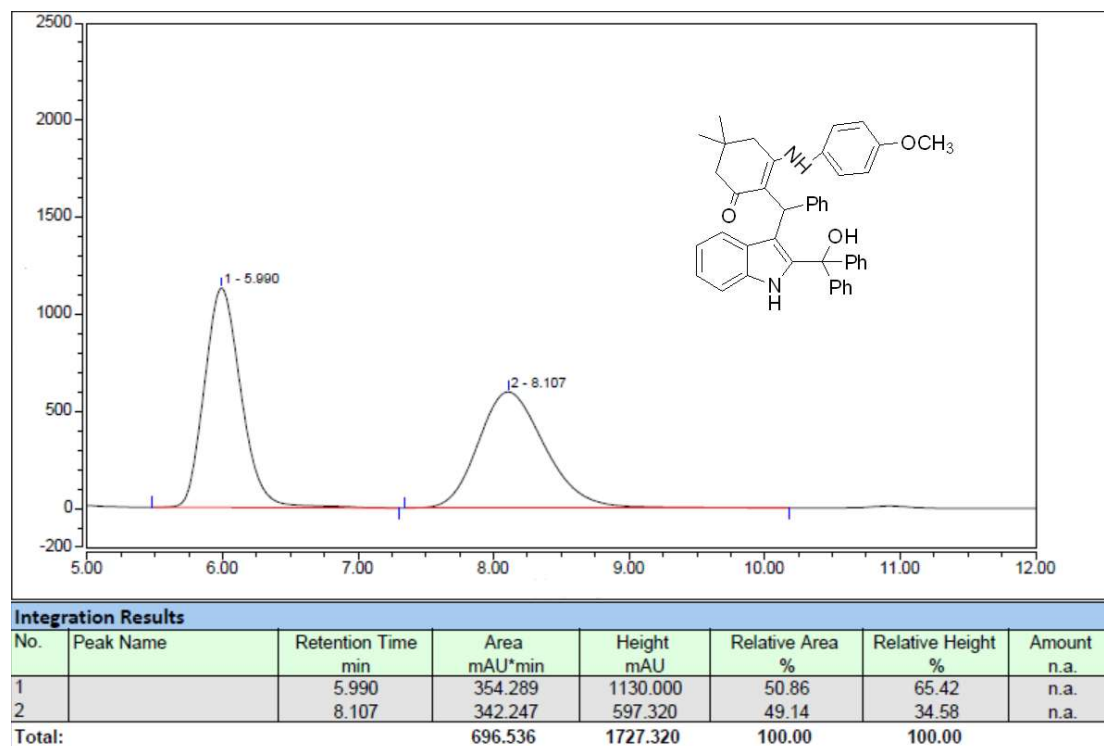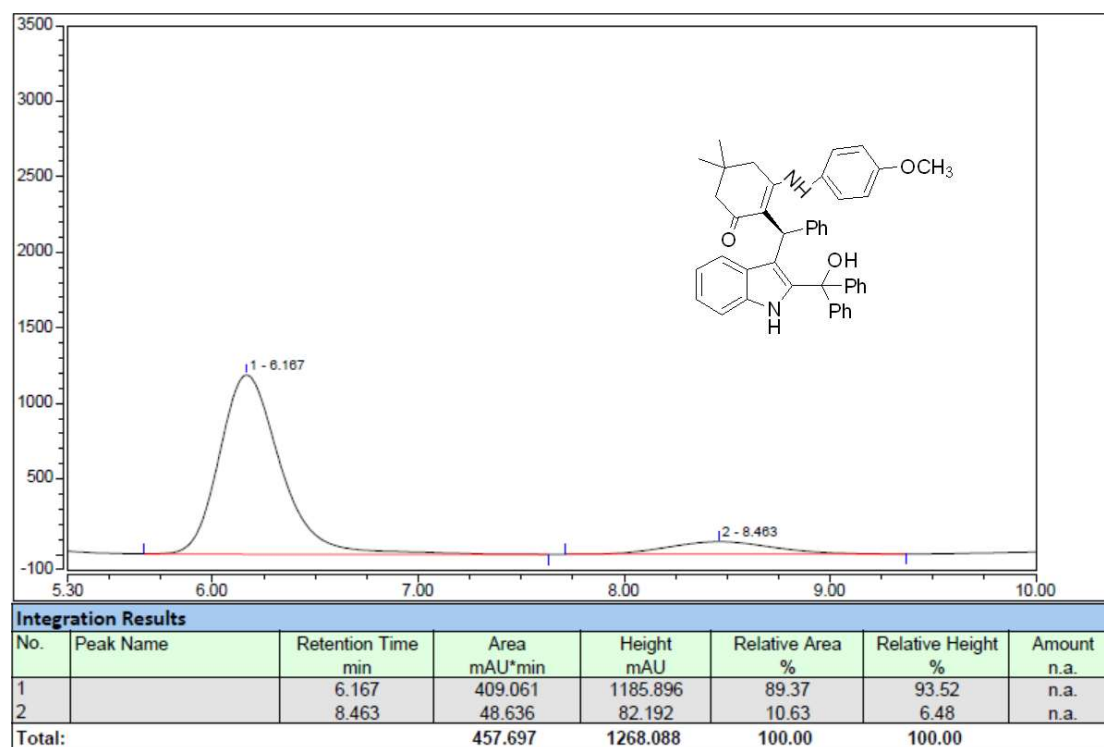

### 3ab

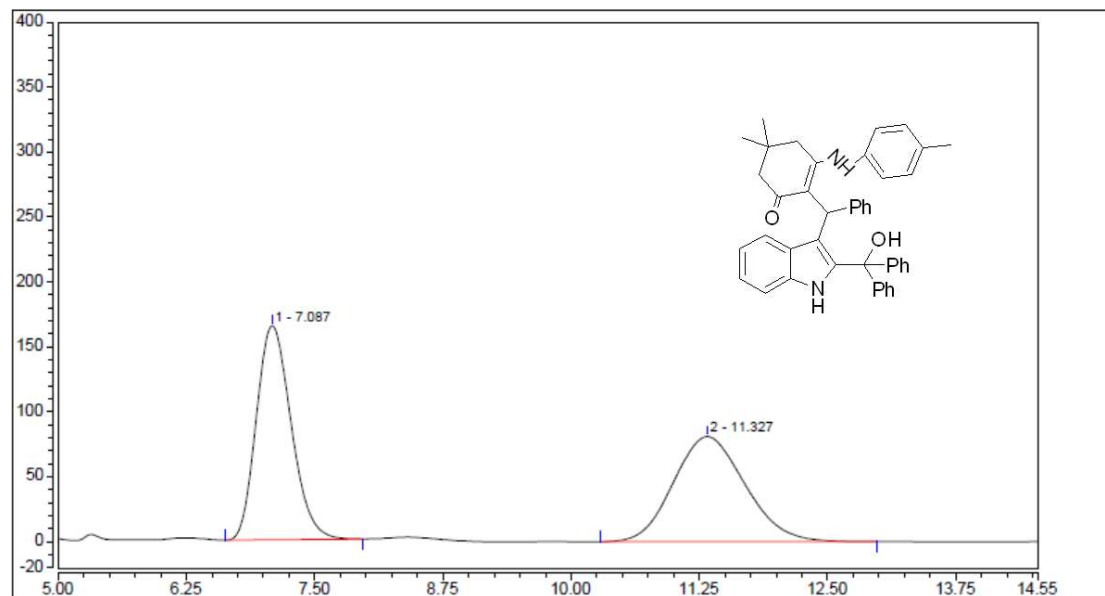

| Integration Results |           |                       |                 |               |                    |                      |                |
|---------------------|-----------|-----------------------|-----------------|---------------|--------------------|----------------------|----------------|
| No.                 | Peak Name | Retention Time<br>min | Area<br>mAU*min | Height<br>mAU | Relative Area<br>% | Relative Height<br>% | Amount<br>n.a. |
| 1                   |           | 7.087                 | 64.902          | 164.730       | 49.92              | 67.10                | n.a.           |
| 2                   |           | 11.327                | 65.118          | 80.782        | 50.08              | 32.90                | n.a.           |
| Total:              |           |                       | 130.019         | 245.512       | 100.00             | 100.00               |                |

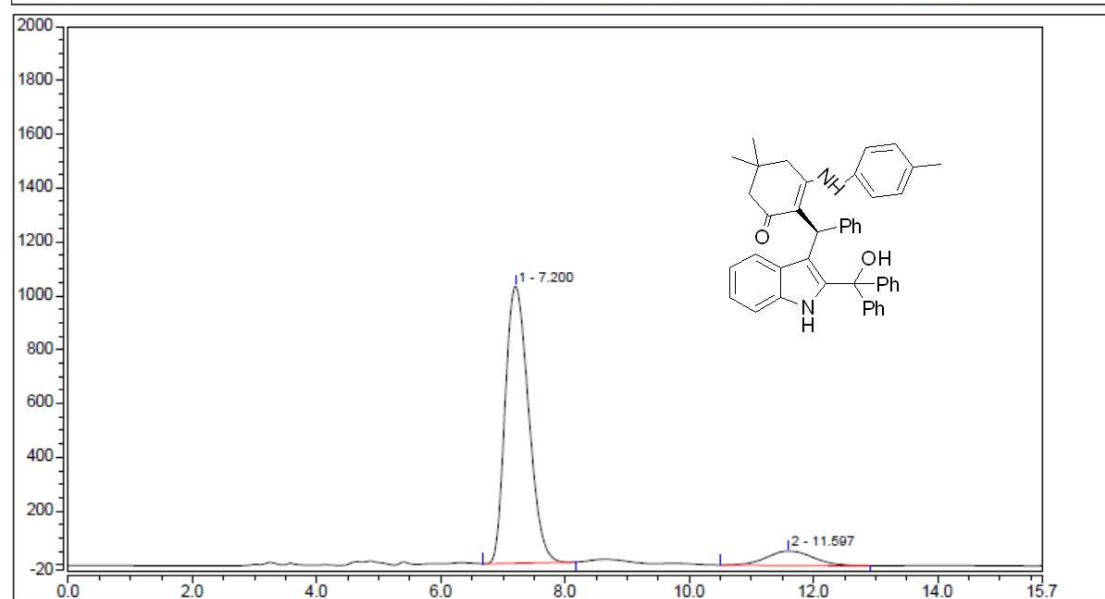

| Integration Results |           |                       |                 |               |                    |                      |                |
|---------------------|-----------|-----------------------|-----------------|---------------|--------------------|----------------------|----------------|
| No.                 | Peak Name | Retention Time<br>min | Area<br>mAU*min | Height<br>mAU | Relative Area<br>% | Relative Height<br>% | Amount<br>n.a. |
| 1                   |           | 7.200                 | 446.954         | 1028.282      | 90.69              | 95.08                | n.a.           |
| 2                   |           | 11.597                | 45.882          | 53.197        | 9.31               | 4.92                 | n.a.           |
| Total:              |           |                       | 492.836         | 1081.479      | 100.00             | 100.00               |                |



### 3ac

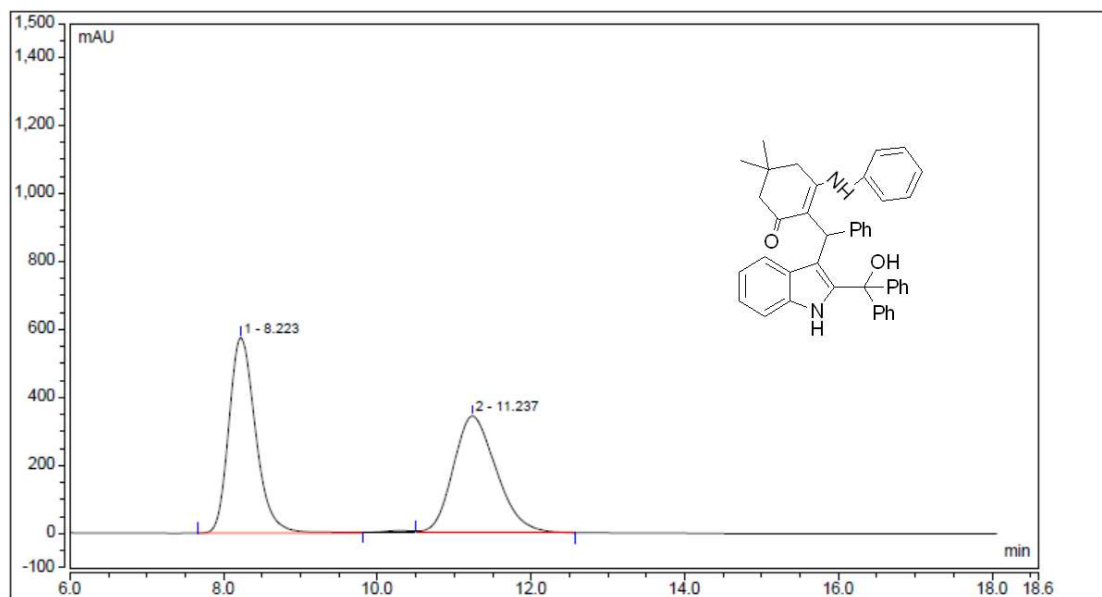

| Integration Results |           |                    |              |            |                 |                   |             |
|---------------------|-----------|--------------------|--------------|------------|-----------------|-------------------|-------------|
| No.                 | Peak Name | Retention Time min | Area mAU*min | Height mAU | Relative Area % | Relative Height % | Amount n.a. |
| 1                   |           | 8.223              | 232.392      | 574.944    | 50.92           | 62.61             | n.a.        |
| 2                   |           | 11.237             | 223.976      | 343.401    | 49.08           | 37.39             | n.a.        |
| Total:              |           |                    | 456.368      | 918.345    | 100.00          | 100.00            |             |

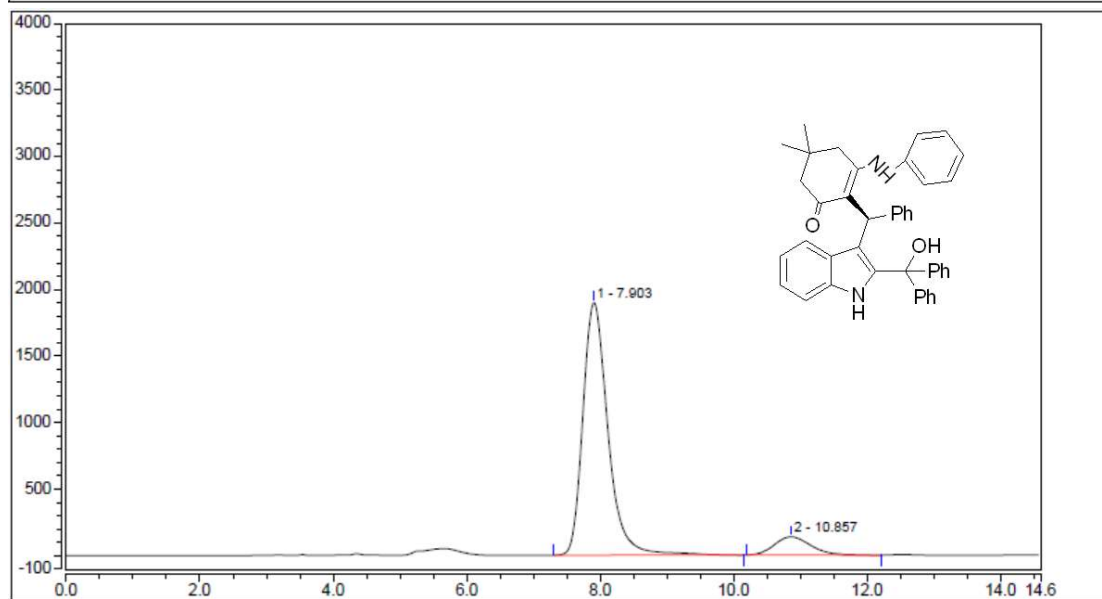

| Integration Results |           |                    |              |            |                 |                   |             |
|---------------------|-----------|--------------------|--------------|------------|-----------------|-------------------|-------------|
| No.                 | Peak Name | Retention Time min | Area mAU*min | Height mAU | Relative Area % | Relative Height % | Amount n.a. |
| 1                   |           | 7.903              | 826.587      | 1899.577   | 90.56           | 93.28             | n.a.        |
| 2                   |           | 10.857             | 86.153       | 136.762    | 9.44            | 6.72              | n.a.        |
| Total:              |           |                    | 912.740      | 2036.339   | 100.00          | 100.00            |             |

### 3ad

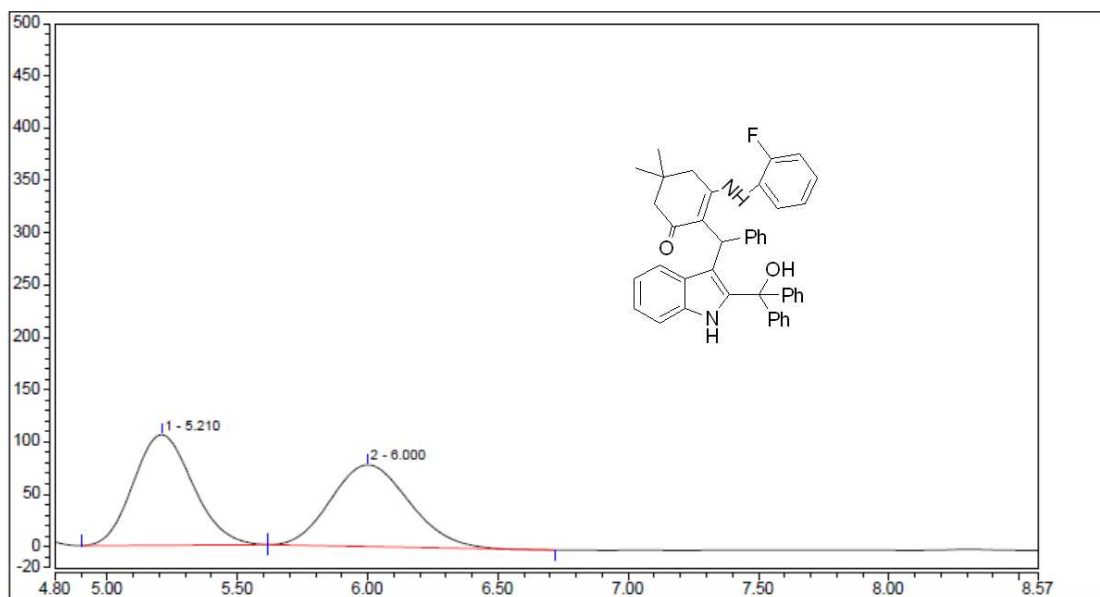

| Integration Results |           |                    |              |            |                 |                   |        |
|---------------------|-----------|--------------------|--------------|------------|-----------------|-------------------|--------|
| No.                 | Peak Name | Retention Time min | Area mAU*min | Height mAU | Relative Area % | Relative Height % | Amount |
| 1                   |           | 5.210              | 27.946       | 105.528    | 50.64           | 57.51             | n.a.   |
| 2                   |           | 6.000              | 27.241       | 77.958     | 49.36           | 42.49             | n.a.   |
| Total:              |           |                    | 55.187       | 183.486    | 100.00          | 100.00            |        |

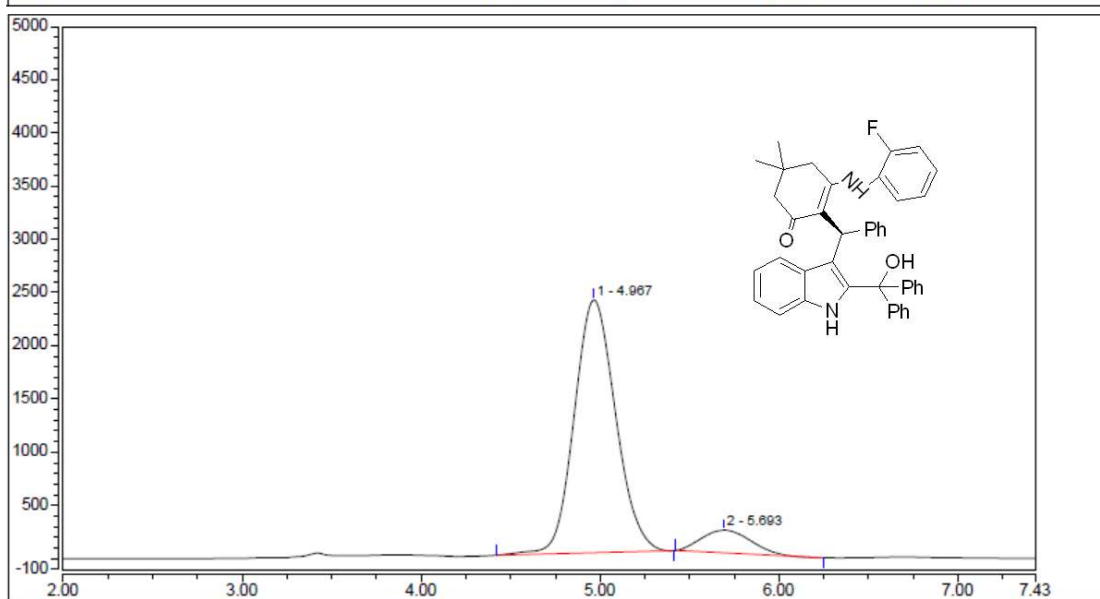

| Integration Results |           |                    |              |            |                 |                   |        |
|---------------------|-----------|--------------------|--------------|------------|-----------------|-------------------|--------|
| No.                 | Peak Name | Retention Time min | Area mAU*min | Height mAU | Relative Area % | Relative Height % | Amount |
| 1                   |           | 4.967              | 634.891      | 2375.743   | 90.36           | 91.78             | n.a.   |
| 2                   |           | 5.693              | 67.752       | 212.907    | 9.64            | 8.22              | n.a.   |
| Total:              |           |                    | 702.643      | 2588.650   | 100.00          | 100.00            |        |

### 3ae

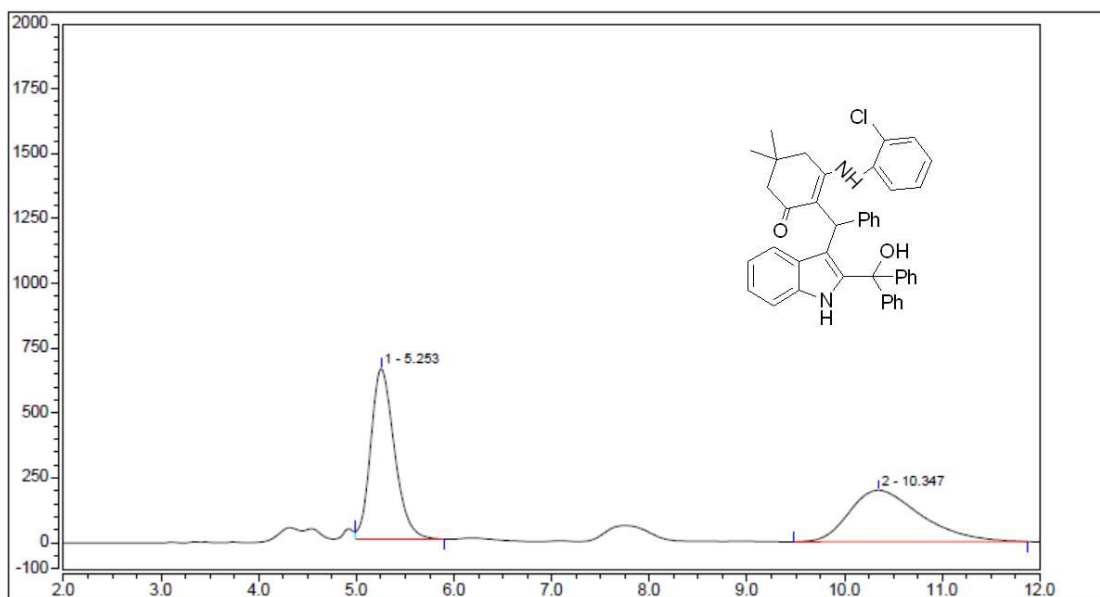

| Integration Results |           |                    |              |            |                 |                   |             |
|---------------------|-----------|--------------------|--------------|------------|-----------------|-------------------|-------------|
| No.                 | Peak Name | Retention Time min | Area mAU*min | Height mAU | Relative Area % | Relative Height % | Amount n.a. |
| 1                   |           | 5.253              | 185.692      | 657.080    | 52.46           | 76.85             | n.a.        |
| 2                   |           | 10.347             | 168.308      | 197.911    | 47.54           | 23.15             | n.a.        |
| Total:              |           |                    | 354.000      | 854.991    | 100.00          | 100.00            |             |

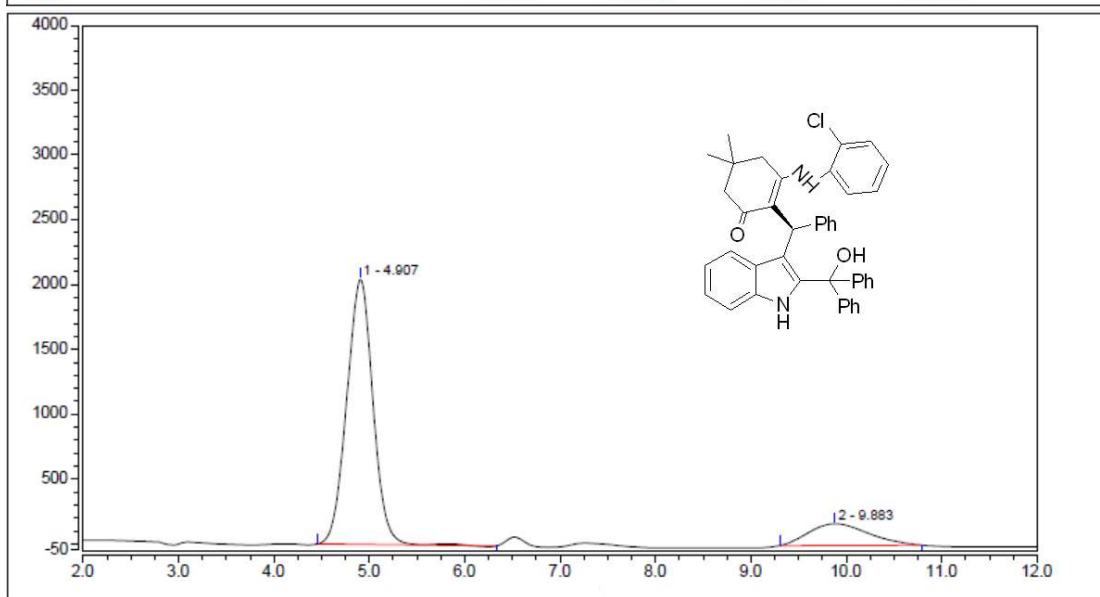

| Integration Results |           |                    |              |            |                 |                   |             |
|---------------------|-----------|--------------------|--------------|------------|-----------------|-------------------|-------------|
| No.                 | Peak Name | Retention Time min | Area mAU*min | Height mAU | Relative Area % | Relative Height % | Amount n.a. |
| 1                   |           | 4.907              | 652.552      | 2045.496   | 84.32           | 92.45             | n.a.        |
| 2                   |           | 9.883              | 121.317      | 166.945    | 15.68           | 7.55              | n.a.        |
| Total:              |           |                    | 773.869      | 2212.441   | 100.00          | 100.00            |             |

### 3af

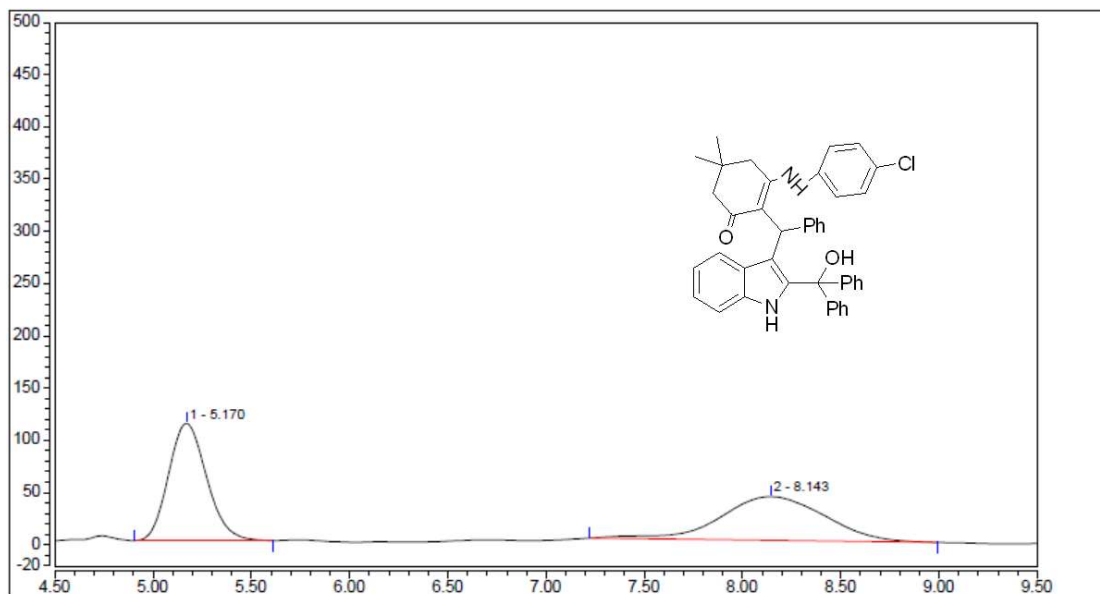

| Integration Results |           |                    |              |            |                 |                   |        |
|---------------------|-----------|--------------------|--------------|------------|-----------------|-------------------|--------|
| No.                 | Peak Name | Retention Time min | Area mAU*min | Height mAU | Relative Area % | Relative Height % | Amount |
| 1                   |           | 5.170              | 25.190       | 112.211    | 49.45           | 72.85             | n.a.   |
| 2                   |           | 8.143              | 25.746       | 41.814     | 50.55           | 27.15             | n.a.   |
| Total:              |           |                    | 50.936       | 154.025    | 100.00          | 100.00            |        |

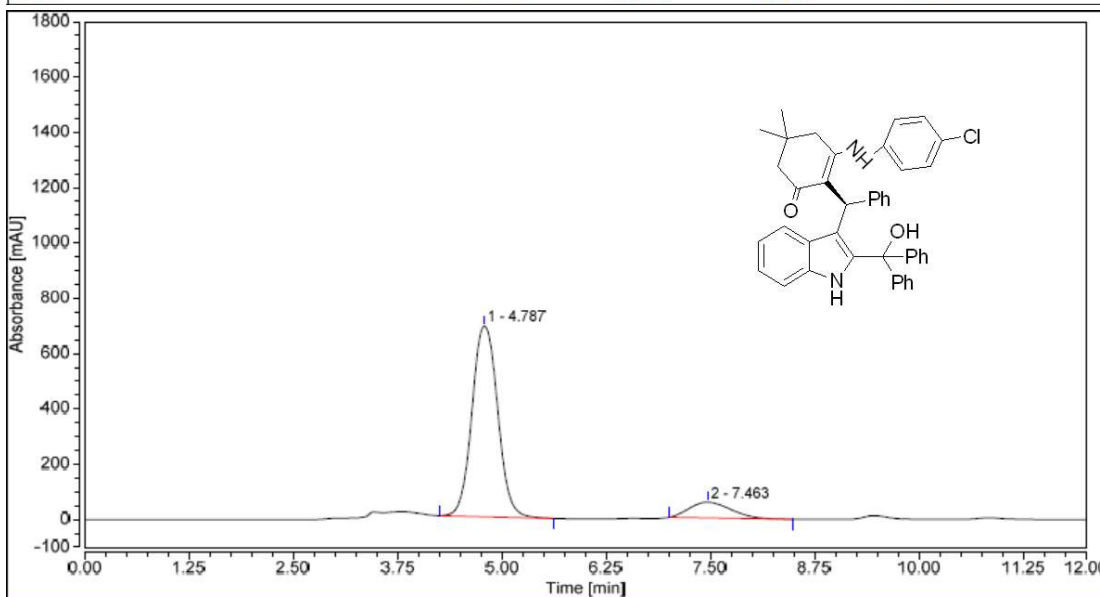

| Integration Results |           |                    |              |            |                 |                   |        |
|---------------------|-----------|--------------------|--------------|------------|-----------------|-------------------|--------|
| No.                 | Peak Name | Retention Time min | Area mAU*min | Height mAU | Relative Area % | Relative Height % | Amount |
| 1                   |           | 4.787              | 246.712      | 689.249    | 88.26           | 92.35             | n.a.   |
| 2                   |           | 7.463              | 32.820       | 57.080     | 11.74           | 7.65              | n.a.   |
| Total:              |           |                    | 279.532      | 746.329    | 100.00          | 100.00            |        |

3ag

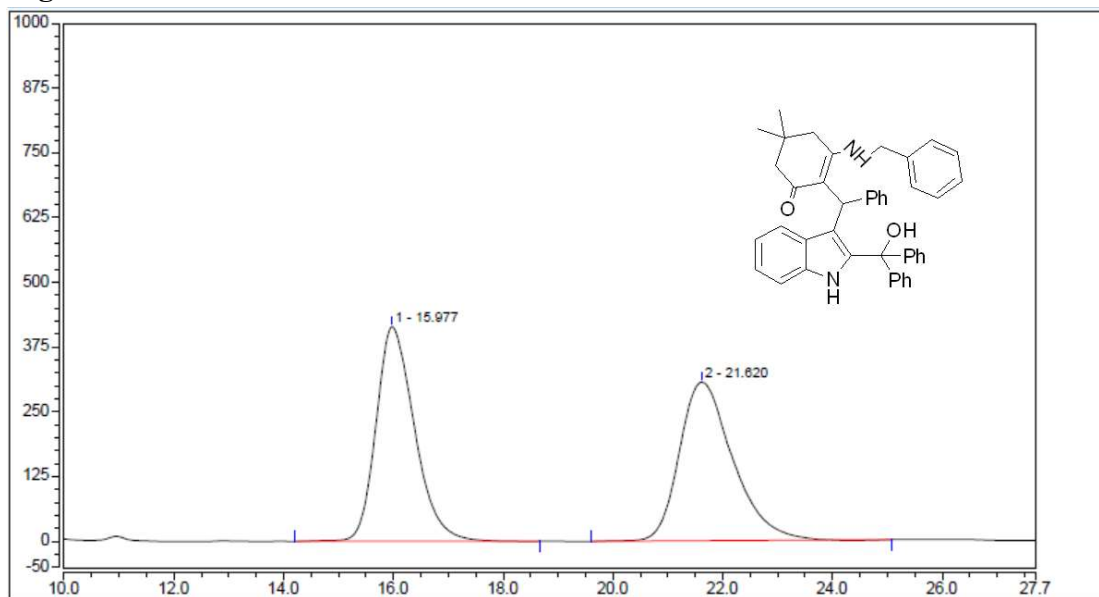

| Integration Results |           |                    |              |            |                 |                   |        |
|---------------------|-----------|--------------------|--------------|------------|-----------------|-------------------|--------|
| No.                 | Peak Name | Retention Time min | Area mAU*min | Height mAU | Relative Area % | Relative Height % | Amount |
| 1                   |           | 15.977             | 336.070      | 414.063    | 49.33           | 57.51             | n.a.   |
| 2                   |           | 21.620             | 345.218      | 305.899    | 50.67           | 42.49             | n.a.   |
| Total:              |           |                    | 681.288      | 719.962    | 100.00          | 100.00            |        |

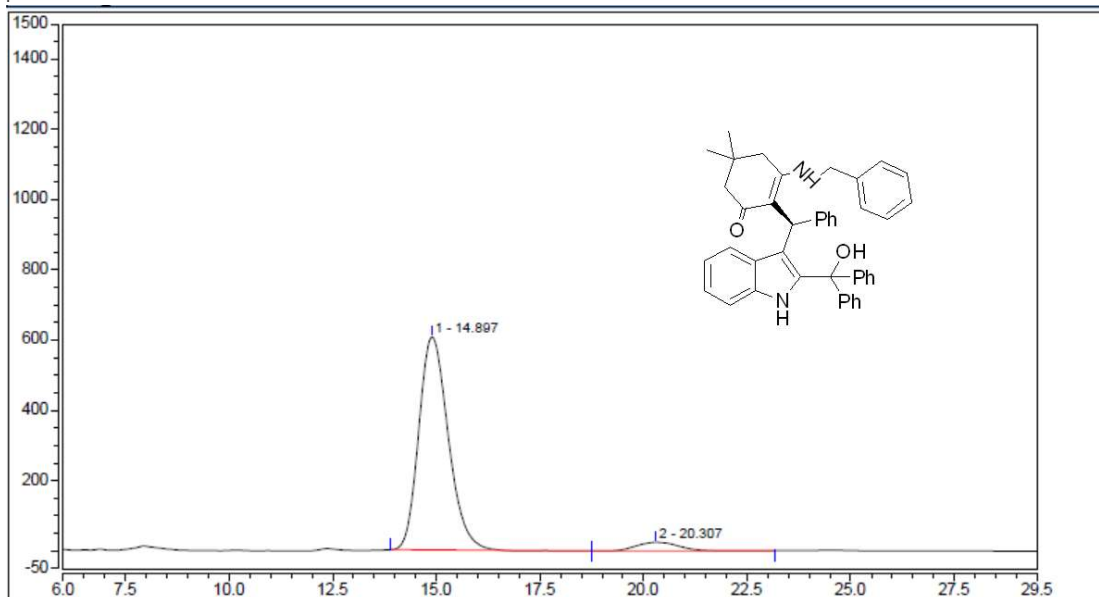

| Integration Results |           |                    |              |            |                 |                   |        |
|---------------------|-----------|--------------------|--------------|------------|-----------------|-------------------|--------|
| No.                 | Peak Name | Retention Time min | Area mAU*min | Height mAU | Relative Area % | Relative Height % | Amount |
| 1                   |           | 14.897             | 500.728      | 606.446    | 94.58           | 96.04             | n.a.   |
| 2                   |           | 20.307             | 28.706       | 25.011     | 5.42            | 3.96              | n.a.   |
| Total:              |           |                    | 529.434      | 631.458    | 100.00          | 100.00            |        |

### 3ba

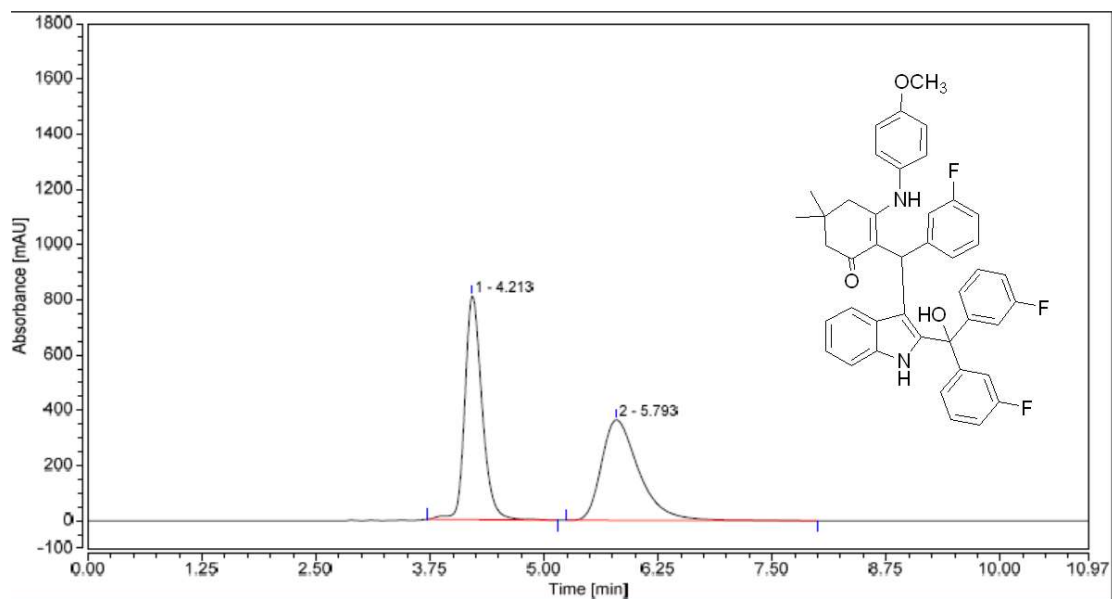

| Integration Results |           |                       |                 |               |                    |                      |        |
|---------------------|-----------|-----------------------|-----------------|---------------|--------------------|----------------------|--------|
| No.                 | Peak Name | Retention Time<br>min | Area<br>mAU*min | Height<br>mAU | Relative Area<br>% | Relative Height<br>% | Amount |
| 1                   |           | 4.213                 | 177.623         | 810.208       | 50.73              | 69.03                | n.a.   |
| 2                   |           | 5.793                 | 172.493         | 363.535       | 49.27              | 30.97                | n.a.   |
| Total:              |           |                       | 350.116         | 1173.743      | 100.00             | 100.00               |        |

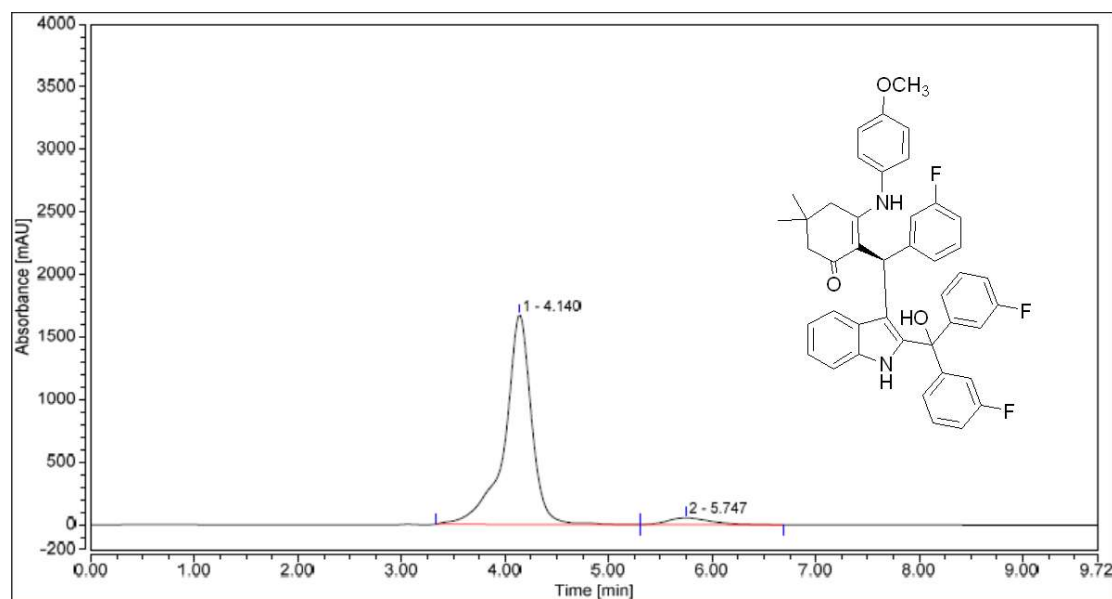

| Integration Results |           |                       |                 |               |                    |                      |        |
|---------------------|-----------|-----------------------|-----------------|---------------|--------------------|----------------------|--------|
| No.                 | Peak Name | Retention Time<br>min | Area<br>mAU*min | Height<br>mAU | Relative Area<br>% | Relative Height<br>% | Amount |
| 1                   |           | 4.140                 | 504.963         | 1674.379      | 95.20              | 96.89                | n.a.   |
| 2                   |           | 5.747                 | 25.437          | 53.672        | 4.80               | 3.11                 | n.a.   |
| Total:              |           |                       | 530.400         | 1728.051      | 100.00             | 100.00               |        |

### 3ca

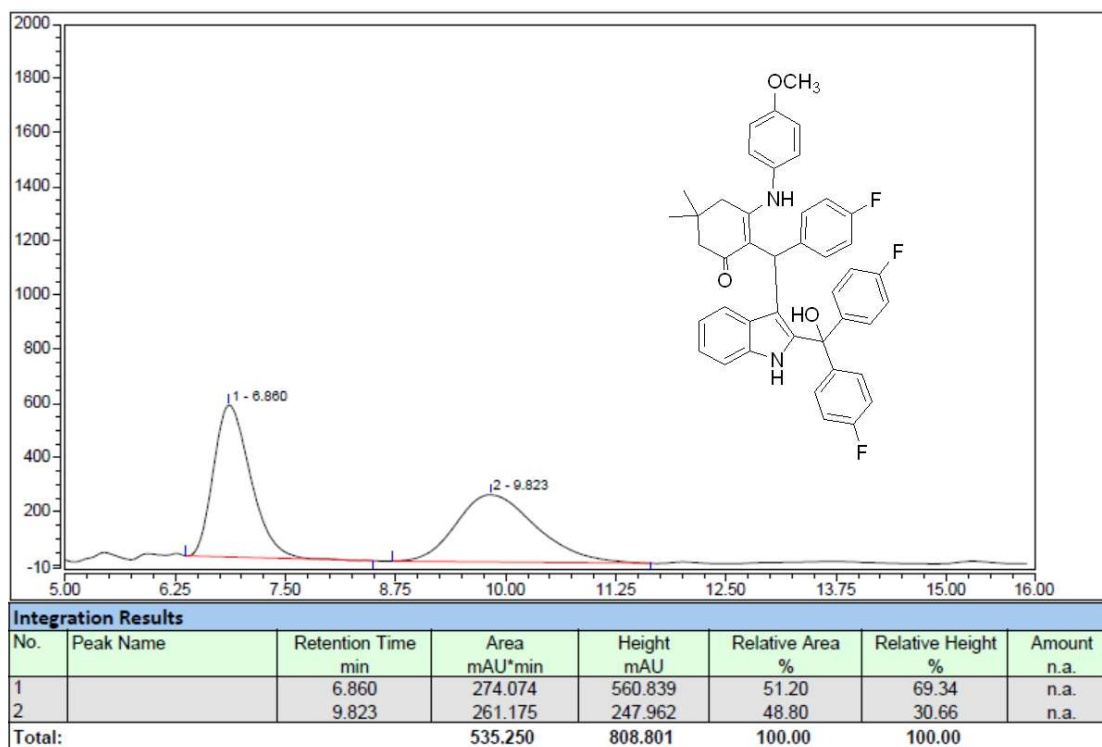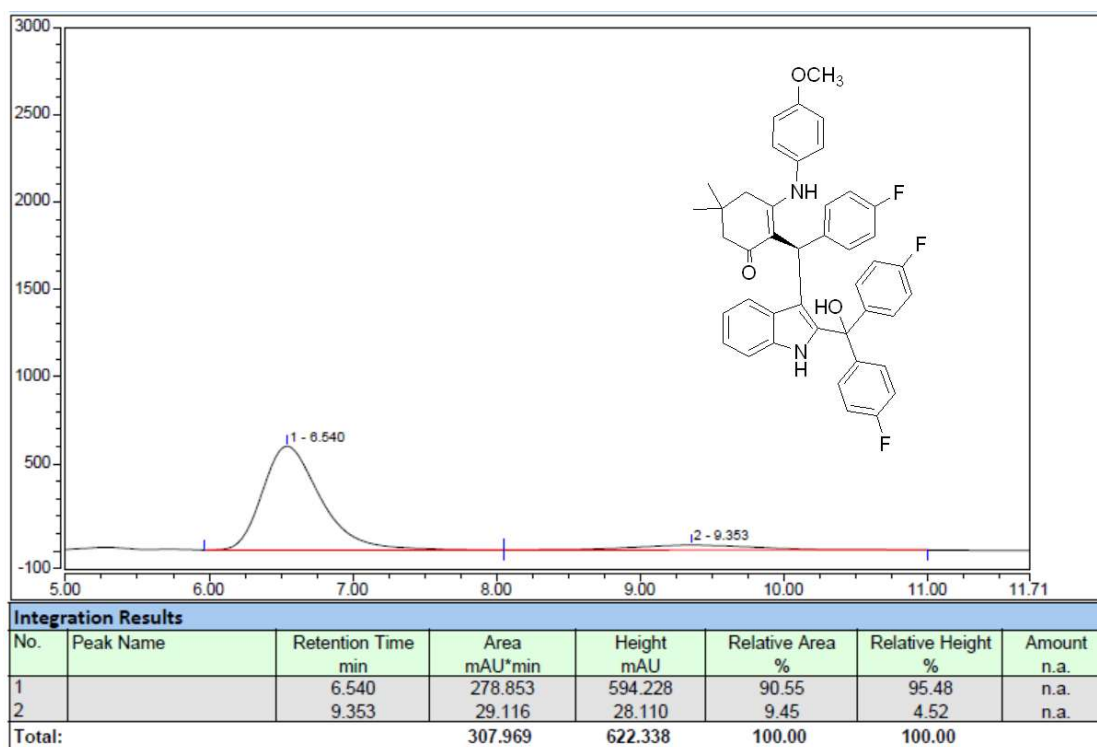



### 3da

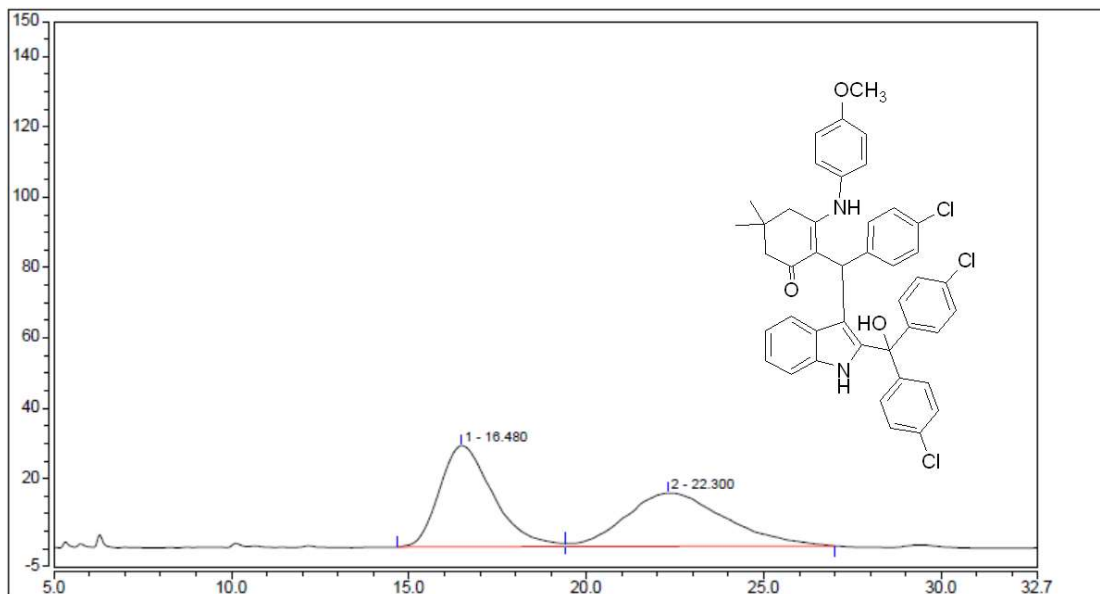

| Integration Results |           |                    |              |            |                 |                   |        |
|---------------------|-----------|--------------------|--------------|------------|-----------------|-------------------|--------|
| No.                 | Peak Name | Retention Time min | Area mAU*min | Height mAU | Relative Area % | Relative Height % | Amount |
| 1                   |           | 16.480             | 50.393       | 28.792     | 50.49           | 65.56             | n.a.   |
| 2                   |           | 22.300             | 49.405       | 15.126     | 49.51           | 34.44             | n.a.   |
| Total:              |           |                    | 99.798       | 43.918     | 100.00          | 100.00            |        |

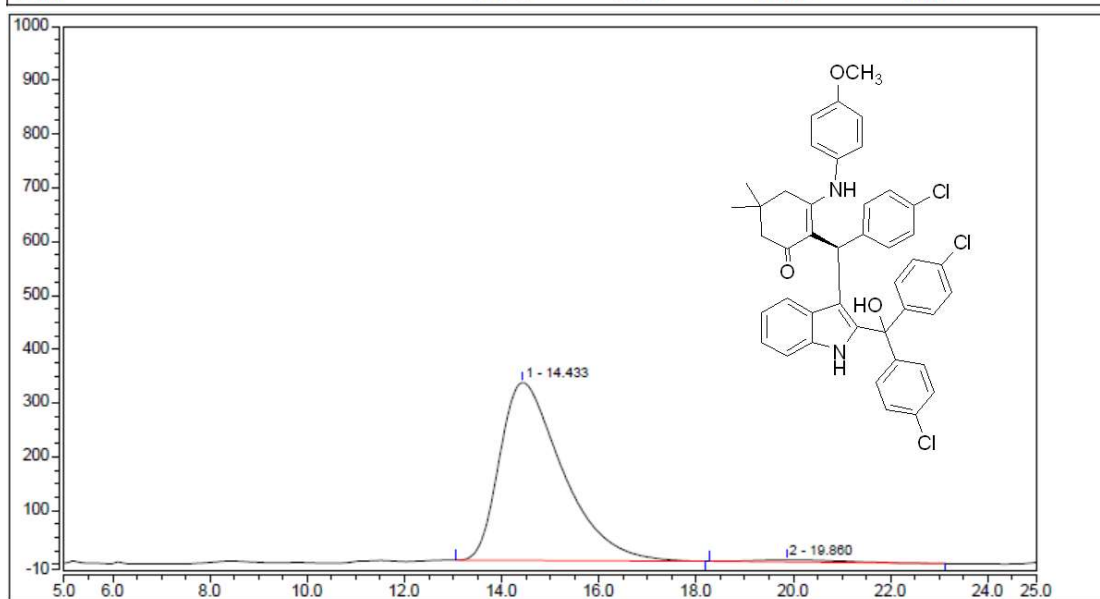

| Integration Results |           |                    |              |            |                 |                   |        |
|---------------------|-----------|--------------------|--------------|------------|-----------------|-------------------|--------|
| No.                 | Peak Name | Retention Time min | Area mAU*min | Height mAU | Relative Area % | Relative Height % | Amount |
| 1                   |           | 14.433             | 496.004      | 330.701    | 98.29           | 98.89             | n.a.   |
| 2                   |           | 19.860             | 8.630        | 3.697      | 1.71            | 1.11              | n.a.   |
| Total:              |           |                    | 504.634      | 334.398    | 100.00          | 100.00            |        |



3dh

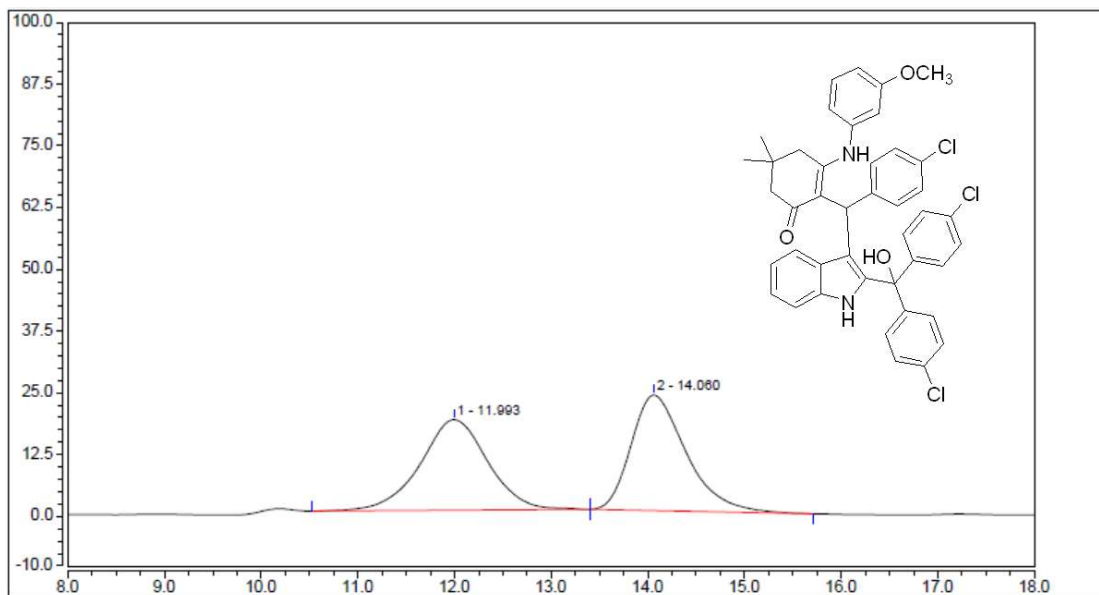

| Integration Results |           |                    |              |            |                 |                   |        |
|---------------------|-----------|--------------------|--------------|------------|-----------------|-------------------|--------|
| No.                 | Peak Name | Retention Time min | Area mAU*min | Height mAU | Relative Area % | Relative Height % | Amount |
| 1                   |           | 11.993             | 14.877       | 18.307     | 49.02           | 43.91             | n.a.   |
| 2                   |           | 14.060             | 15.473       | 23.385     | 50.98           | 56.09             | n.a.   |
| Total:              |           |                    | 30.350       | 41.692     | 100.00          | 100.00            |        |

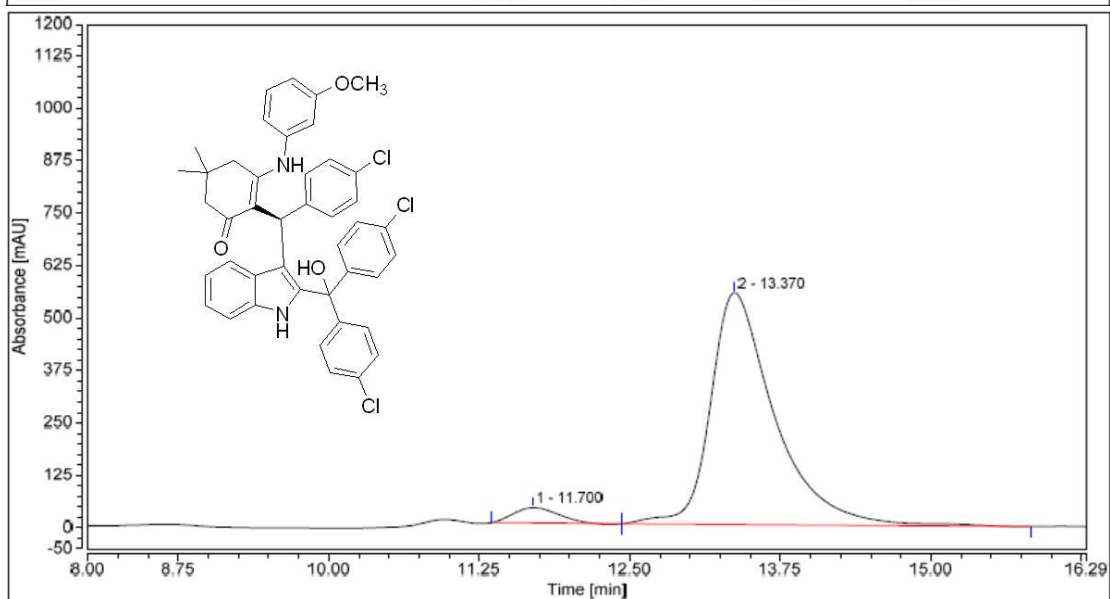

| Integration Results |           |                    |              |            |                 |                   |        |
|---------------------|-----------|--------------------|--------------|------------|-----------------|-------------------|--------|
| No.                 | Peak Name | Retention Time min | Area mAU*min | Height mAU | Relative Area % | Relative Height % | Amount |
| 1                   |           | 11.700             | 15.357       | 36.298     | 4.30            | 6.16              | n.a.   |
| 2                   |           | 13.370             | 341.959      | 552.495    | 95.70           | 93.84             | n.a.   |
| Total:              |           |                    | 357.316      | 588.793    | 100.00          | 100.00            |        |

### 3dc

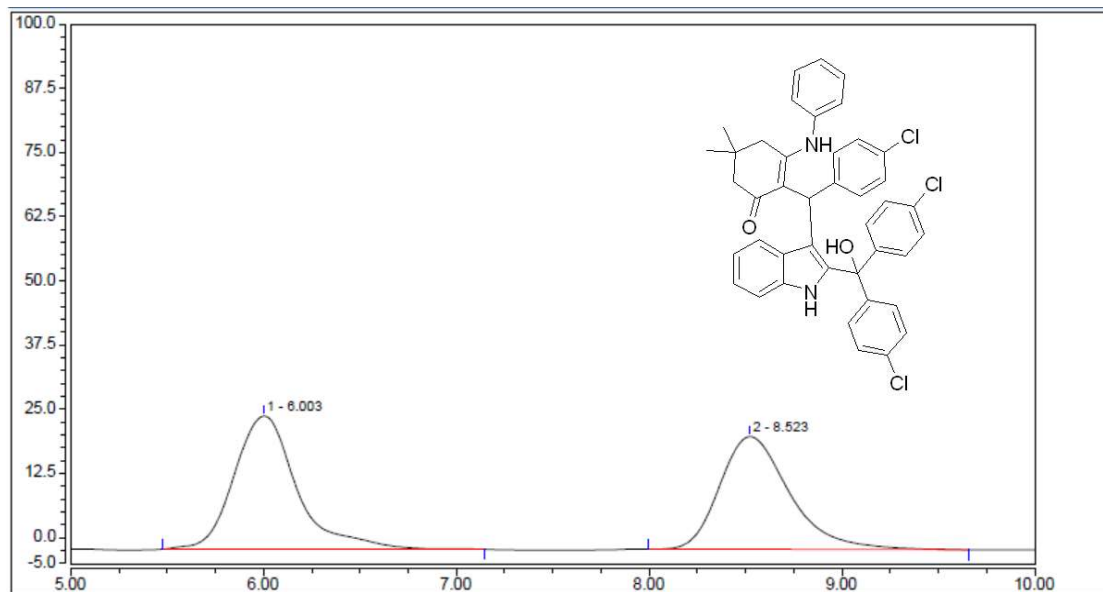

| Integration Results |           |                       |                 |               |                    |                      |                |
|---------------------|-----------|-----------------------|-----------------|---------------|--------------------|----------------------|----------------|
| No.                 | Peak Name | Retention Time<br>min | Area<br>mAU*min | Height<br>mAU | Relative Area<br>% | Relative Height<br>% | Amount<br>n.a. |
| 1                   |           | 6.003                 | 9.816           | 25.916        | 51.63              | 54.18                | n.a.           |
| 2                   |           | 8.523                 | 9.196           | 21.919        | 48.37              | 45.82                | n.a.           |
| Total:              |           |                       | 19.012          | 47.834        | 100.00             | 100.00               |                |

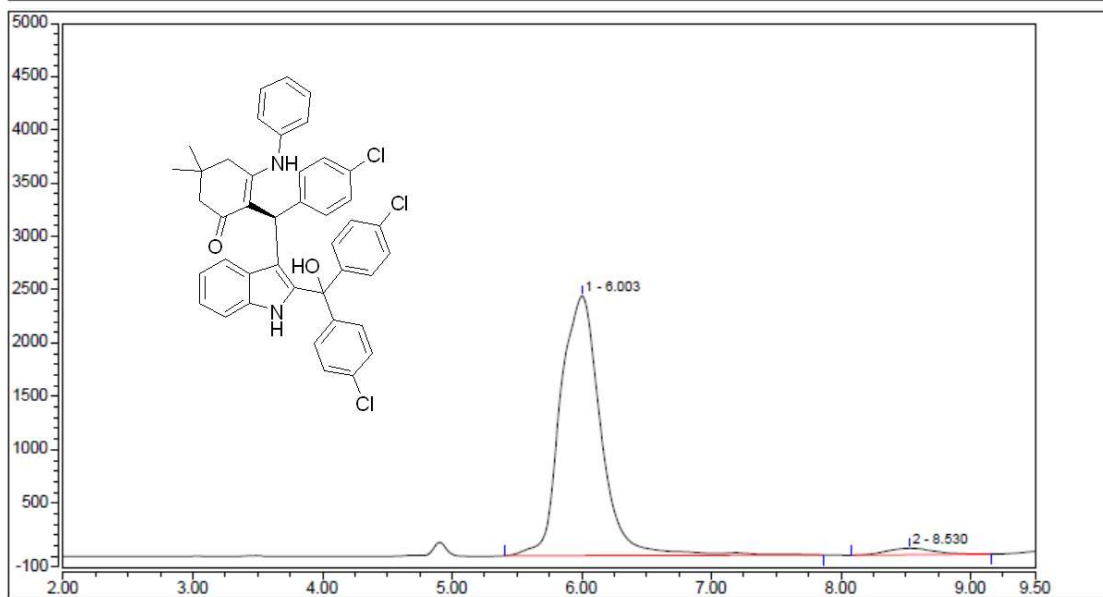

| Integration Results |           |                       |                 |               |                    |                      |                |
|---------------------|-----------|-----------------------|-----------------|---------------|--------------------|----------------------|----------------|
| No.                 | Peak Name | Retention Time<br>min | Area<br>mAU*min | Height<br>mAU | Relative Area<br>% | Relative Height<br>% | Amount<br>n.a. |
| 1                   |           | 6.003                 | 881.262         | 2437.382      | 97.19              | 97.57                | n.a.           |
| 2                   |           | 8.530                 | 25.484          | 60.820        | 2.81               | 2.43                 | n.a.           |
| Total:              |           |                       | 906.746         | 2498.202      | 100.00             | 100.00               |                |

3df

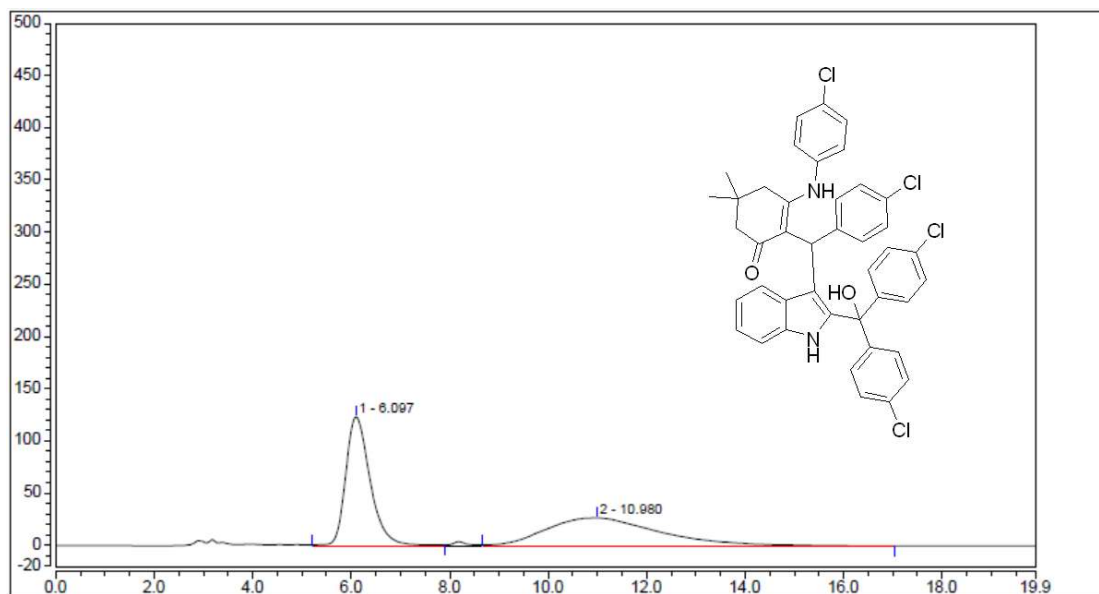

| Integration Results |           |                    |              |            |                 |                   |             |
|---------------------|-----------|--------------------|--------------|------------|-----------------|-------------------|-------------|
| No.                 | Peak Name | Retention Time min | Area mAU*min | Height mAU | Relative Area % | Relative Height % | Amount n.a. |
| 1                   |           | 6.097              | 71.151       | 123.644    | 50.14           | 82.23             | n.a.        |
| 2                   |           | 10.980             | 70.755       | 26.717     | 49.86           | 17.77             | n.a.        |
| Total:              |           |                    | 141.906      | 150.361    | 100.00          | 100.00            |             |

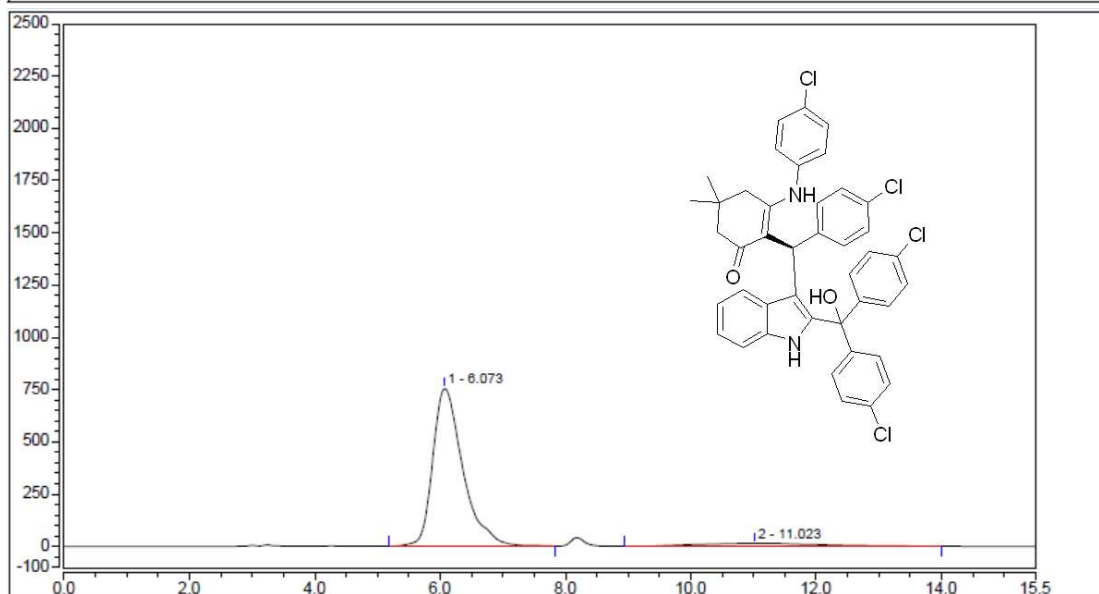

| Integration Results |           |                    |              |            |                 |                   |             |
|---------------------|-----------|--------------------|--------------|------------|-----------------|-------------------|-------------|
| No.                 | Peak Name | Retention Time min | Area mAU*min | Height mAU | Relative Area % | Relative Height % | Amount n.a. |
| 1                   |           | 6.073              | 419.503      | 753.694    | 92.81           | 98.23             | n.a.        |
| 2                   |           | 11.023             | 32.495       | 13.560     | 7.19            | 1.77              | n.a.        |
| Total:              |           |                    | 451.997      | 767.254    | 100.00          | 100.00            |             |

3dg

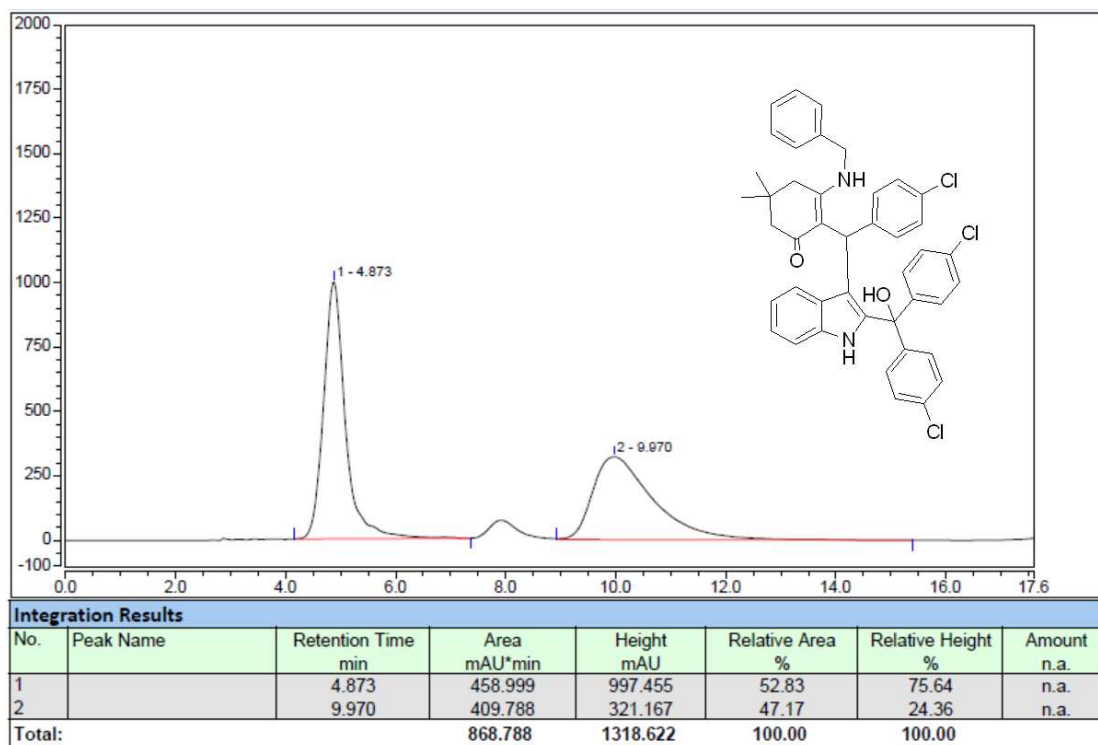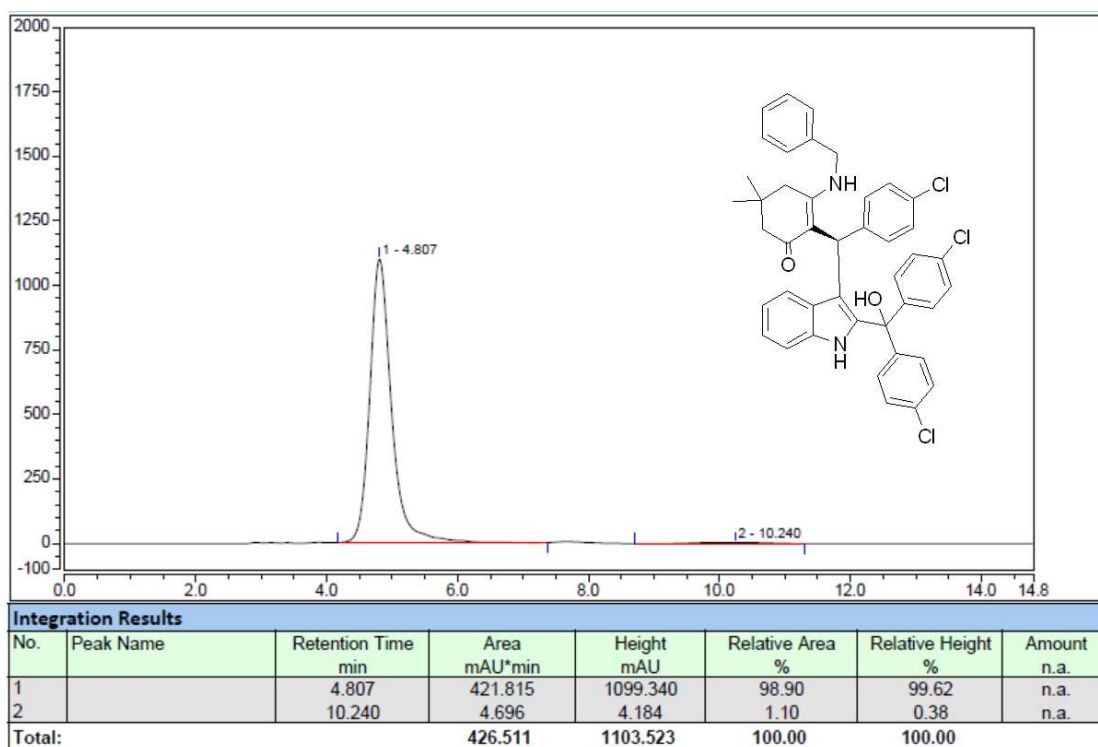

### 3ea

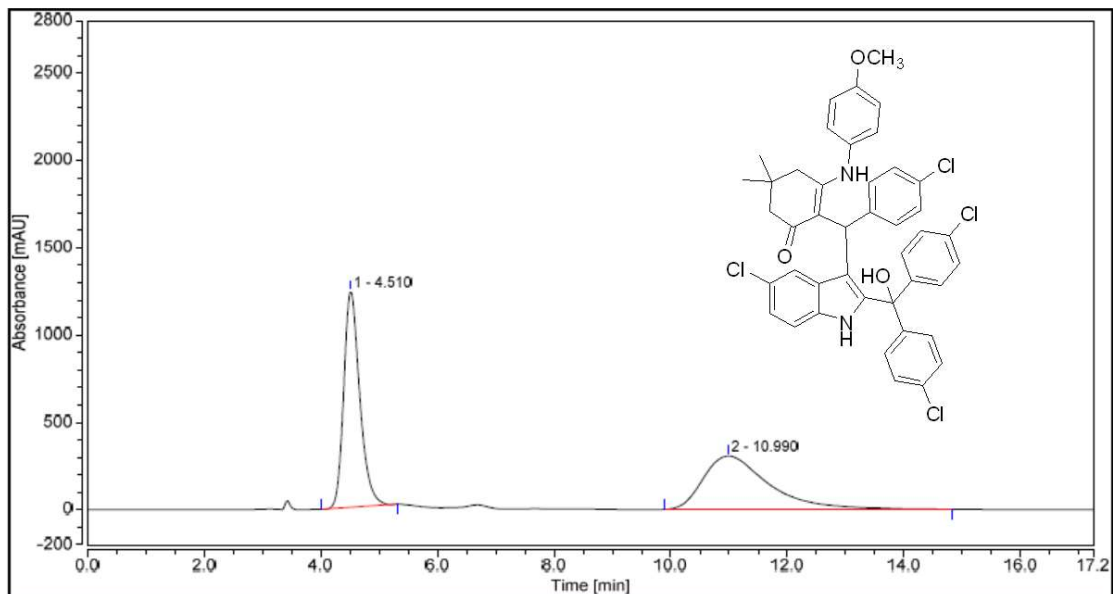

| Integration Results |           |                    |              |            |                 |                   |             |
|---------------------|-----------|--------------------|--------------|------------|-----------------|-------------------|-------------|
| No.                 | Peak Name | Retention Time min | Area mAU*min | Height mAU | Relative Area % | Relative Height % | Amount n.a. |
| 1                   |           | 4.510              | 392.159      | 1235.496   | 49.67           | 80.20             | n.a.        |
| 2                   |           | 10.990             | 397.445      | 305.033    | 50.33           | 19.80             | n.a.        |
| Total:              |           |                    | 789.604      | 1540.529   | 100.00          | 100.00            |             |

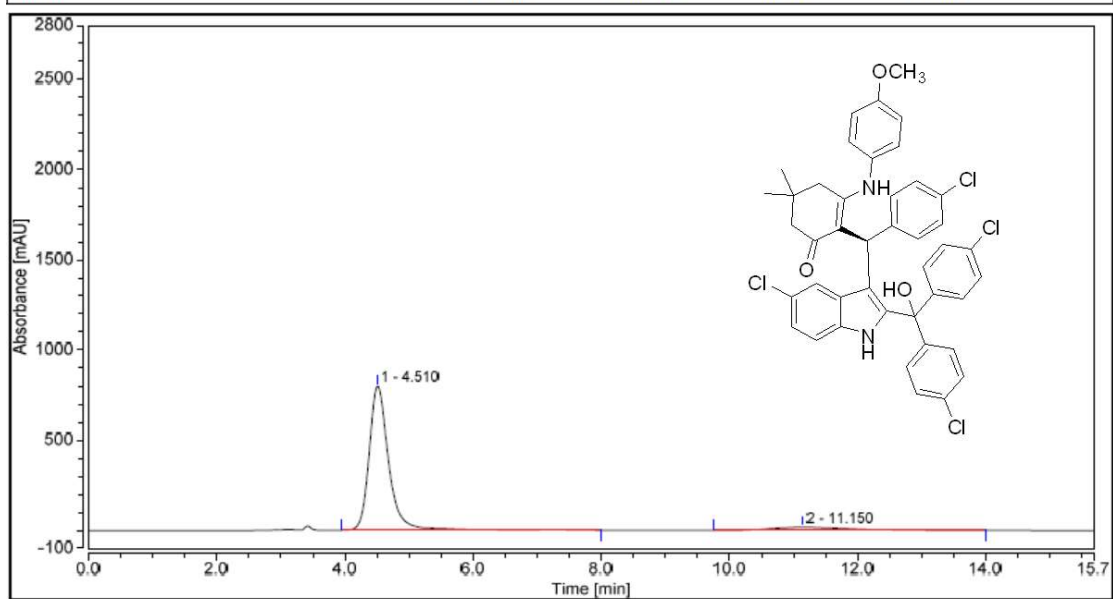

| Integration Results |           |                    |              |            |                 |                   |             |
|---------------------|-----------|--------------------|--------------|------------|-----------------|-------------------|-------------|
| No.                 | Peak Name | Retention Time min | Area mAU*min | Height mAU | Relative Area % | Relative Height % | Amount n.a. |
| 1                   |           | 4.510              | 283.527      | 798.981    | 92.30           | 97.87             | n.a.        |
| 2                   |           | 11.150             | 23.655       | 17.353     | 7.70            | 2.13              | n.a.        |
| Total:              |           |                    | 307.182      | 816.334    | 100.00          | 100.00            |             |

### 3fa

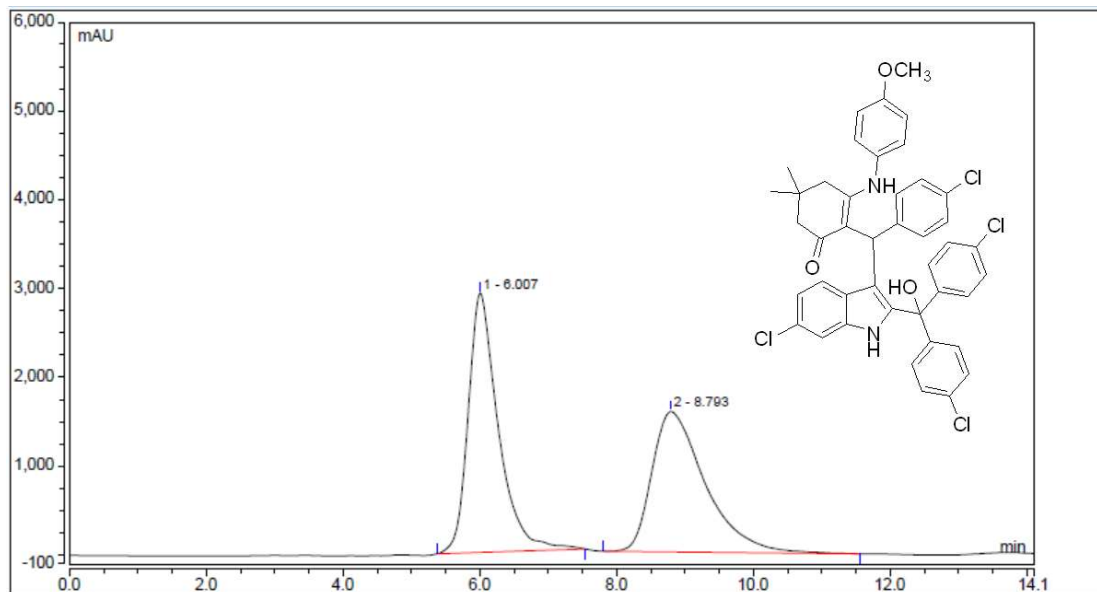

| Integration Results |           |                    |              |            |                 |                   |             |
|---------------------|-----------|--------------------|--------------|------------|-----------------|-------------------|-------------|
| No.                 | Peak Name | Retention Time min | Area mAU*min | Height mAU | Relative Area % | Relative Height % | Amount n.a. |
| 1                   |           | 6.007              | 1488.233     | 2922.759   | 51.06           | 64.90             | n.a.        |
| 2                   |           | 8.793              | 1426.479     | 1580.963   | 48.94           | 35.10             | n.a.        |
| Total:              |           |                    | 2914.712     | 4503.722   | 100.00          | 100.00            |             |

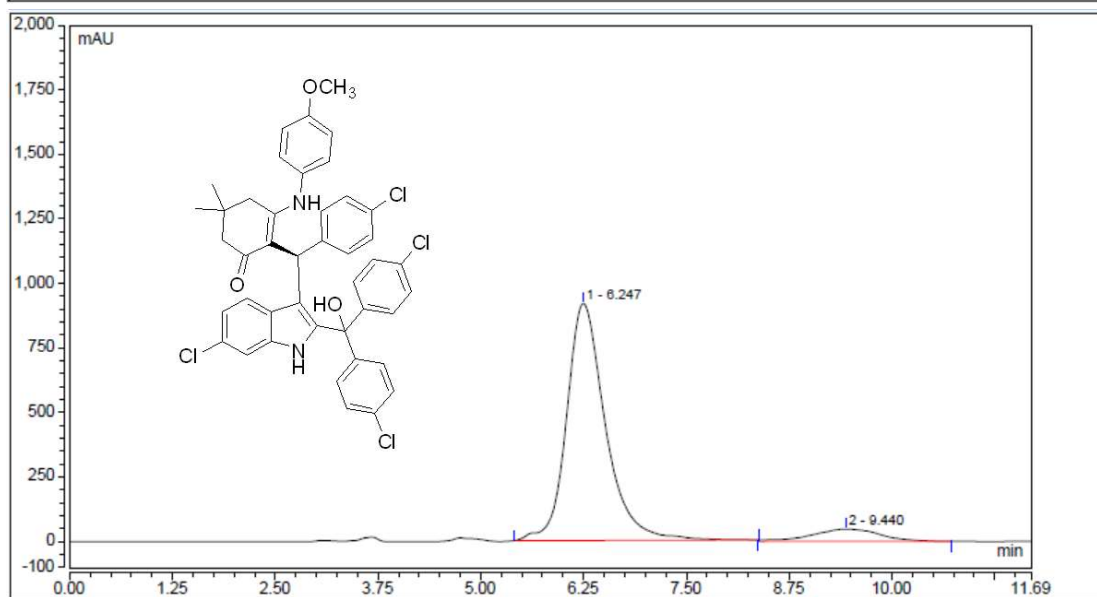

| Integration Results |           |                    |              |            |                 |                   |             |
|---------------------|-----------|--------------------|--------------|------------|-----------------|-------------------|-------------|
| No.                 | Peak Name | Retention Time min | Area mAU*min | Height mAU | Relative Area % | Relative Height % | Amount n.a. |
| 1                   |           | 6.247              | 503.422      | 918.202    | 91.69           | 95.05             | n.a.        |
| 2                   |           | 9.440              | 45.654       | 47.859     | 8.31            | 4.95              | n.a.        |
| Total:              |           |                    | 549.077      | 966.061    | 100.00          | 100.00            |             |

3di

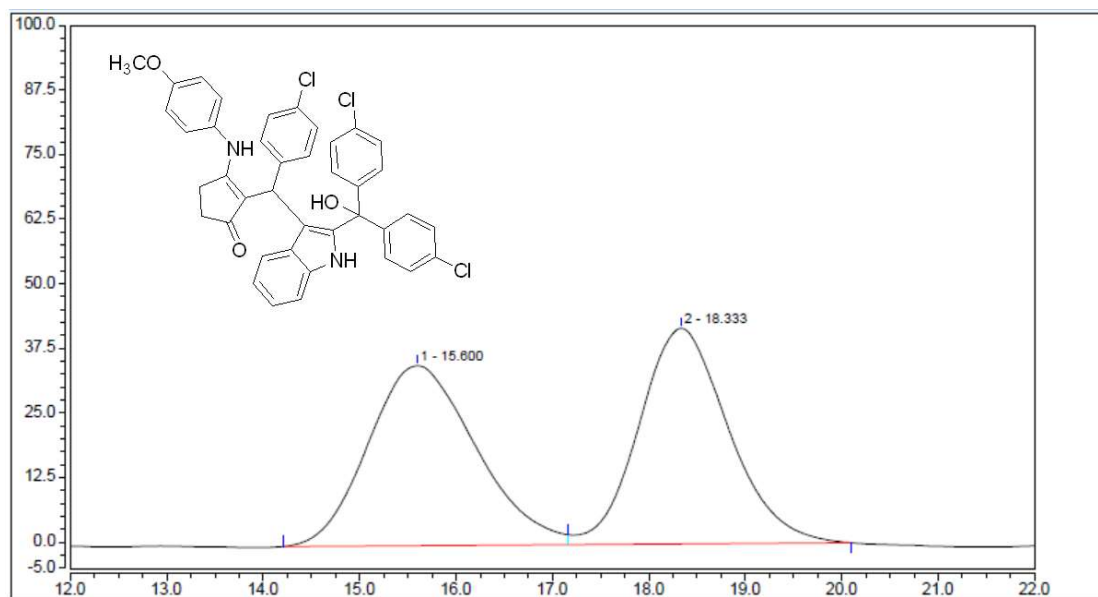

| Integration Results |           |                    |              |            |                 |                   |        |
|---------------------|-----------|--------------------|--------------|------------|-----------------|-------------------|--------|
| No.                 | Peak Name | Retention Time min | Area mAU*min | Height mAU | Relative Area % | Relative Height % | Amount |
| 1                   |           | 15.600             | 45.064       | 34.795     | 50.08           | 45.49             | n.a.   |
| 2                   |           | 18.333             | 44.913       | 41.693     | 49.92           | 54.51             | n.a.   |
| Total:              |           |                    | 89.977       | 76.488     | 100.00          | 100.00            |        |

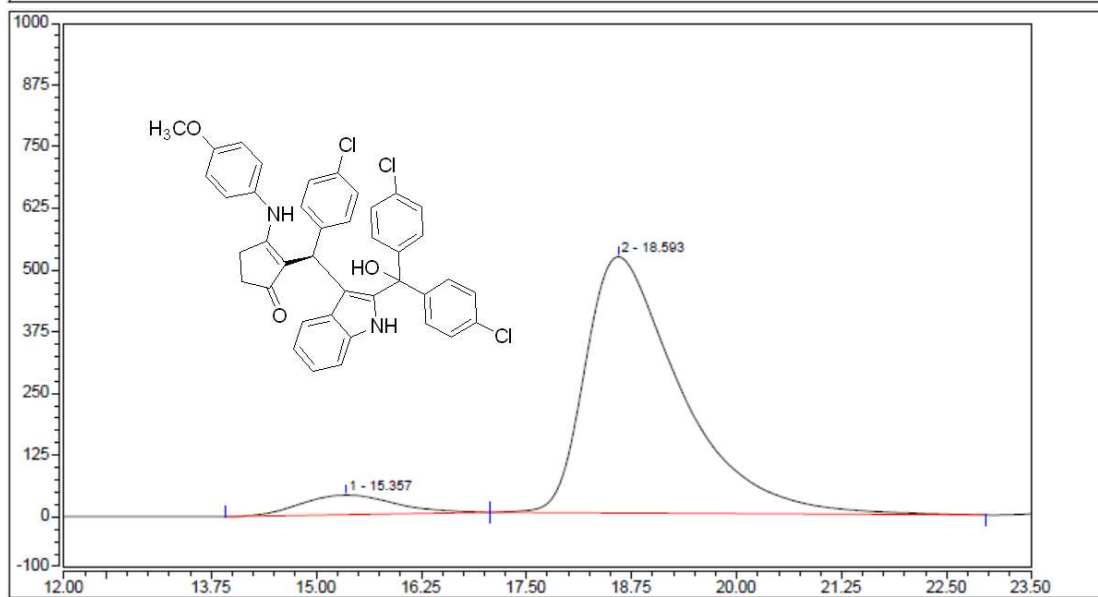

| Integration Results |           |                    |              |            |                 |                   |        |
|---------------------|-----------|--------------------|--------------|------------|-----------------|-------------------|--------|
| No.                 | Peak Name | Retention Time min | Area mAU*min | Height mAU | Relative Area % | Relative Height % | Amount |
| 1                   |           | 15.357             | 51.216       | 39.380     | 6.96            | 7.05              | n.a.   |
| 2                   |           | 18.593             | 684.561      | 518.928    | 93.04           | 92.95             | n.a.   |
| Total:              |           |                    | 735.777      | 558.307    | 100.00          | 100.00            |        |



3aj

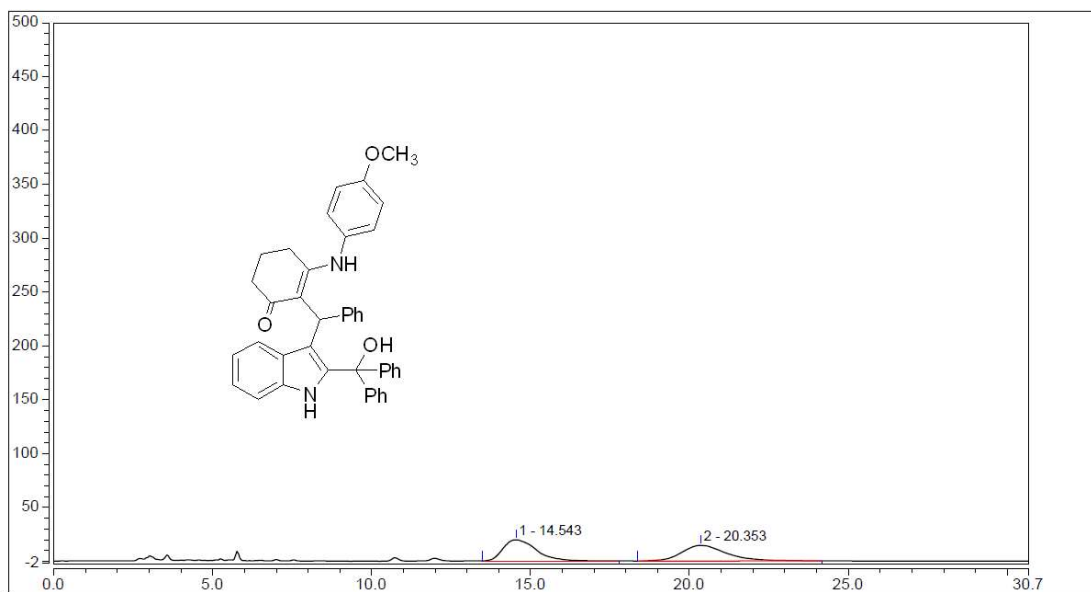

| Integration Results |           |                    |               |               |                 |                   |        |
|---------------------|-----------|--------------------|---------------|---------------|-----------------|-------------------|--------|
| No.                 | Peak Name | Retention Time min | Area mAU*min  | Height mAU    | Relative Area % | Relative Height % | Amount |
| 1                   |           | 14.543             | 23.443        | 19.645        | 49.71           | 57.56             | n.a.   |
| 2                   |           | 20.353             | 23.712        | 14.484        | 50.29           | 42.44             | n.a.   |
| <b>Total:</b>       |           |                    | <b>47.154</b> | <b>34.129</b> | <b>100.00</b>   | <b>100.00</b>     |        |

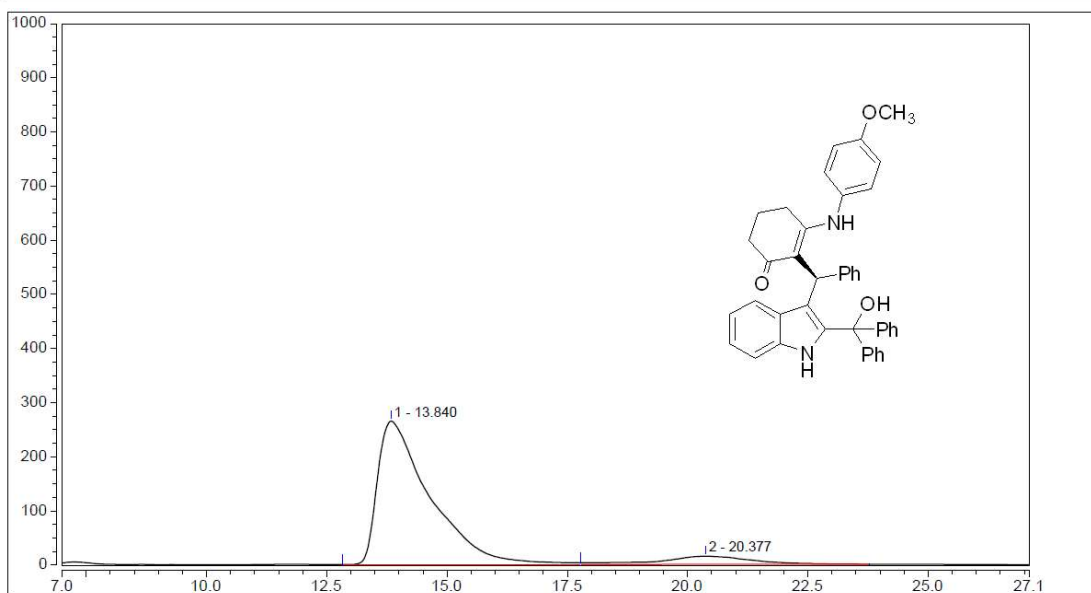

| Integration Results |           |                    |                |                |                 |                   |        |
|---------------------|-----------|--------------------|----------------|----------------|-----------------|-------------------|--------|
| No.                 | Peak Name | Retention Time min | Area mAU*min   | Height mAU     | Relative Area % | Relative Height % | Amount |
| 1                   |           | 13.840             | 334.593        | 264.698        | 91.02           | 94.59             | n.a.   |
| 2                   |           | 20.377             | 33.026         | 15.128         | 8.98            | 5.41              | n.a.   |
| <b>Total:</b>       |           |                    | <b>367.619</b> | <b>279.825</b> | <b>100.00</b>   | <b>100.00</b>     |        |



### 3ak

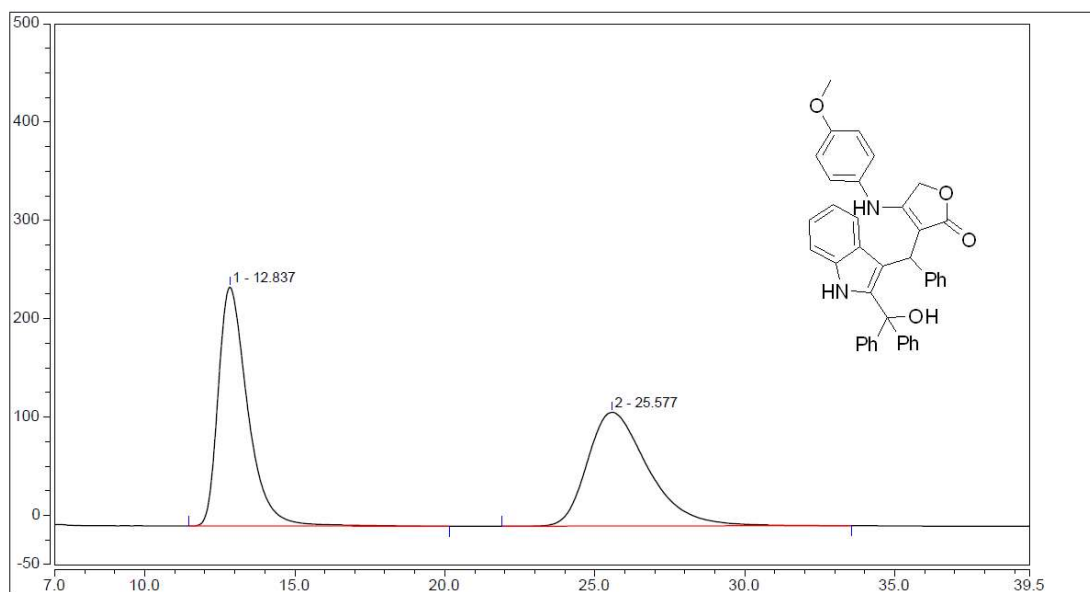

| Integration Results |           |                    |                |                |                 |                   |        |
|---------------------|-----------|--------------------|----------------|----------------|-----------------|-------------------|--------|
| No.                 | Peak Name | Retention Time min | Area mAU*min   | Height mAU     | Relative Area % | Relative Height % | Amount |
| 1                   |           | 12.837             | 276.938        | 242.929        | 50.46           | 67.73             | n.a.   |
| 2                   |           | 25.577             | 271.871        | 115.726        | 49.54           | 32.27             | n.a.   |
| <b>Total:</b>       |           |                    | <b>548.809</b> | <b>358.655</b> | <b>100.00</b>   | <b>100.00</b>     |        |

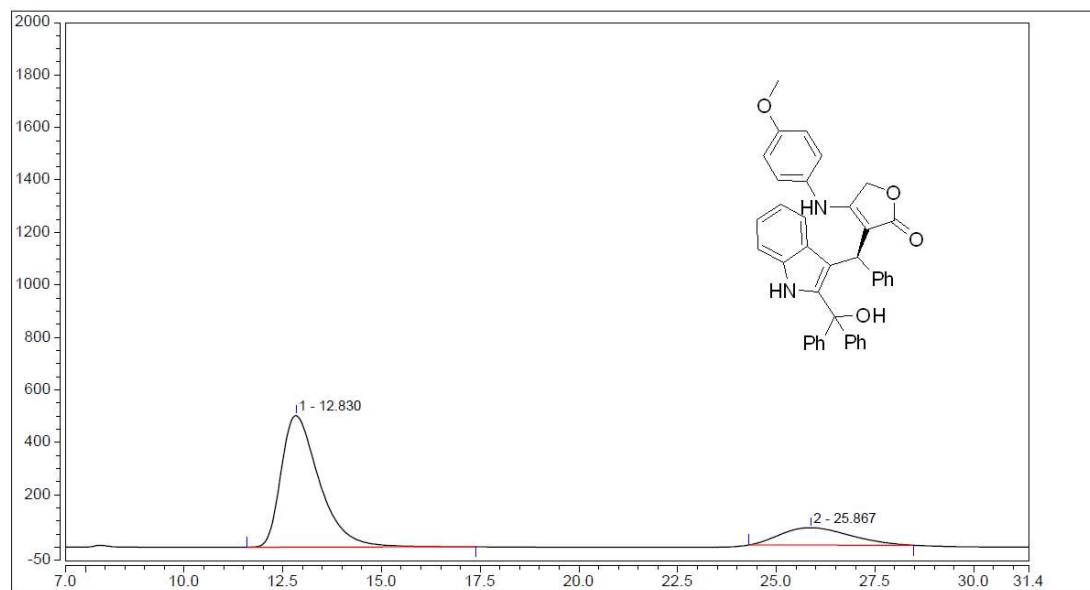

| Integration Results |           |                    |                |                |                 |                   |        |
|---------------------|-----------|--------------------|----------------|----------------|-----------------|-------------------|--------|
| No.                 | Peak Name | Retention Time min | Area mAU*min   | Height mAU     | Relative Area % | Relative Height % | Amount |
| 1                   |           | 12.830             | 562.644        | 501.332        | 80.55           | 88.34             | n.a.   |
| 2                   |           | 25.867             | 135.878        | 66.172         | 19.45           | 11.66             | n.a.   |
| <b>Total:</b>       |           |                    | <b>698.522</b> | <b>567.504</b> | <b>100.00</b>   | <b>100.00</b>     |        |

### 3ha

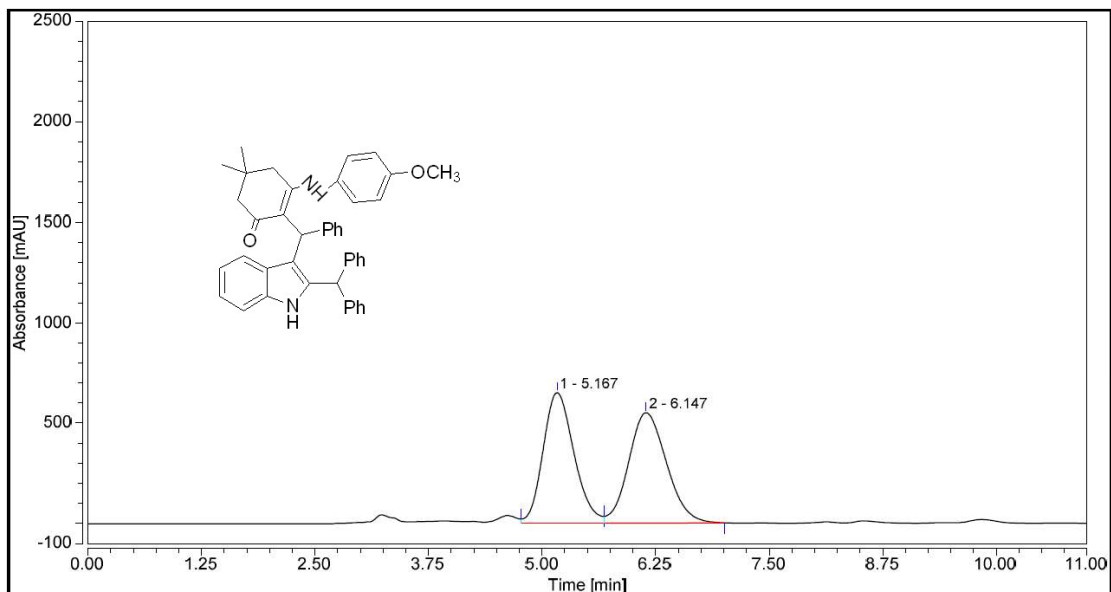

| Integration Results |           |                       |                 |                 |                    |                      |                |
|---------------------|-----------|-----------------------|-----------------|-----------------|--------------------|----------------------|----------------|
| No.                 | Peak Name | Retention Time<br>min | Area<br>mAU*min | Height<br>mAU   | Relative Area<br>% | Relative Height<br>% | Amount<br>n.a. |
| 1                   |           | 5.167                 | 256.003         | 648.579         | 49.15              | 54.19                | n.a.           |
| 2                   |           | 6.147                 | 264.898         | 548.371         | 50.85              | 45.81                | n.a.           |
| <b>Total:</b>       |           |                       | <b>520.901</b>  | <b>1196.950</b> | <b>100.00</b>      | <b>100.00</b>        |                |

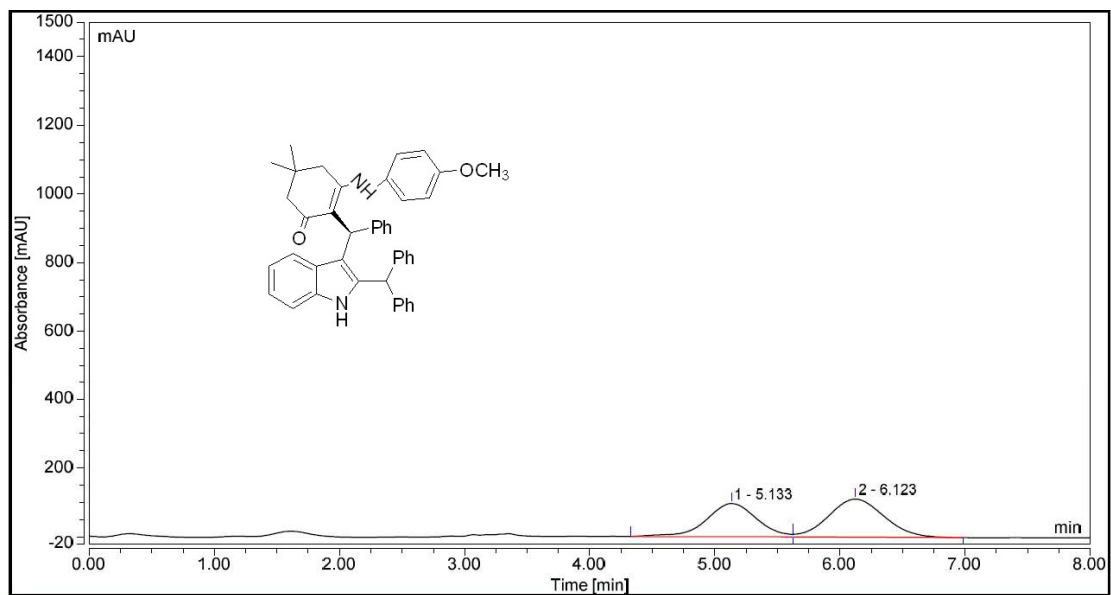

| Integration Results |           |                       |                 |                |                    |                      |                |
|---------------------|-----------|-----------------------|-----------------|----------------|--------------------|----------------------|----------------|
| No.                 | Peak Name | Retention Time<br>min | Area<br>mAU*min | Height<br>mAU  | Relative Area<br>% | Relative Height<br>% | Amount<br>n.a. |
| 1                   |           | 5.133                 | 44.958          | 96.304         | 44.26              | 46.60                | n.a.           |
| 2                   |           | 6.123                 | 56.625          | 110.342        | 55.74              | 53.40                | n.a.           |
| <b>Total:</b>       |           |                       | <b>101.583</b>  | <b>206.646</b> | <b>100.00</b>      | <b>100.00</b>        |                |

### 3ga

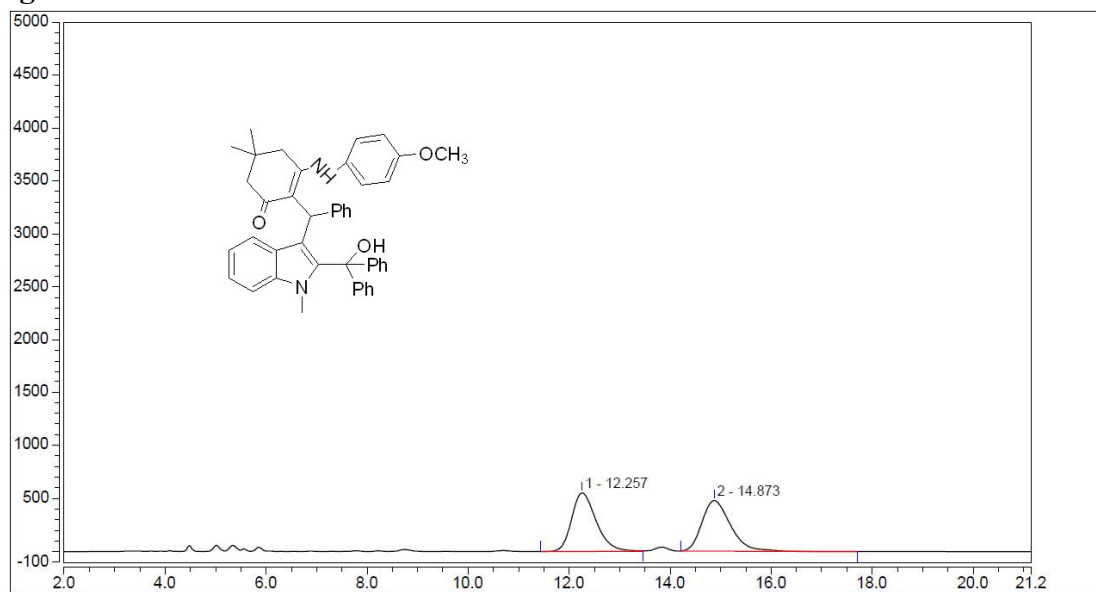

| Integration Results |           |                       |                 |                 |                    |                      |                |
|---------------------|-----------|-----------------------|-----------------|-----------------|--------------------|----------------------|----------------|
| No.                 | Peak Name | Retention Time<br>min | Area<br>mAU*min | Height<br>mAU   | Relative Area<br>% | Relative Height<br>% | Amount<br>n.a. |
| 1                   |           | 12.257                | 309.768         | 549.474         | 50.02              | 53.65                | n.a.           |
| 2                   |           | 14.873                | 309.579         | 474.624         | 49.98              | 46.35                | n.a.           |
| <b>Total:</b>       |           |                       | <b>619.348</b>  | <b>1024.098</b> | <b>100.00</b>      | <b>100.00</b>        |                |

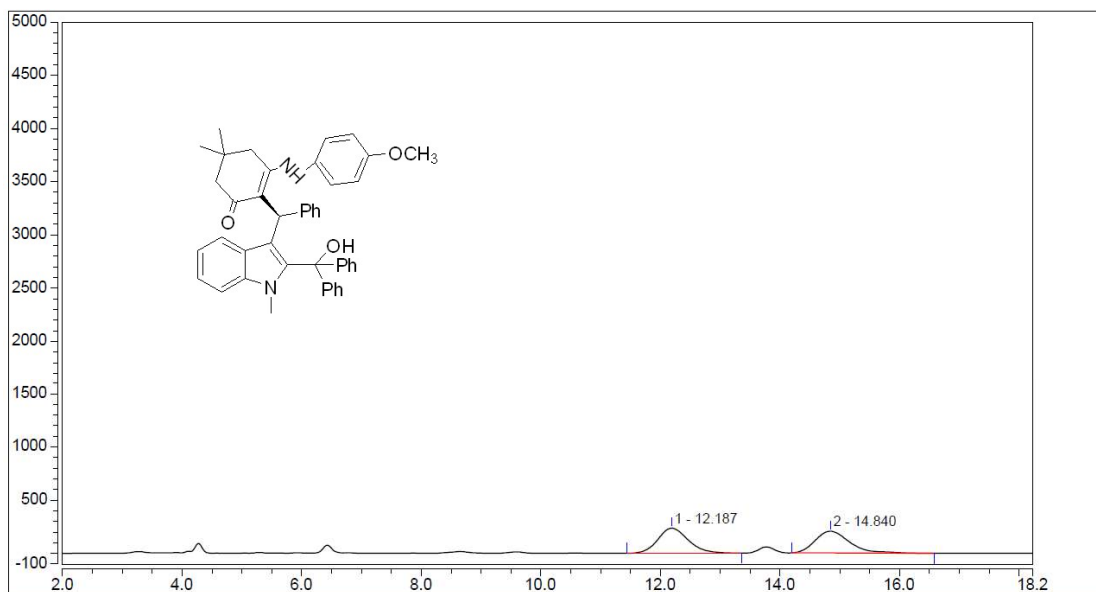

| Integration Results |           |                       |                 |                |                    |                      |                |
|---------------------|-----------|-----------------------|-----------------|----------------|--------------------|----------------------|----------------|
| No.                 | Peak Name | Retention Time<br>min | Area<br>mAU*min | Height<br>mAU  | Relative Area<br>% | Relative Height<br>% | Amount<br>n.a. |
| 1                   |           | 12.187                | 141.560         | 236.584        | 50.80              | 53.65                | n.a.           |
| 2                   |           | 14.840                | 137.101         | 204.415        | 49.20              | 46.35                | n.a.           |
| <b>Total:</b>       |           |                       | <b>278.661</b>  | <b>440.998</b> | <b>100.00</b>      | <b>100.00</b>        |                |

#### 4. X-ray single-crystal data of product 3dg

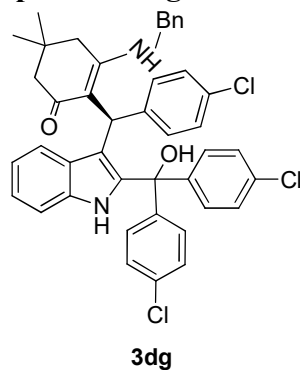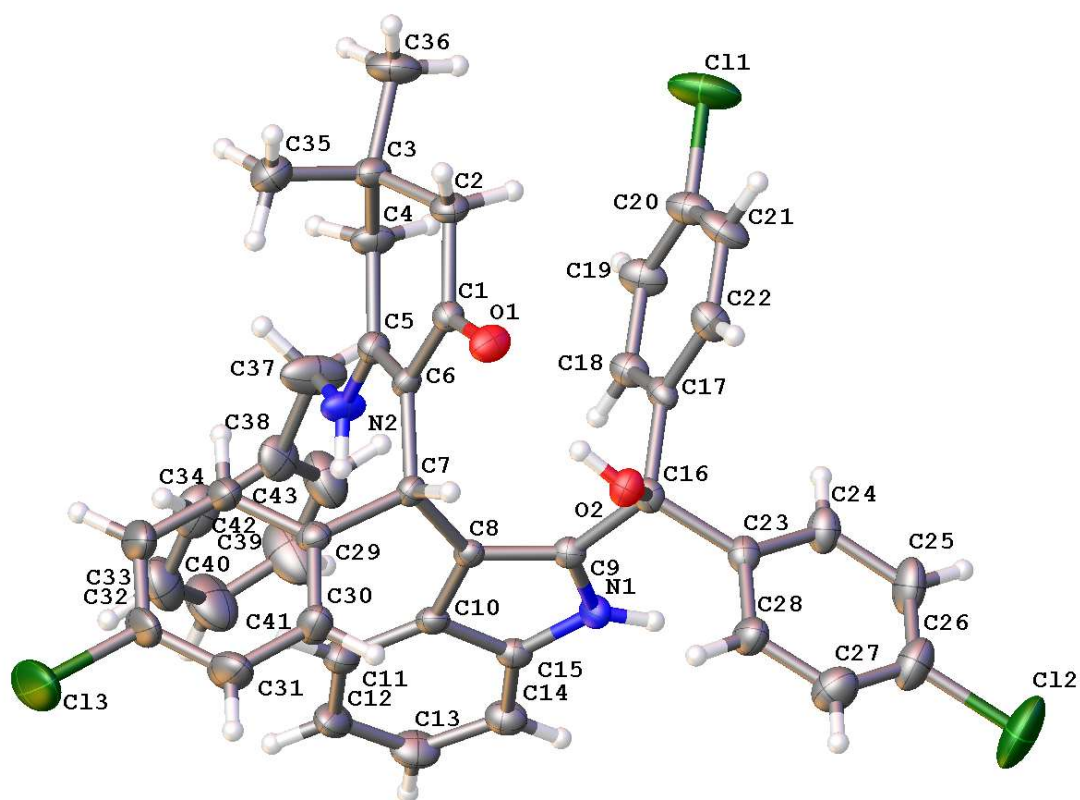

The thermal ellipsoid was drawn at the 30% probability level.

|                      |                                                                               |                  |
|----------------------|-------------------------------------------------------------------------------|------------------|
| Empirical formula    | C <sub>43</sub> H <sub>37</sub> Cl <sub>3</sub> N <sub>2</sub> O <sub>2</sub> |                  |
| Formula weight       | 720.09                                                                        |                  |
| Temperature          | 296.15 K                                                                      |                  |
| Wavelength           | 0.71073 Å                                                                     |                  |
| Crystal system       | Monoclinic                                                                    |                  |
| Space group          | P 1 2 <sub>1</sub> 1                                                          |                  |
| Unit cell dimensions | a = 10.757(9) Å                                                               | α = 90°.         |
|                      | b = 12.558(10) Å                                                              | β = 99.306(10)°. |
|                      | c = 14.389(12) Å                                                              | γ = 90°.         |
| Volume               | 1918(3) Å <sup>3</sup>                                                        |                  |

|                                   |                                             |
|-----------------------------------|---------------------------------------------|
| Z                                 | 2                                           |
| Density (calculated)              | 1.247 Mg/m <sup>3</sup>                     |
| Absorption coefficient            | 0.277 mm <sup>-1</sup>                      |
| F(000)                            | 752                                         |
| Crystal size                      | 0.4 x 0.25 x 0.2 mm <sup>3</sup>            |
| Theta range for data collection   | 2.165 to 28.097°.                           |
| Index ranges                      | -12<=h<=14, -14<=k<=16, -18<=l<=18          |
| Reflections collected             | 13691                                       |
| Independent reflections           | 7336 [R(int) = 0.0729]                      |
| Completeness to theta = 25.242°   | 99.1 %                                      |
| Absorption correction             | None                                        |
| Refinement method                 | Full-matrix least-squares on F <sup>2</sup> |
| Data / restraints / parameters    | 7336 / 1 / 454                              |
| Goodness-of-fit on F <sup>2</sup> | 0.988                                       |
| Final R indices [I>2sigma(I)]     | R1 = 0.0663, wR2 = 0.1372                   |
| R indices (all data)              | R1 = 0.1189, wR2 = 0.1587                   |
| Absolute structure parameter      | 0.00(10)                                    |
| Extinction coefficient            | n/a                                         |
| Largest diff. peak and hole       | 0.240 and -0.263 e.Å <sup>-3</sup>          |

## 5. Biological evaluation of compounds **3aa-3ae** and **3ag**

Table S1. Cell viability rate of compounds **3aa-3ae** and **3ag**

| Compound   | Survival rate on A549 cell line (%)   |              |              |              |
|------------|---------------------------------------|--------------|--------------|--------------|
|            | 0.01 ug/mL                            | 0.1 ug/mL    | 1 ug/mL      | 10 ug/mL     |
| <b>3aa</b> | 90.34± 4.72                           | 76.22± 2.59  | 64.11± 2.88  | 52.27± 1.20  |
| <b>3ab</b> | 91.21±3.53                            | 83.21± 1.87  | 74.43± 2.07  | 62.53± 1.38  |
| <b>3ac</b> | 99.96± 2.55                           | 89.39± 1.60  | 78.50± 2.66  | 72.27± 3.60  |
| <b>3ad</b> | 93.55± 1.35                           | 85.03± 1.27  | 76.58± 1.93  | 67.14± 1.23  |
| <b>3ae</b> | 99.30± 3.17                           | 94.07± 2.34  | 88.45± 1.87  | 81.40± 1.71  |
| <b>3ag</b> | 97.82± 3.59                           | 90.21± 2.32  | 80.58± 1.88  | 71.90± 1.37  |
| Compound   | Survival rate on ECA109 cell line (%) |              |              |              |
|            | 0.01 ug/mL                            | 0.1 ug/mL    | 1 ug/mL      | 10 ug/mL     |
| <b>3aa</b> | 101.49± 1.71                          | 94.44± 3.78  | 85.20± 1.46  | 74.49± 1.67  |
| <b>3ab</b> | 99.52±1.31                            | 92.41± 2.96  | 84.29± 1.75  | 74.38± 1.54  |
| <b>3ac</b> | 100.07± 3.00                          | 92.90± 2.14  | 87.83± 2.51  | 75.89± 2.69  |
| <b>3ad</b> | 101.15± 1.04                          | 96.84± 1.81  | 89.76± 1.46  | 82.52± 1.61  |
| <b>3ae</b> | 101.56± 3.69                          | 101.04± 2.08 | 101.22± 1.33 | 99.47± 0.87  |
| <b>3ag</b> | 104.38± 3.56                          | 102.52± 2.83 | 99.32± 1.57  | 100.71± 2.67 |
| Compound   | Survival rate on MCF-7 cell line (%)  |              |              |              |
|            | 0.01 ug/mL                            | 0.1 ug/mL    | 1 ug/mL      | 10 ug/mL     |
| <b>3aa</b> | 89.19±1.26                            | 71.90±2.03   | 58.96± 1.79  | 45.02± 2.07  |
| <b>3ab</b> | 90.59±3.08                            | 82.26± 1.95  | 70.93± 1.61  | 59.63± 2.10  |
| <b>3ac</b> | 98.29± 1.98                           | 85.18± 1.79  | 73.17± 1.98  | 65.94± 1.72  |
| <b>3ad</b> | 92.59± 1.82                           | 84.56± 1.72  | 73.91± 1.13  | 62.52± 1.61  |
| <b>3ae</b> | 99.84±1.82                            | 95.33± 1.34  | 90.19± 1.56  | 82.10± 1.00  |
| <b>3ag</b> | 95.44± 1.58                           | 85.21± 1.31  | 75.45± 2.75  | 68.55±1.50   |
